# Supplementary material for: Kinetochore-fiber lengths are maintained locally but coordinated globally by poles in the mammalian spindle
Source: eLife. 2023 Jul 3;12:e85208. doi: 10.7554/eLife.85208 (PMC10348741; doi:10.7554/eLife.85208)
Supplement: Figure 1—source data 1. [file elife-85208-fig1-data1.xlsx]

## Sheet: 1D
Condition	major_axis_length	minor_axis_length
PtK_GFP-tub	16.9668	7.62796
PtK_GFP-tub	20.294	7.77368
PtK_GFP-tub	22.1885	7.27915
PtK_GFP-tub	17.2522	7.99485
PtK_GFP-tub	18.0526	14.5007
PtK_GFP-tub	22.1767	9.14557
PtK_GFP-tub	24.0025	8.27201
PtK_GFP-tub	25.2136	10.2111
PtK_GFP-tub	23.4563	14.0345
PtK_GFP-tub	19.9475	7.50331
PtK_GFP-tub	22.4253	7.68464
PtK_GFP-tub	16.9952	7.93056
PtK_GFP-tub	20.7446	8.39845
PtK_GFP-tub	17.9061	8.28305
PtK_GFP-tub	17.4969	7.92948
PtK_GFP-tub	18.7214	8.75688
PtK_GFP-tub_mCh-p50	45.2826	34.9922
PtK_GFP-tub_mCh-p50	26.8838	10.6609
PtK_GFP-tub_mCh-p50	36.5242	25.4047
PtK_GFP-tub_mCh-p50	20.7618	15.8386
PtK_GFP-tub_mCh-p50	25.1122	17.0352
PtK_GFP-tub_mCh-p50	37.5233	19.6849
PtK_GFP-tub_mCh-p50	37.7697	30.1823
PtK_GFP-tub_mCh-p50	31.8959	23.9166
PtK_GFP-tub_mCh-p50	19.7979	14.4971
PtK_GFP-tub_mCh-p50	45.8664	34.9495
PtK_GFP-tub_mCh-p50	34.732	18.4705
PtK_GFP-tub_mCh-p50	35.8163	25.1482
PtK_GFP-tub_mCh-p50	25.1052	11.6802
PtK_GFP-tub_mCh-p50	30.1549	22.8402
PtK_GFP-tub_mCh-p50	24.8758	13.2688

## Sheet: 1E
Condition	kfiber_ID	raw_length	z_slice1	z_slice_2	z_length	hypot_len	centrosome-adjusted_hypot_length
PtK_GFP-tub	211216_007_01b_MAX15-22	9.87	15	22	2.1	10.0909	9.12093
PtK_GFP-tub	211223_003_04b_MAX4-20	7.455	4	20	4.8	8.86662	7.89662
PtK_GFP-tub	210812_003_06a_MAX23-30	8.505	23	30	2.1	8.76042	7.79042
PtK_GFP-tub	211223_003_05a_MAX11-18	8.4	11	18	2.1	8.65852	7.68852
PtK_GFP-tub	211223_007_05b_MAX14-19	10.5	14	19	1.5	10.6066	9.6366
PtK_GFP-tub	210812_001_01b_MAX25-34	9.975	25	34	2.7	10.334	9.36395
PtK_GFP-tub	211217_007_01b_MAX14-17	8.295	14	17	0.9	8.34368	7.37368
PtK_GFP-tub	210812_001_05b_MAX25-35	9.45	25	35	3	9.91476	8.94476
PtK_GFP-tub	210812_002_02b_MAX16-22	8.085	16	22	1.8	8.28295	7.31295
PtK_GFP-tub	210812_001_02a_MAX16-22	9.24	16	22	1.8	9.41369	8.44369
PtK_GFP-tub	211217_001_05a_MAX19-24	11.655	19	24	1.5	11.7511	10.7811
PtK_GFP-tub	211223_007_02b_MAX13-16	11.55	13	16	0.9	11.585	10.615
PtK_GFP-tub	211216_002_04b_MAX18-20	10.185	18	20	0.6	10.2027	9.23266
PtK_GFP-tub	211223_005_01a_MAX28-32	5.355	28	32	1.2	5.48781	4.51781
PtK_GFP-tub	210812_000_01b_MAX21-24	8.715	21	24	0.9	8.76135	7.79135
PtK_GFP-tub	211216_002_02a_MAX18-23	9.765	18	23	1.5	9.87954	8.90954
PtK_GFP-tub	210812_002_04b_MAX29-32	8.19	29	32	0.9	8.2393	7.2693
PtK_GFP-tub	210812_003_03b_MAX34-39	8.19	34	39	1.5	8.32623	7.35623
PtK_GFP-tub	211216_008_03b_MAX24-30	7.035	24	30	1.8	7.26163	6.29163
PtK_GFP-tub	211223_003_04a_MAX1-6	7.14	1	6	1.5	7.29586	6.32586
PtK_GFP-tub	211217_001_03a_MAX12-22	9.345	12	22	3	9.81474	8.84474
PtK_GFP-tub	210805_005_04b_MAX30-34	10.185	30	34	1.2	10.2554	9.28545
PtK_GFP-tub	210812_003_04b_MAX34-39	8.19	34	39	1.5	8.32623	7.35623
PtK_GFP-tub	210812_003_04a_MAX23-29	7.77	23	29	1.8	7.97577	7.00577
PtK_GFP-tub	210805_005_04a_MAX14-29	12.18	14	29	4.5	12.9847	12.0147
PtK_GFP-tub	211216_001_01b_MAX20-25	10.5	20	25	1.5	10.6066	9.6366
PtK_GFP-tub	211223_001_03a_MAX10-15	9.03	10	15	1.5	9.15374	8.18374
PtK_GFP-tub	211223_001_04a_MAX15-21	7.245	15	21	1.8	7.46525	6.49525
PtK_GFP-tub	210812_000_02b_MAX21-25	6.3	21	25	1.2	6.41327	5.44327
PtK_GFP-tub	211216_002_01a_MAX18-23	12.495	18	23	1.5	12.5847	11.6147
PtK_GFP-tub	210812_003_01a_MAX15-26	8.4	15	26	3.3	9.02497	8.05497
PtK_GFP-tub	210812_000_05b_MAX26-28	7.56	26	28	0.6	7.58377	6.61377
PtK_GFP-tub	211223_009_04b_MAX15-20	8.505	15	20	1.5	8.63626	7.66626
PtK_GFP-tub	211223_009_02a_MAX19-22	8.715	19	22	0.9	8.76135	7.79135
PtK_GFP-tub	211216_002_03a_MAX13-21	11.55	13	21	2.4	11.7967	10.8267
PtK_GFP-tub	211223_009_01a_MAX17-20	9.45	17	20	0.9	9.49276	8.52276
PtK_GFP-tub	210812_000_04a_MAX24-29	8.505	24	29	1.5	8.63626	7.66626
PtK_GFP-tub	211216_002_03b_MAX18-23	7.035	18	23	1.5	7.19314	6.22314
PtK_GFP-tub	211223_009_03b_MAX17-22	8.085	17	22	1.5	8.22297	7.25297
PtK_GFP-tub	210812_001_05a_MAX22-25	8.61	22	25	0.9	8.65691	7.68691
PtK_GFP-tub	210812_001_06b_MAX25-35	10.08	25	35	3	10.517	9.54696
PtK_GFP-tub	211223_009_04a_MAX15-17	7.875	15	17	0.6	7.89782	6.92782
PtK_GFP-tub	211217_007_04b_MAX18-21	8.61	18	21	0.9	8.65691	7.68691
PtK_GFP-tub	210812_001_02b_MAX23-33	10.395	23	33	3	10.8192	9.84924
PtK_GFP-tub	210805_005_01a_MAX12-21	10.08	12	21	2.7	10.4353	9.46534
PtK_GFP-tub	210812_003_02b_MAX25-38	8.82	25	38	3.9	9.64378	8.67378
PtK_GFP-tub	211217_001_02a_MAX13-22	8.19	13	22	2.7	8.62358	7.65358
PtK_GFP-tub	211223_005_01b_MAX29-31	8.19	29	31	0.6	8.21195	7.24195
PtK_GFP-tub	211217_001_02b_MAX13-16	10.5	13	16	0.9	10.5385	9.5685
PtK_GFP-tub	211223_003_01a_MAX8-14	6.615	8	14	1.8	6.85553	5.88553
PtK_GFP-tub	210812_000_01a_MAX22-23	4.935	22	23	0.3	4.94411	3.97411
PtK_GFP-tub	211216_001_02a_MAX12-17	8.715	12	17	1.5	8.84315	7.87315
PtK_GFP-tub	211223_001_03b_MAX14-23	6.09	14	23	2.7	6.66169	5.69169
PtK_GFP-tub	211223_001_02a_MAX8-15	9.45	8	15	2.1	9.68052	8.71052
PtK_GFP-tub	210812_003_05a_MAX22-28	7.98	22	28	1.8	8.18049	7.21049
PtK_GFP-tub	211216_008_01a_MAX20-30	8.505	20	30	3	9.01859	8.04859
PtK_GFP-tub	210812_000_06b_MAX29-36	8.295	29	36	2.1	8.55669	7.58669
PtK_GFP-tub	211217_007_03a_MAX15-18	6.51	15	18	0.9	6.57192	5.60192
PtK_GFP-tub	211216_008_01b_MAX25-35	10.605	25	35	3	11.0212	10.0512
PtK_GFP-tub	211223_003_05b_MAX12-19	7.875	12	19	2.1	8.15019	7.18019
PtK_GFP-tub	211216_007_03a_MAX13-18	10.605	13	18	1.5	10.7106	9.74056
PtK_GFP-tub	211223_009_03a_MAX16-22	8.925	16	22	1.8	9.1047	8.1347
PtK_GFP-tub	210812_002_01a_MAX19-25	10.185	19	25	1.8	10.3428	9.37283
PtK_GFP-tub	210812_001_03a_MAX17-21	7.875	17	21	1.2	7.9659	6.9959
PtK_GFP-tub	211223_005_02a_MAX30-33	7.98	30	33	0.9	8.03059	7.06059
PtK_GFP-tub	211217_007_04a_MAX19-23	8.085	19	23	1.2	8.17357	7.20357
PtK_GFP-tub	210812_000_05a_MAX27-28	6.09	27	28	0.3	6.09738	5.12738
PtK_GFP-tub	211217_001_05b_MAX14-20	10.185	14	20	1.8	10.3428	9.37283
PtK_GFP-tub	211223_009_05b_MAX16-23	8.505	16	23	2.1	8.76042	7.79042
PtK_GFP-tub	211217_001_01b_MAX13-19	9.345	13	19	1.8	9.51678	8.54678
PtK_GFP-tub	211217_007_03b_MAX12-16	10.08	12	16	1.2	10.1512	9.18118
PtK_GFP-tub	210812_002_03a_MAX19-22	8.82	19	22	0.9	8.8658	7.8958
PtK_GFP-tub	211216_008_03a_MAX22-25	7.245	22	25	0.9	7.30069	6.33069
PtK_GFP-tub	211217_007_02a_MAX15-18	8.295	15	18	0.9	8.34368	7.37368
PtK_GFP-tub	210812_001_01a_MAX19-22	9.03	19	22	0.9	9.07474	8.10474
PtK_GFP-tub	211216_001_02b_MAX17-25	10.29	17	25	2.4	10.5662	9.59618
PtK_GFP-tub	211223_007_03a_MAX17-20	11.025	17	20	0.9	11.0617	10.0917
PtK_GFP-tub	210812_002_03b_MAX23-28	5.67	23	28	1.5	5.86506	4.89506
PtK_GFP-tub	211223_003_01b_MAX15-20	9.135	15	20	1.5	9.25733	8.28733
PtK_GFP-tub	210812_000_03a_MAX20-25	6.93	20	25	1.5	7.09048	6.12048
PtK_GFP-tub	210812_002_01b_MAX21-26	7.98	21	26	1.5	8.11975	7.14975
PtK_GFP-tub	211223_003_02a_MAX8-15	5.67	8	15	2.1	6.0464	5.0764
PtK_GFP-tub	211223_003_03a_MAX19-23	4.935	19	23	1.2	5.0788	4.1088
PtK_GFP-tub	210812_003_02a_MAX25-38	7.14	25	38	3.9	8.1357	7.1657
PtK_GFP-tub	211217_001_04a_MAX11-19	11.55	11	19	2.4	11.7967	10.8267
PtK_GFP-tub	211216_008_02a_MAX18-28	7.455	18	28	3	8.03598	7.06598
PtK_GFP-tub	210805_005_03b_MAX21-27	11.13	21	27	1.8	11.2746	10.3046
PtK_GFP-tub	210812_001_06a_MAX17-24	8.085	17	24	2.1	8.35328	7.38328
PtK_GFP-tub	211217_001_01a_MAX14-22	8.82	14	22	2.4	9.1407	8.1707
PtK_GFP-tub	210812_000_06a_MAX29-36	7.56	29	36	2.1	7.84625	6.87625
PtK_GFP-tub	210805_005_02a_MAX24-28	9.24	24	28	1.2	9.3176	8.3476
PtK_GFP-tub	210812_002_05a_MAX28-33	7.665	28	33	1.5	7.81039	6.84039
PtK_GFP-tub	210812_003_06b_MAX32-38	8.19	32	38	1.8	8.38547	7.41547
PtK_GFP-tub	211216_002_05a_MAX15-20	9.45	15	20	1.5	9.56831	8.59831
PtK_GFP-tub	211223_003_02b_MAX15-21	8.715	15	21	1.8	8.89895	7.92895
PtK_GFP-tub	211223_001_01b_MAX20-22	9.24	20	22	0.6	9.25946	8.28946
PtK_GFP-tub	211216_007_01a_MAX13-19	9.45	13	19	1.8	9.6199	8.6499
PtK_GFP-tub	210812_002_05b_MAX19-24	8.4	19	24	1.5	8.53288	7.56288
PtK_GFP-tub	211223_009_05a_MAX16-22	9.45	16	22	1.8	9.6199	8.6499
PtK_GFP-tub	211223_007_01a_MAX14-18	11.025	14	18	1.2	11.0901	10.1201
PtK_GFP-tub	210812_002_06a_MAX22-27	5.88	22	27	1.5	6.06831	5.09831
PtK_GFP-tub	211223_003_03b_MAX18-23	8.715	18	23	1.5	8.84315	7.87315
PtK_GFP-tub	211217_001_04b_MAX10-18	9.765	10	18	2.4	10.0556	9.08561
PtK_GFP-tub	210812_002_02a_MAX16-22	8.925	16	22	1.8	9.1047	8.1347
PtK_GFP-tub	211216_007_03b_MAX17-25	7.875	17	25	2.4	8.2326	7.2626
PtK_GFP-tub	210812_000_02a_MAX21-23	8.505	21	23	0.6	8.52614	7.55614
PtK_GFP-tub	211216_008_02b_MAX26-30	6.825	26	30	1.2	6.92969	5.95969
PtK_GFP-tub	211216_001_03a_MAX20-28	9.135	20	28	2.4	9.44501	8.47501
PtK_GFP-tub	210812_001_04a_MAX16-22	9.45	16	22	1.8	9.6199	8.6499
PtK_GFP-tub	210805_005_03a_MAX20-26	11.13	20	26	1.8	11.2746	10.3046
PtK_GFP-tub	211223_007_05a_MAX14-18	11.97	14	18	1.2	12.03	11.06
PtK_GFP-tub	210812_000_07b_MAX34-38	7.245	34	38	1.2	7.34371	6.37371
PtK_GFP-tub	210812_000_03b_MAX21-24	5.67	21	24	0.9	5.74098	4.77098
PtK_GFP-tub	211223_007_04a_MAX14-16	10.605	14	16	0.6	10.622	9.65196
PtK_GFP-tub	211216_001_04b_MAX20-25	9.135	20	25	1.5	9.25733	8.28733
PtK_GFP-tub	210805_005_05b_MAX20-31	14.805	20	31	3.3	15.1683	14.1983
PtK_GFP-tub	211217_007_01a_MAX14-16	7.77	14	16	0.6	7.79313	6.82313
PtK_GFP-tub	211217_001_03b_MAX8-14	9.45	8	14	1.8	9.6199	8.6499
PtK_GFP-tub	211216_001_01a_MAX14-24	10.395	14	24	3	10.8192	9.84924
PtK_GFP-tub	210805_005_05a_MAX11-27	12.18	11	27	4.8	13.0917	12.1217
PtK_GFP-tub	211216_007_02b_MAX12-24	7.455	12	24	3.6	8.27871	7.30871
PtK_GFP-tub	211216_007_02a_MAX10-15	5.985	10	15	1.5	6.17011	5.20011
PtK_GFP-tub	211223_007_04b_MAX14-20	11.025	14	20	1.8	11.171	10.201
PtK_GFP-tub	211216_002_02b_MAX18-22	6.615	18	22	1.2	6.72296	5.75296
PtK_GFP-tub	211216_002_01b_MAX20-23	5.67	20	23	0.9	5.74098	4.77098
PtK_GFP-tub	211223_001_01a_MAX15-22	7.875	15	22	2.1	8.15019	7.18019
PtK_GFP-tub	211216_002_04a_MAX18-20	9.24	18	20	0.6	9.25946	8.28946
PtK_GFP-tub	211223_007_03b_MAX14-19	10.815	14	19	1.5	10.9185	9.94853
PtK_GFP-tub	211223_009_01b_MAX17-22	8.4	17	22	1.5	8.53288	7.56288
PtK_GFP-tub	211223_005_02b_MAX28-33	6.405	28	33	1.5	6.5783	5.6083
PtK_GFP-tub	211223_007_01b_MAX14-16	11.235	14	16	0.6	11.251	10.281
PtK_GFP-tub	210805_005_01b_MAX20-23	13.86	20	23	0.9	13.8892	12.9192
PtK_GFP-tub	210812_000_07a_MAX34-37	7.35	34	37	0.9	7.4049	6.4349
PtK_GFP-tub	211217_007_02b_MAX16-18	6.51	16	18	0.6	6.53759	5.56759
PtK_GFP-tub	211216_001_03b_MAX20-27	10.92	20	27	2.1	11.1201	10.1501
PtK_GFP-tub	211223_009_02b_MAX21-27	9.345	21	27	1.8	9.51678	8.54678
PtK_GFP-tub	210812_002_06b_MAX22-28	8.61	22	28	1.8	8.79614	7.82614
PtK_GFP-tub	210812_001_03b_MAX27-35	8.085	27	35	2.4	8.4337	7.4637
PtK_GFP-tub	211223_007_02a_MAX14-18	10.815	14	18	1.2	10.8814	9.91137
PtK_GFP-tub	210812_000_04b_MAX24-28	6.615	24	28	1.2	6.72296	5.75296
PtK_GFP-tub	211223_001_04b_MAX15-22	6.72	15	22	2.1	7.04048	6.07048
PtK_GFP-tub	211216_001_04a_MAX13-19	9.555	13	19	1.8	9.72307	8.75307
PtK_GFP-tub	211223_001_02b_MAX12-20	8.085	12	20	2.4	8.4337	7.4637
PtK_GFP-tub	211216_002_05b_MAX16-19	9.975	16	19	0.9	10.0155	9.04552
PtK_GFP-tub_mCh-p50	181001_002_01a_MAX3-10	9.3951	3	10	2.1	9.62694	9.62694
PtK_GFP-tub_mCh-p50	180817_019_05a_MAX16-22	11.3661	16	22	1.8	11.5077	11.5077
PtK_GFP-tub_mCh-p50	180903_018_04b_MAX16-29	9.2637	16	29	3.9	10.0512	10.0512
PtK_GFP-tub_mCh-p50	210519_002_04b_MAX10-14	9.66	10	14	1.2	9.73425	9.73425
PtK_GFP-tub_mCh-p50	190703_012_04a_MAX22-26	7.875	22	26	1.2	7.9659	7.9659
PtK_GFP-tub_mCh-p50	190625_006_05a_MAX28-33	3.36	28	33	1.5	3.67962	3.67962
PtK_GFP-tub_mCh-p50	180903_006_04b_MAX15-26	9.7236	15	26	3.3	10.2683	10.2683
PtK_GFP-tub_mCh-p50	190624_002_07b_MAX9-15	7.56	9	15	1.8	7.77133	7.77133
PtK_GFP-tub_mCh-p50	180903_007_03a_MAX35-39	7.7526	35	39	1.2	7.84492	7.84492
PtK_GFP-tub_mCh-p50	190703_012_05b_MAX4-11	3.465	4	11	2.1	4.05169	4.05169
PtK_GFP-tub_mCh-p50	181005_001_07b_MAX14-22	6.3729	14	22	2.4	6.80984	6.80984
PtK_GFP-tub_mCh-p50	180903_006_07b_MAX19-23	9.3951	19	23	1.2	9.47143	9.47143
PtK_GFP-tub_mCh-p50	181005_001_10a_MAX27-33	12.4173	27	33	1.8	12.5471	12.5471
PtK_GFP-tub_mCh-p50	180817_019_04a_MAX29-34	6.6357	29	34	1.5	6.80313	6.80313
PtK_GFP-tub_mCh-p50	181001_002_03a_MAX1-8	8.4753	1	8	2.1	8.73159	8.73159
PtK_GFP-tub_mCh-p50	210712_003_03b_MAX11-18	4.725	11	18	2.1	5.17065	5.17065
PtK_GFP-tub_mCh-p50	210712_003_02b_MAX7-17	8.4	7	17	3	8.91964	8.91964
PtK_GFP-tub_mCh-p50	180817_019_01a_MAX16-20	4.8618	16	20	1.2	5.0077	5.0077
PtK_GFP-tub_mCh-p50	180903_007_04a_MAX18-32	7.884	18	32	4.2	8.93294	8.93294
PtK_GFP-tub_mCh-p50	210519_010_01a_MAX7-13	6.615	7	13	1.8	6.85553	6.85553
PtK_GFP-tub_mCh-p50	190703_012_03a_MAX27-38	4.2	27	38	3.3	5.34135	5.34135
PtK_GFP-tub_mCh-p50	190624_001_08b_MAX19-28	4.305	19	28	2.7	5.08164	5.08164
PtK_GFP-tub_mCh-p50	180817_019_02a_MAX30-34	9.5265	30	34	1.2	9.60178	9.60178
PtK_GFP-tub_mCh-p50	180903_018_02b_MAX6-13	7.8183	6	13	2.1	8.09542	8.09542
PtK_GFP-tub_mCh-p50	210712_003_04b_MAX7-11	4.62	7	11	1.2	4.7733	4.7733
PtK_GFP-tub_mCh-p50	190703_012_01b_MAX14-22	9.45	14	22	2.4	9.75	9.75
PtK_GFP-tub_mCh-p50	210520_001_01b_MAX14-17	7.14	14	17	0.9	7.1965	7.1965
PtK_GFP-tub_mCh-p50	180903_018_03b_MAX11-26	9.7236	11	26	4.5	10.7144	10.7144
PtK_GFP-tub_mCh-p50	190703_012_06a_MAX27-37	8.4	27	37	3	8.91964	8.91964
PtK_GFP-tub_mCh-p50	190624_002_04a_MAX29-33	6.615	29	33	1.2	6.72296	6.72296
PtK_GFP-tub_mCh-p50	210712_003_03a_MAX18-21	4.2	18	21	0.9	4.29535	4.29535
PtK_GFP-tub_mCh-p50	180903_018_02a_MAX16-29	5.7159	16	29	3.9	6.91965	6.91965
PtK_GFP-tub_mCh-p50	190703_014_02b_MAX10-17	8.505	10	17	2.1	8.76042	8.76042
PtK_GFP-tub_mCh-p50	190703_012_03b_MAX27-34	7.665	27	34	2.1	7.94747	7.94747
PtK_GFP-tub_mCh-p50	190703_012_08a_MAX19-24	6.195	19	24	1.5	6.37401	6.37401
PtK_GFP-tub_mCh-p50	190703_012_02a_MAX29-37	10.5	29	37	2.4	10.7708	10.7708
PtK_GFP-tub_mCh-p50	181005_001_03b_MAX18-30	10.1178	18	30	3.6	10.7392	10.7392
PtK_GFP-tub_mCh-p50	180903_007_07b_MAX9-14	4.1391	9	14	1.5	4.40252	4.40252
PtK_GFP-tub_mCh-p50	190624_002_06b_MAX13-20	8.4	13	20	2.1	8.65852	8.65852
PtK_GFP-tub_mCh-p50	180817_019_06b_MAX13-18	11.7603	13	18	1.5	11.8556	11.8556
PtK_GFP-tub_mCh-p50	190625_006_02a_MAX10-20	9.555	10	20	3	10.0149	10.0149
PtK_GFP-tub_mCh-p50	180903_006_02b_MAX15-28	14.5197	15	28	3.9	15.0344	15.0344
PtK_GFP-tub_mCh-p50	190624_001_02b_MAX13-29	6.195	13	29	4.8	7.83697	7.83697
PtK_GFP-tub_mCh-p50	190625_006_07a_MAX37-41	8.61	37	41	1.2	8.69322	8.69322
PtK_GFP-tub_mCh-p50	180817_019_05b_MAX13-22	12.8772	13	22	2.7	13.1572	13.1572
PtK_GFP-tub_mCh-p50	190625_006_01a_MAX12-23	6.615	12	23	3.3	7.39244	7.39244
PtK_GFP-tub_mCh-p50	210520_001_01a_MAX11-15	4.62	11	15	1.2	4.7733	4.7733
PtK_GFP-tub_mCh-p50	210519_002_03b_MAX9-13	7.98	9	13	1.2	8.06972	8.06972
PtK_GFP-tub_mCh-p50	181001_002_06b_MAX26-33	4.2705	26	33	2.1	4.7589	4.7589
PtK_GFP-tub_mCh-p50	181001_002_02a_MAX4-15	8.4753	4	15	3.3	9.09509	9.09509
PtK_GFP-tub_mCh-p50	210520_001_06b_MAX11-19	5.46	11	19	2.4	5.96419	5.96419
PtK_GFP-tub_mCh-p50	190624_001_07b_MAX8-15	3.675	8	15	2.1	4.23269	4.23269
PtK_GFP-tub_mCh-p50	190624_001_04a_MAX16-26	5.145	16	26	3	5.95576	5.95576
PtK_GFP-tub_mCh-p50	190625_006_04a_MAX23-30	9.24	23	30	2.1	9.47563	9.47563
PtK_GFP-tub_mCh-p50	210519_005_01a_MAX30-33	5.565	30	33	0.9	5.63731	5.63731
PtK_GFP-tub_mCh-p50	190703_012_01a_MAX21-27	6.825	21	27	1.8	7.05837	7.05837
PtK_GFP-tub_mCh-p50	210519_002_02b_MAX8-9	3.36	8	9	0.3	3.37337	3.37337
PtK_GFP-tub_mCh-p50	190703_012_08b_MAX20-25	6.09	20	25	1.5	6.27201	6.27201
PtK_GFP-tub_mCh-p50	180903_018_06b_MAX10-20	7.7526	10	20	3	8.31281	8.31281
PtK_GFP-tub_mCh-p50	190624_001_01a_MAX4-12	5.145	4	12	2.4	5.67724	5.67724
PtK_GFP-tub_mCh-p50	180903_007_06b_MAX31-38	5.3874	31	38	2.1	5.78222	5.78222
PtK_GFP-tub_mCh-p50	190624_002_06a_MAX17-28	9.03	17	28	3.3	9.6141	9.6141
PtK_GFP-tub_mCh-p50	180903_007_02b_MAX21-28	11.169	21	28	2.1	11.3647	11.3647
PtK_GFP-tub_mCh-p50	210519_002_03a_MAX9-13	7.56	9	13	1.2	7.65465	7.65465
PtK_GFP-tub_mCh-p50	190624_001_06a_MAX19-33	3.885	19	33	4.2	5.7213	5.7213
PtK_GFP-tub_mCh-p50	181005_001_04a_MAX10-14	5.8473	10	14	1.2	5.96916	5.96916
PtK_GFP-tub_mCh-p50	190624_001_03b_MAX7-16	5.985	7	16	2.7	6.56584	6.56584
PtK_GFP-tub_mCh-p50	210519_002_02a_MAX7-10	7.35	7	10	0.9	7.4049	7.4049
PtK_GFP-tub_mCh-p50	210712_003_01b_MAX8-13	3.57	8	13	1.5	3.87232	3.87232
PtK_GFP-tub_mCh-p50	210520_001_08a_MAX20-25	3.57	20	25	1.5	3.87232	3.87232
PtK_GFP-tub_mCh-p50	210519_005_03b_MAX16-21	7.56	16	21	1.5	7.70737	7.70737
PtK_GFP-tub_mCh-p50	181005_001_03a_MAX31-37	4.9932	31	37	1.8	5.30773	5.30773
PtK_GFP-tub_mCh-p50	190624_002_03b_MAX10-25	14.385	10	25	4.5	15.0724	15.0724
PtK_GFP-tub_mCh-p50	210520_001_02b_MAX17-21	8.085	17	21	1.2	8.17357	8.17357
PtK_GFP-tub_mCh-p50	210520_001_03a_MAX7-15	6.72	7	15	2.4	7.13571	7.13571
PtK_GFP-tub_mCh-p50	210520_001_07a_MAX21-27	5.88	21	27	1.8	6.14934	6.14934
PtK_GFP-tub_mCh-p50	190703_014_01b_MAX13-18	11.55	13	18	1.5	11.647	11.647
PtK_GFP-tub_mCh-p50	181005_001_09b_MAX14-18	4.9932	14	18	1.2	5.13537	5.13537
PtK_GFP-tub_mCh-p50	181001_002_05a_MAX9-24	7.227	9	24	4.5	8.51349	8.51349
PtK_GFP-tub_mCh-p50	190624_002_01b_MAX21-27	5.46	21	27	1.8	5.74905	5.74905
PtK_GFP-tub_mCh-p50	190625_006_02b_MAX5-12	8.925	5	12	2.1	9.16873	9.16873
PtK_GFP-tub_mCh-p50	190703_014_04b_MAX13-17	9.345	13	17	1.2	9.42173	9.42173
PtK_GFP-tub_mCh-p50	181005_001_06a_MAX30-41	5.913	30	41	3.3	6.77153	6.77153
PtK_GFP-tub_mCh-p50	180903_018_11b_MAX26-33	4.0077	26	33	2.1	4.52456	4.52456
PtK_GFP-tub_mCh-p50	180903_006_02a_MAX29-34	8.6724	29	34	1.5	8.80117	8.80117
PtK_GFP-tub_mCh-p50	210519_002_06b_MAX13-17	6.72	13	17	1.2	6.8263	6.8263
PtK_GFP-tub_mCh-p50	180903_006_01b_MAX14-19	9.0666	14	19	1.5	9.18984	9.18984
PtK_GFP-tub_mCh-p50	190624_001_08a_MAX25-33	2.625	25	33	2.4	3.55677	3.55677
PtK_GFP-tub_mCh-p50	190624_002_01a_MAX24-32	11.13	24	32	2.4	11.3858	11.3858
PtK_GFP-tub_mCh-p50	190624_002_07a_MAX9-17	8.4	9	17	2.4	8.73613	8.73613
PtK_GFP-tub_mCh-p50	210519_010_04a_MAX10-16	8.4	10	16	1.8	8.59069	8.59069
PtK_GFP-tub_mCh-p50	180903_018_08b_MAX22-30	7.0299	22	30	2.4	7.42829	7.42829
PtK_GFP-tub_mCh-p50	180903_007_02a_MAX29-43	11.169	29	43	4.2	11.9326	11.9326
PtK_GFP-tub_mCh-p50	181001_002_04b_MAX20-39	13.6656	20	39	5.7	14.8067	14.8067
PtK_GFP-tub_mCh-p50	190624_001_07a_MAX12-19	5.46	12	19	2.1	5.84992	5.84992
PtK_GFP-tub_mCh-p50	180903_018_11a_MAX35-44	5.7159	35	44	2.7	6.32151	6.32151
PtK_GFP-tub_mCh-p50	181001_002_04a_MAX18-37	9.1323	18	37	5.7	10.7652	10.7652
PtK_GFP-tub_mCh-p50	180817_019_03a_MAX21-27	6.2415	21	27	1.8	6.49587	6.49587
PtK_GFP-tub_mCh-p50	181001_002_09a_MAX1-9	3.7449	1	9	2.4	4.44795	4.44795
PtK_GFP-tub_mCh-p50	190624_001_05a_MAX19-33	2.835	19	33	4.2	5.06727	5.06727
PtK_GFP-tub_mCh-p50	190624_002_05a_MAX17-28	11.235	17	28	3.3	11.7096	11.7096
PtK_GFP-tub_mCh-p50	190703_012_07b_MAX19-31	8.82	19	31	3.6	9.52641	9.52641
PtK_GFP-tub_mCh-p50	210519_002_01b_MAX5-7	6.195	5	7	0.6	6.22399	6.22399
PtK_GFP-tub_mCh-p50	190624_001_04b_MAX9-16	2.205	9	16	2.1	3.045	3.045
PtK_GFP-tub_mCh-p50	210519_002_01a_MAX5-9	9.345	5	9	1.2	9.42173	9.42173
PtK_GFP-tub_mCh-p50	210712_003_05a_MAX10-16	6.195	10	16	1.8	6.4512	6.4512
PtK_GFP-tub_mCh-p50	210519_005_02a_MAX11-17	5.88	11	17	1.8	6.14934	6.14934
PtK_GFP-tub_mCh-p50	181001_002_01b_MAX3-10	3.8106	3	10	2.1	4.35094	4.35094
PtK_GFP-tub_mCh-p50	210520_001_04b_MAX3-11	6.3	3	11	2.4	6.74166	6.74166
PtK_GFP-tub_mCh-p50	190625_006_08b_MAX37-43	5.67	37	43	1.8	5.94886	5.94886
PtK_GFP-tub_mCh-p50	181005_001_02b_MAX21-27	4.8618	21	27	1.8	5.18431	5.18431
PtK_GFP-tub_mCh-p50	181001_002_07b_MAX14-22	8.0811	14	22	2.4	8.42996	8.42996
PtK_GFP-tub_mCh-p50	181005_001_07a_MAX19-29	7.3584	19	29	3	7.94645	7.94645
PtK_GFP-tub_mCh-p50	180817_019_03b_MAX23-32	8.541	23	32	2.7	8.9576	8.9576
PtK_GFP-tub_mCh-p50	210519_010_03b_MAX15-18	6.93	15	18	0.9	6.9882	6.9882
PtK_GFP-tub_mCh-p50	210519_002_06a_MAX14-18	7.035	14	18	1.2	7.13661	7.13661
PtK_GFP-tub_mCh-p50	181001_002_02b_MAX1-11	4.2705	1	11	3	5.21892	5.21892
PtK_GFP-tub_mCh-p50	190703_014_04a_MAX16-25	8.82	16	25	2.7	9.22401	9.22401
PtK_GFP-tub_mCh-p50	210520_001_04a_MAX1-8	6.93	1	8	2.1	7.24119	7.24119
PtK_GFP-tub_mCh-p50	180903_018_07b_MAX9-18	7.0956	9	18	2.7	7.59194	7.59194
PtK_GFP-tub_mCh-p50	210519_010_04b_MAX12-16	7.14	12	16	1.2	7.24014	7.24014
PtK_GFP-tub_mCh-p50	180903_006_06a_MAX22-30	8.4753	22	30	2.4	8.80856	8.80856
PtK_GFP-tub_mCh-p50	190703_012_06b_MAX23-30	5.985	23	30	2.1	6.34273	6.34273
PtK_GFP-tub_mCh-p50	180903_006_03b_MAX14-22	9.2637	14	22	2.4	9.56954	9.56954
PtK_GFP-tub_mCh-p50	180903_018_03a_MAX17-24	3.7449	17	24	2.1	4.29352	4.29352
PtK_GFP-tub_mCh-p50	210519_005_04b_MAX27-32	6.615	27	32	1.5	6.78294	6.78294
PtK_GFP-tub_mCh-p50	180903_018_05b_MAX7-10	6.2415	7	10	0.9	6.30605	6.30605
PtK_GFP-tub_mCh-p50	190703_012_05a_MAX10-18	7.455	10	18	2.4	7.8318	7.8318
PtK_GFP-tub_mCh-p50	181005_001_09a_MAX14-18	5.7159	14	18	1.2	5.84051	5.84051
PtK_GFP-tub_mCh-p50	180903_018_10b_MAX5-15	9.7893	5	15	3	10.2387	10.2387
PtK_GFP-tub_mCh-p50	180903_007_04b_MAX12-18	10.8405	12	18	1.8	10.9889	10.9889
PtK_GFP-tub_mCh-p50	210519_005_05b_MAX11-14	5.88	11	14	0.9	5.94848	5.94848
PtK_GFP-tub_mCh-p50	210519_010_02a_MAX15-20	7.875	15	20	1.5	8.01658	8.01658
PtK_GFP-tub_mCh-p50	190625_006_06b_MAX36-42	4.935	36	42	1.8	5.25302	5.25302
PtK_GFP-tub_mCh-p50	180903_018_03a_MAX29-40	10.512	29	40	3.3	11.0178	11.0178
PtK_GFP-tub_mCh-p50	190625_006_08a_MAX37-44	8.19	37	44	2.1	8.45495	8.45495
PtK_GFP-tub_mCh-p50	180903_007_03b_MAX24-35	11.2347	24	35	3.3	11.7093	11.7093
PtK_GFP-tub_mCh-p50	180903_007_05b_MAX17-26	10.7748	17	26	2.7	11.1079	11.1079
PtK_GFP-tub_mCh-p50	180903_006_05b_MAX13-18	14.0598	13	18	1.5	14.1396	14.1396
PtK_GFP-tub_mCh-p50	180903_006_01a_MAX18-24	7.0956	18	24	1.8	7.32035	7.32035
PtK_GFP-tub_mCh-p50	181005_001_02a_MAX21-24	5.7159	21	24	0.9	5.78632	5.78632
PtK_GFP-tub_mCh-p50	190624_002_03a_MAX7-12	12.39	7	12	1.5	12.4805	12.4805
PtK_GFP-tub_mCh-p50	190624_001_03a_MAX15-27	5.145	15	27	3.6	6.27941	6.27941
PtK_GFP-tub_mCh-p50	181001_002_07a_MAX13-25	6.57	13	25	3.6	7.49166	7.49166
PtK_GFP-tub_mCh-p50	180903_006_05a_MAX18-25	7.1613	18	25	2.1	7.46286	7.46286
PtK_GFP-tub_mCh-p50	190703_014_03b_MAX14-17	11.865	14	17	0.9	11.8991	11.8991
PtK_GFP-tub_mCh-p50	210520_001_02a_MAX15-20	5.67	15	20	1.5	5.86506	5.86506
PtK_GFP-tub_mCh-p50	210519_005_02b_MAX14-18	5.775	14	18	1.2	5.89836	5.89836
PtK_GFP-tub_mCh-p50	210520_001_07b_MAX17-23	6.3	17	23	1.8	6.5521	6.5521
PtK_GFP-tub_mCh-p50	210519_002_07b_MAX14-18	6.825	14	18	1.2	6.92969	6.92969
PtK_GFP-tub_mCh-p50	180903_007_07a_MAX10-15	4.1391	10	15	1.5	4.40252	4.40252
PtK_GFP-tub_mCh-p50	181005_001_10b_MAX23-31	10.2492	23	31	2.4	10.5264	10.5264
PtK_GFP-tub_mCh-p50	190625_006_03a_MAX14-22	7.245	14	22	2.4	7.63217	7.63217
PtK_GFP-tub_mCh-p50	190625_006_01b_MAX5-14	6.93	5	14	2.7	7.4374	7.4374
PtK_GFP-tub_mCh-p50	180817_019_06a_MAX15-19	11.7603	15	19	1.2	11.8214	11.8214
PtK_GFP-tub_mCh-p50	190624_001_01b_MAX5-11	6.825	5	11	1.8	7.05837	7.05837
PtK_GFP-tub_mCh-p50	181005_001_05a_MAX10-17	6.6357	10	17	2.1	6.96007	6.96007
PtK_GFP-tub_mCh-p50	190703_012_07a_MAX28-39	9.66	28	39	3.3	10.2081	10.2081
PtK_GFP-tub_mCh-p50	180903_018_12b_MAX37-44	6.1101	37	44	2.1	6.46091	6.46091
PtK_GFP-tub_mCh-p50	190624_002_04b_MAX17-32	9.345	17	32	4.5	10.372	10.372
PtK_GFP-tub_mCh-p50	180903_018_08a_MAX32-37	6.3729	32	37	1.5	6.54705	6.54705
PtK_GFP-tub_mCh-p50	190703_014_03a_MAX16-24	9.66	16	24	2.4	9.95367	9.95367
PtK_GFP-tub_mCh-p50	210712_003_05b_MAX10-17	6.93	10	17	2.1	7.24119	7.24119
PtK_GFP-tub_mCh-p50	210520_001_06a_MAX5-11	6.93	5	11	1.8	7.15995	7.15995
PtK_GFP-tub_mCh-p50	181001_002_08a_MAX16-24	6.6357	16	24	2.4	7.05638	7.05638
PtK_GFP-tub_mCh-p50	180903_018_01b_MAX8-15	8.8038	8	15	2.1	9.0508	9.0508
PtK_GFP-tub_mCh-p50	210520_001_05a_MAX8-16	12.18	8	16	2.4	12.4142	12.4142
PtK_GFP-tub_mCh-p50	210519_002_04a_MAX8-11	6.51	8	11	0.9	6.57192	6.57192
PtK_GFP-tub_mCh-p50	180817_019_04b_MAX29-34	11.5632	29	34	1.5	11.6601	11.6601
PtK_GFP-tub_mCh-p50	190625_006_03b_MAX8-15	6.825	8	15	2.1	7.14077	7.14077
PtK_GFP-tub_mCh-p50	181001_002_05b_MAX17-27	6.3729	17	27	3	7.04371	7.04371
PtK_GFP-tub_mCh-p50	181001_002_08b_MAX13-20	11.6289	13	20	2.1	11.817	11.817
PtK_GFP-tub_mCh-p50	181005_001_08a_MAX31-36	4.7304	31	36	1.5	4.96253	4.96253
PtK_GFP-tub_mCh-p50	190624_001_02a_MAX22-30	5.25	22	30	2.4	5.77256	5.77256
PtK_GFP-tub_mCh-p50	180903_018_07a_MAX22-28	5.913	22	28	1.8	6.1809	6.1809
PtK_GFP-tub_mCh-p50	190703_014_02a_MAX15-21	6.72	15	21	1.8	6.9569	6.9569
PtK_GFP-tub_mCh-p50	210519_010_02b_MAX13-17	4.095	13	17	1.2	4.2672	4.2672
PtK_GFP-tub_mCh-p50	190624_002_02b_MAX22-30	8.295	22	30	2.4	8.63522	8.63522
PtK_GFP-tub_mCh-p50	190624_002_02a_MAX27-34	3.675	27	34	2.1	4.23269	4.23269
PtK_GFP-tub_mCh-p50	190624_002_05b_MAX14-20	7.245	14	20	1.8	7.46525	7.46525
PtK_GFP-tub_mCh-p50	210519_005_01b_MAX28-32	5.04	28	32	1.2	5.18089	5.18089
PtK_GFP-tub_mCh-p50	181005_001_08b_MAX28-34	6.4386	28	34	1.8	6.68547	6.68547
PtK_GFP-tub_mCh-p50	181005_001_06b_MAX18-32	10.9062	18	32	4.2	11.687	11.687
PtK_GFP-tub_mCh-p50	210712_003_02a_MAX6-10	5.04	6	10	1.2	5.18089	5.18089
PtK_GFP-tub_mCh-p50	190625_006_05b_MAX24-30	4.2	24	30	1.8	4.56946	4.56946
PtK_GFP-tub_mCh-p50	181005_001_01b_MAX13-17	5.1903	13	17	1.2	5.32721	5.32721
PtK_GFP-tub_mCh-p50	181001_002_06a_MAX12-30	11.6289	12	30	5.4	12.8215	12.8215
PtK_GFP-tub_mCh-p50	190625_006_07b_MAX37-43	6.93	37	43	1.8	7.15995	7.15995
PtK_GFP-tub_mCh-p50	210519_010_01b_MAX6-10	8.295	6	10	1.2	8.38135	8.38135
PtK_GFP-tub_mCh-p50	180817_019_02b_MAX32-34	9.9864	32	34	0.6	10.0044	10.0044
PtK_GFP-tub_mCh-p50	181005_001_04b_MAX8-14	6.3072	8	14	1.8	6.55902	6.55902
PtK_GFP-tub_mCh-p50	180903_007_01b_MAX29-31	8.6724	29	31	0.6	8.69313	8.69313
PtK_GFP-tub_mCh-p50	210519_005_05a_MAX12-16	8.085	12	16	1.2	8.17357	8.17357
PtK_GFP-tub_mCh-p50	180903_018_05a_MAX7-11	5.913	7	11	1.2	6.03354	6.03354
PtK_GFP-tub_mCh-p50	210519_010_03a_MAX16-19	5.88	16	19	0.9	5.94848	5.94848
PtK_GFP-tub_mCh-p50	180903_018_06a_MAX20-31	8.2782	20	31	3.3	8.91171	8.91171
PtK_GFP-tub_mCh-p50	210712_003_04a_MAX6-12	6.405	6	12	1.8	6.65312	6.65312
PtK_GFP-tub_mCh-p50	180903_006_06b_MAX15-22	9.5922	15	22	2.1	9.81938	9.81938
PtK_GFP-tub_mCh-p50	180903_007_06a_MAX30-35	4.599	30	35	1.5	4.83744	4.83744
PtK_GFP-tub_mCh-p50	190625_006_06a_MAX35-41	8.82	35	41	1.8	9.0018	9.0018
PtK_GFP-tub_mCh-p50	190703_014_01a_MAX15-22	5.25	15	22	2.1	5.65442	5.65442
PtK_GFP-tub_mCh-p50	180903_007_05a_MAX26-40	8.4096	26	40	4.2	9.40007	9.40007
PtK_GFP-tub_mCh-p50	210520_001_05b_MAX16-23	6.3	16	23	2.1	6.64078	6.64078
PtK_GFP-tub_mCh-p50	181001_002_09b_MAX3-11	13.4028	3	11	2.4	13.616	13.616
PtK_GFP-tub_mCh-p50	181005_001_05b_MAX11-14	4.2048	11	14	0.9	4.30004	4.30004
PtK_GFP-tub_mCh-p50	181005_001_01a_MAX9-17	5.3874	9	17	2.4	5.8978	5.8978
PtK_GFP-tub_mCh-p50	180903_018_01a_MAX16-22	3.1536	16	22	1.8	3.63114	3.63114
PtK_GFP-tub_mCh-p50	210519_002_07a_MAX15-19	10.92	15	19	1.2	10.9857	10.9857
PtK_GFP-tub_mCh-p50	210519_005_04a_MAX28-32	6.93	28	32	1.2	7.03313	7.03313
PtK_GFP-tub_mCh-p50	180903_018_04a_MAX29-34	10.7091	29	34	1.5	10.8136	10.8136
PtK_GFP-tub_mCh-p50	210519_002_05b_MAX10-16	11.76	10	16	1.8	11.897	11.897
PtK_GFP-tub_mCh-p50	210520_001_08b_MAX21-17	9.24	21	17	-1.2	9.3176	9.3176
PtK_GFP-tub_mCh-p50	210519_010_05a_MAX9-11	9.135	9	11	0.6	9.15468	9.15468
PtK_GFP-tub_mCh-p50	190703_012_04b_MAX14-22	5.145	14	22	2.4	5.67724	5.67724
PtK_GFP-tub_mCh-p50	210519_002_05a_MAX8-12	7.98	8	12	1.2	8.06972	8.06972
PtK_GFP-tub_mCh-p50	190625_006_04b_MAX26-29	9.765	26	29	0.9	9.80639	9.80639
PtK_GFP-tub_mCh-p50	180903_018_10a_MAX7-12	4.0077	7	12	1.5	4.27921	4.27921
PtK_GFP-tub_mCh-p50	210712_003_01a_MAX11-15	4.62	11	15	1.2	4.7733	4.7733
PtK_GFP-tub_mCh-p50	190703_012_02b_MAX22-29	10.29	22	29	2.1	10.5021	10.5021
PtK_GFP-tub_mCh-p50	210519_005_03a_MAX15-17	6.09	15	17	0.6	6.11949	6.11949
PtK_GFP-tub_mCh-p50	181001_002_03b_MAX1-8	10.1835	1	8	2.1	10.3978	10.3978

## Sheet: 1F
Condition	# cell_ID	mean_kfiber_length
PtK_GFP-tub	211216_007	7.88047
PtK_GFP-tub	211223_003	6.82513
PtK_GFP-tub	210812_003	7.55878
PtK_GFP-tub	211223_007	10.1517
PtK_GFP-tub	210812_001	8.403
PtK_GFP-tub	211217_007	7.10146
PtK_GFP-tub	210812_002	7.21437
PtK_GFP-tub	211217_001	9.15005
PtK_GFP-tub	211216_002	8.3264
PtK_GFP-tub	211223_005	6.10716
PtK_GFP-tub	210812_000	6.29202
PtK_GFP-tub	211216_008	7.29129
PtK_GFP-tub	210805_005	10.9957
PtK_GFP-tub	211216_001	9.07758
PtK_GFP-tub	211223_001	7.26063
PtK_GFP-tub	211223_009	7.88458
PtK_GFP-tub_mCh-p50	181001_002	8.83276
PtK_GFP-tub_mCh-p50	180817_019	9.71568
PtK_GFP-tub_mCh-p50	180903_018	7.44203
PtK_GFP-tub_mCh-p50	210519_002	7.87854
PtK_GFP-tub_mCh-p50	190703_012	7.78373
PtK_GFP-tub_mCh-p50	190625_006	7.55183
PtK_GFP-tub_mCh-p50	180903_006	9.98958
PtK_GFP-tub_mCh-p50	190624_002	9.18612
PtK_GFP-tub_mCh-p50	180903_007	8.56917
PtK_GFP-tub_mCh-p50	181005_001	7.04715
PtK_GFP-tub_mCh-p50	210712_003	5.7331
PtK_GFP-tub_mCh-p50	210519_010	7.27143
PtK_GFP-tub_mCh-p50	190624_001	5.55005
PtK_GFP-tub_mCh-p50	210520_001	7.01317
PtK_GFP-tub_mCh-p50	190703_014	9.18965
PtK_GFP-tub_mCh-p50	210519_005	6.46309

## Sheet: 1G
Condition	# cell_ID	kfiber_length_std
PtK_GFP-tub	211216_007	1.4991
PtK_GFP-tub	211223_003	1.34324
PtK_GFP-tub	210812_003	0.497472
PtK_GFP-tub	211223_007	0.409575
PtK_GFP-tub	210812_001	0.913714
PtK_GFP-tub	211217_007	1.09004
PtK_GFP-tub	210812_002	1.22399
PtK_GFP-tub	211217_001	0.980121
PtK_GFP-tub	211216_002	2.06169
PtK_GFP-tub	211223_005	1.11486
PtK_GFP-tub	210812_000	1.13281
PtK_GFP-tub	211216_008	1.41046
PtK_GFP-tub	210805_005	1.81038
PtK_GFP-tub	211216_001	0.780284
PtK_GFP-tub	211223_001	1.03225
PtK_GFP-tub	211223_009	0.545626
PtK_GFP-tub_mCh-p50	181001_002	3.052
PtK_GFP-tub_mCh-p50	180817_019	2.51424
PtK_GFP-tub_mCh-p50	180903_018	2.20077
PtK_GFP-tub_mCh-p50	210519_002	2.05764
PtK_GFP-tub_mCh-p50	190703_012	1.96296
PtK_GFP-tub_mCh-p50	190625_006	1.83364
PtK_GFP-tub_mCh-p50	180903_006	2.33899
PtK_GFP-tub_mCh-p50	190624_002	2.75761
PtK_GFP-tub_mCh-p50	180903_007	2.76052
PtK_GFP-tub_mCh-p50	181005_001	2.33839
PtK_GFP-tub_mCh-p50	210712_003	1.47594
PtK_GFP-tub_mCh-p50	210519_010	1.41829
PtK_GFP-tub_mCh-p50	190624_001	1.24942
PtK_GFP-tub_mCh-p50	210520_001	1.90476
PtK_GFP-tub_mCh-p50	190703_014	1.99015
PtK_GFP-tub_mCh-p50	210519_005	0.895959

## Sheet: 1S1
Condition	Cell	MeanIntensity	Phenotype
PtK_GFP-tub_mCh-p50	1	157.27	focused
PtK_GFP-tub_mCh-p50	2	1135.92	unfocused
PtK_GFP-tub_mCh-p50	3	179.472	focused
PtK_GFP-tub_mCh-p50	4	153.682	focused
PtK_GFP-tub_mCh-p50	5	151.215	focused
PtK_GFP-tub_mCh-p50	6	283.531	unfocused
PtK_GFP-tub_mCh-p50	7	605.447	unfocused
PtK_GFP-tub_mCh-p50	8	133.387	focused
PtK_GFP-tub_mCh-p50	9	153.091	focused
PtK_GFP-tub_mCh-p50	10	121.775	focused
PtK_GFP-tub_mCh-p50	11	122.764	focused
PtK_GFP-tub_mCh-p50	12	180.85	focused
PtK_GFP-tub_mCh-p50	13	256.36	unfocused
PtK_GFP-tub_mCh-p50	14	133.745	focused
PtK_GFP-tub_mCh-p50	15	136.123	focused
PtK_GFP-tub_mCh-p50	16	132.062	focused
PtK_GFP-tub_mCh-p50	17	229.092	unfocused
PtK_GFP-tub_mCh-p50	18	137.572	focused
PtK_GFP-tub_mCh-p50	19	137.857	focused
PtK_GFP-tub_mCh-p50	20	174.089	focused
PtK_GFP-tub_mCh-p50	21	184.981	focused
PtK_GFP-tub_mCh-p50	22	133.279	focused
PtK_GFP-tub_mCh-p50	23	131.218	focused

## Sheet: 1S2
Condition	# cellID	kk_distances_in_cell
PtK_GFP-tub	211217_007	2.897	3.226	1.954	2.162
PtK_GFP-tub	211216_002	2.092
PtK_GFP-tub	210805_005	2.596	2.424
PtK_GFP-tub	211217_001	1.775	1.816
PtK_GFP-tub	210812_000	2.596	2.424	1.411	1.455	1.387	2.74
PtK_GFP-tub	211223_003	1.798	1.677
PtK_GFP-tub	211223_001	1.992	1.575	1.686
PtK_GFP-tub	211216_007	3.165
PtK_GFP-tub	211223_005	2.456	3.321
PtK_GFP-tub	211223_009	2.654	2.996	1.486	2.776	1.874	2.318	2.078
PtK_GFP-tub	210812_003	2.433	1.997
PtK_GFP-tub	211216_001	2.712	1.865
PtK_GFP-tub	211223_007	1.877	2.248	2.227	3.166	1.533	1.973
PtK_GFP-tub_mCh-p50	190703_014	3.094	3.811	3.258
PtK_GFP-tub_mCh-p50	180817_019	5.317	3.596	3.215	2.356	4.228
PtK_GFP-tub_mCh-p50	180903_007	2.626	4.515	3.203	2.957	2.555	2.743	3.413	3.105
PtK_GFP-tub_mCh-p50	210519_005	1.834	1.284	1.312	0.913	1.559	1.598	1.121	1.365	1.681	1.511	1.192
PtK_GFP-tub_mCh-p50	190625_006	1.414	1.986	2.044	1.202	1.42	1.683	1.959	1.041	1.324	1.273	1.687
PtK_GFP-tub_mCh-p50	210712_003	1.361	1.33	1.205	1.184	1.913	2.072
PtK_GFP-tub_mCh-p50	190703_012	2.689	1.66	1.498	2.496	1.807	2.283	1.778	2.241	2.303
PtK_GFP-tub_mCh-p50	190624_001	1.785	1.785	1.55	1.409	1.277	2.067	1.569	1.573
PtK_GFP-tub_mCh-p50	180903_006	3.542	4.897	3.741	3.259	3.597	2.741	3.602
PtK_GFP-tub_mCh-p50	180903_018	2.756	2.027	2.8	1.745	2.494	2.542	3.316	2.381	2.077
PtK_GFP-tub_mCh-p50	210520_001	2.564	1.658	2.401	2.243	1.914	1.291
PtK_GFP-tub_mCh-p50	181005_001	3.178	2.991	2.899	2.822	1.298	2.093	3.018	3.238	3.931	2.312	3.52
PtK_GFP-tub_mCh-p50	210519_002	4.035	2.954	2.7	2.058	2.599	2.535
PtK_GFP-tub_mCh-p50	190624_002	2.352	2.108	2.564	2.756	1.864	2.036	1.262	1.759
PtK_GFP-tub_mCh-p50	210519_010	2.32	2.329	3.172	2.27
PtK_GFP-tub_mCh-p50	181001_002	2.142	1.953	1.834	2.25	1.72	2.281	3.217	2.233	1.713	2.673	1.894

## Sheet: 1S4
Condition	centrosome_radius
PtK_GFP-tub	1.04381
PtK_GFP-tub	0.865258
PtK_GFP-tub	0.988478
PtK_GFP-tub	1.15519
PtK_GFP-tub	0.86612
PtK_GFP-tub	0.868471
PtK_GFP-tub	0.932589
PtK_GFP-tub	0.916682
PtK_GFP-tub	0.819911
PtK_GFP-tub	1.04379
PtK_GFP-tub	1.02072
PtK_GFP-tub	0.935211
PtK_GFP-tub	0.939806
PtK_GFP-tub	0.990123
PtK_GFP-tub	0.892882
PtK_GFP-tub	0.954477
PtK_GFP-tub	1.1434
PtK_GFP-tub	1.04401
PtK_GFP-tub	1.01849
PtK_GFP-tub	0.883466
PtK_GFP-tub	1.00494
PtK_GFP-tub	1.05998
PtK_GFP-tub	1.08617
PtK_GFP-tub	0.843795
PtK_GFP-tub	0.885818
PtK_GFP-tub	0.878779
PtK_GFP-tub	0.790084
PtK_GFP-tub	0.969859
PtK_GFP-tub	0.964348
PtK_GFP-tub	0.974925
PtK_GFP-tub	1.15982
PtK_GFP-tub	1.21263

## Sheet: 1S5-XYCoordinates
Condition	K-fiber_ID	X1	Y1	X2	Y2	X3	Y3	X4	Y4	X5	Y5	X6	Y6	X7	Y7	X8	Y8	X9	Y9	X10	Y10	X11	Y11	X12	Y12	X13	Y13	X14	Y14	X15	Y15	X16	Y16	X17	Y17	X18	Y18	X19	Y19	X20	Y20	X21	Y21	X22	Y22	X23	Y23	X24	Y24
PtK_GFP-tub	210805_005_01a_MAX12-21	174.833	294.5	174.44	295.875	174.075	297.228	173.768	298.535	173.549	299.776	173.441	300.93	173.428	302.009	173.465	303.046	173.508	304.075	173.528	305.11	173.524	306.134	173.501	307.126	173.469	308.068	173.457	308.973	173.502	309.857	173.621	310.733	173.76	311.58	173.849	312.377	173.859	313.136	173.837	313.936	173.834	314.853	173.846	315.849	173.844	316.826	173.803	317.693
PtK_GFP-tub	210805_005_01b_MAX20-23	171	274.5	171.27	273.358	171.54	272.215	171.811	271.073	172.083	269.931	172.356	268.788	172.63	267.646	172.906	266.503	173.184	265.36	173.464	264.217	173.747	263.074	174.033	261.931	174.322	260.788	174.614	259.644	174.91	258.5	175.21	257.356	175.514	256.212	175.822	255.067	176.136	253.923	176.455	252.777	176.779	251.632	177.108	250.486	177.444	249.34	177.786	248.194
PtK_GFP-tub	210805_005_03a_MAX20-26	205.667	283.333	205.537	284.376	205.406	285.418	205.276	286.46	205.146	287.503	205.015	288.545	204.883	289.587	204.752	290.629	204.619	291.672	204.486	292.714	204.353	293.756	204.218	294.798	204.083	295.84	203.946	296.882	203.809	297.923	203.67	298.965	203.53	300.007	203.389	301.048	203.246	302.09	203.102	303.131	202.956	304.173	202.809	305.214	202.66	306.255	202.509	307.296
PtK_GFP-tub	210805_005_03b_MAX21-27	194.25	256.5	194.429	255.604	194.609	254.708	194.788	253.812	194.969	252.916	195.15	252.019	195.331	251.123	195.514	250.225	195.698	249.327	195.883	248.428	196.069	247.529	196.258	246.629	196.447	245.728	196.639	244.826	196.833	243.923	197.029	243.018	197.228	242.113	197.429	241.206	197.633	240.298	197.84	239.389	198.05	238.478	198.263	237.565	198.479	236.651	198.699	235.735
PtK_GFP-tub	210805_005_04a_MAX14-29	237.833	288.5	237.459	289.556	237.084	290.613	236.708	291.669	236.333	292.725	235.956	293.781	235.579	294.837	235.201	295.892	234.822	296.948	234.441	298.003	234.059	299.057	233.675	300.111	233.29	301.165	232.903	302.218	232.513	303.271	232.121	304.323	231.727	305.374	231.33	306.425	230.931	307.475	230.528	308.524	230.123	309.573	229.714	310.621	229.302	311.668	228.886	312.713
PtK_GFP-tub	210805_005_04b_MAX30-34	224.5	253	224.894	251.914	225.288	250.829	225.682	249.743	226.074	248.658	226.466	247.574	226.856	246.49	227.245	245.407	227.632	244.324	228.018	243.242	228.401	242.162	228.781	241.082	229.159	240.004	229.533	238.927	229.905	237.852	230.273	236.778	230.637	235.706	230.997	234.636	231.353	233.567	231.704	232.501	232.051	231.437	232.393	230.375	232.729	229.316	233.06	228.259
PtK_GFP-tub	210805_005_05a_MAX11-27	236.5	290	236.419	291.405	236.327	292.757	236.215	294.005	236.073	295.095	235.891	295.982	235.691	296.711	235.518	297.405	235.403	298.171	235.28	299.009	235.047	299.879	234.625	300.749	234.068	301.635	233.48	302.569	232.964	303.584	232.594	304.693	232.34	305.846	232.156	306.981	231.994	308.035	231.806	308.971	231.543	309.84	231.155	310.713	230.603	311.655	229.935	312.658
PtK_GFP-tub	210805_005_05b_MAX20-31	220	283	220.882	281.742	221.763	280.483	222.643	279.224	223.522	277.963	224.398	276.701	225.27	275.437	226.139	274.17	227.003	272.9	227.863	271.627	228.717	270.35	229.564	269.07	230.405	267.784	231.238	266.494	232.063	265.199	232.88	263.897	233.687	262.59	234.484	261.276	235.27	259.955	236.045	258.627	236.808	257.29	237.559	255.946	238.296	254.593	239.02	253.231
PtK_GFP-tub	210812_000_01a_MAX22-23	223	312.5	223.136	312.883	223.273	313.266	223.409	313.65	223.546	314.033	223.684	314.416	223.822	314.799	223.96	315.182	224.1	315.565	224.24	315.948	224.381	316.331	224.524	316.714	224.667	317.096	224.812	317.479	224.958	317.861	225.106	318.244	225.256	318.626	225.407	319.008	225.56	319.39	225.715	319.772	225.873	320.153	226.032	320.535	226.194	320.916	226.358	321.297
PtK_GFP-tub	210812_000_01b_MAX21-24	214.25	283.75	214.04	282.97	213.83	282.189	213.62	281.409	213.411	280.628	213.203	279.848	212.995	279.067	212.788	278.286	212.583	277.505	212.379	276.724	212.176	275.943	211.976	275.161	211.776	274.379	211.579	273.597	211.385	272.814	211.192	272.031	211.002	271.248	210.815	270.464	210.63	269.68	210.449	268.896	210.271	268.111	210.096	267.325	209.924	266.539	209.757	265.752
PtK_GFP-tub	210812_000_02a_MAX21-23	219.125	277	219.181	277.608	219.238	278.216	219.295	278.824	219.353	279.432	219.412	280.041	219.471	280.651	219.533	281.261	219.595	281.872	219.66	282.484	219.727	283.098	219.796	283.712	219.867	284.328	219.941	284.945	220.018	285.563	220.099	286.184	220.182	286.806	220.27	287.43	220.361	288.056	220.456	288.684	220.556	289.314	220.66	289.947	220.769	290.582	220.883	291.22
PtK_GFP-tub	210812_000_02b_MAX21-25	206.625	263.375	206.522	262.719	206.418	262.062	206.315	261.406	206.213	260.75	206.111	260.093	206.009	259.436	205.909	258.779	205.809	258.122	205.71	257.465	205.613	256.807	205.516	256.149	205.421	255.491	205.328	254.833	205.236	254.174	205.147	253.514	205.059	252.854	204.973	252.194	204.889	251.533	204.808	250.872	204.729	250.21	204.652	249.547	204.579	248.884	204.508	248.22
PtK_GFP-tub	210812_000_03a_MAX20-25	233.667	286.167	233.892	286.569	234.117	286.972	234.342	287.376	234.567	287.781	234.793	288.188	235.019	288.597	235.245	289.009	235.471	289.423	235.698	289.841	235.926	290.262	236.154	290.688	236.383	291.119	236.613	291.555	236.843	291.996	237.074	292.443	237.306	292.896	237.538	293.356	237.772	293.824	238.007	294.299	238.243	294.782	238.48	295.273	238.718	295.774	238.958	296.283
PtK_GFP-tub	210812_000_03b_MAX21-24	224.833	258	224.699	257.487	224.565	256.974	224.431	256.46	224.297	255.947	224.163	255.434	224.029	254.92	223.895	254.407	223.762	253.893	223.628	253.38	223.494	252.866	223.361	252.352	223.228	251.838	223.095	251.324	222.962	250.81	222.829	250.296	222.696	249.781	222.564	249.267	222.431	248.752	222.299	248.237	222.168	247.722	222.036	247.207	221.905	246.691	221.774	246.175
PtK_GFP-tub	210812_000_04a_MAX24-29	223.875	271.75	224.093	272.655	224.311	273.56	224.528	274.465	224.746	275.37	224.964	276.275	225.182	277.18	225.4	278.085	225.618	278.99	225.835	279.894	226.053	280.799	226.271	281.703	226.489	282.607	226.707	283.511	226.925	284.415	227.143	285.319	227.361	286.223	227.579	287.126	227.797	288.029	228.015	288.932	228.233	289.835	228.452	290.737	228.67	291.639	228.888	292.541
PtK_GFP-tub	210812_000_04b_MAX24-28	219.5	266.583	219.356	266	219.211	265.416	219.067	264.832	218.923	264.248	218.779	263.663	218.636	263.079	218.492	262.495	218.35	261.91	218.207	261.325	218.065	260.739	217.924	260.154	217.784	259.568	217.644	258.981	217.505	258.394	217.367	257.807	217.229	257.219	217.093	256.631	216.958	256.042	216.823	255.453	216.69	254.863	216.558	254.272	216.428	253.681	216.298	253.089
PtK_GFP-tub	210812_000_05a_MAX27-28	256.625	291.5	256.626	292.128	256.626	292.757	256.627	293.385	256.627	294.014	256.627	294.642	256.626	295.269	256.626	295.897	256.625	296.524	256.623	297.151	256.621	297.778	256.618	298.404	256.615	299.029	256.611	299.654	256.606	300.278	256.601	300.902	256.594	301.525	256.587	302.147	256.578	302.769	256.568	303.39	256.558	304.01	256.546	304.628	256.533	305.247	256.519	305.863
PtK_GFP-tub	210812_000_05b_MAX26-28	245.667	266	245.528	265.186	245.389	264.373	245.25	263.56	245.11	262.747	244.969	261.935	244.827	261.124	244.683	260.314	244.537	259.505	244.389	258.698	244.239	257.892	244.086	257.087	243.93	256.285	243.77	255.484	243.608	254.686	243.442	253.89	243.272	253.096	243.097	252.305	242.918	251.517	242.734	250.732	242.546	249.951	242.351	249.172	242.152	248.397	241.946	247.626
PtK_GFP-tub	210812_000_06a_MAX29-36	243.667	275.167	243.787	275.757	243.908	276.348	244.028	276.939	244.149	277.531	244.269	278.123	244.388	278.715	244.508	279.308	244.627	279.902	244.745	280.497	244.863	281.092	244.981	281.689	245.098	282.287	245.214	282.887	245.329	283.488	245.444	284.09	245.558	284.694	245.671	285.3	245.782	285.908	245.893	286.518	246.003	287.13	246.111	287.744	246.219	288.361	246.325	288.98
PtK_GFP-tub	210812_000_06b_MAX29-36	208	276.5	207.867	275.603	207.734	274.706	207.601	273.809	207.469	272.912	207.338	272.016	207.207	271.12	207.077	270.226	206.949	269.331	206.822	268.438	206.696	267.545	206.572	266.654	206.451	265.764	206.331	264.875	206.213	263.987	206.097	263.101	205.984	262.217	205.874	261.334	205.767	260.453	205.663	259.574	205.561	258.697	205.464	257.822	205.37	256.949	205.279	256.078
PtK_GFP-tub	210812_000_07a_MAX34-37	246.167	279	246.351	279.689	246.536	280.379	246.72	281.068	246.904	281.758	247.087	282.447	247.268	283.136	247.448	283.826	247.627	284.515	247.804	285.204	247.98	285.894	248.153	286.583	248.323	287.272	248.491	287.962	248.656	288.651	248.819	289.34	248.977	290.029	249.133	290.719	249.285	291.408	249.433	292.097	249.577	292.786	249.716	293.475	249.851	294.164	249.981	294.853
PtK_GFP-tub	210812_000_07b_MAX34-38	245.833	263.167	245.706	262.428	245.579	261.689	245.452	260.951	245.324	260.213	245.195	259.475	245.066	258.738	244.936	258.002	244.805	257.266	244.673	256.531	244.539	255.798	244.404	255.066	244.268	254.334	244.13	253.605	243.99	252.876	243.848	252.15	243.704	251.425	243.557	250.702	243.408	249.981	243.257	249.262	243.103	248.545	242.946	247.831	242.786	247.119	242.623	246.41
PtK_GFP-tub	210812_001_01a_MAX19-22	239.5	218.5	240.003	217.545	240.495	216.619	240.967	215.751	241.408	214.968	241.807	214.301	242.154	213.775	242.459	213.353	242.751	212.927	243.06	212.385	243.404	211.663	243.771	210.801	244.145	209.854	244.51	208.877	244.851	207.927	245.152	207.057	245.424	206.278	245.699	205.558	246.011	204.866	246.394	204.17	246.877	203.441	247.445	202.672	248.063	201.864	248.696	201.022
PtK_GFP-tub	210812_001_01b_MAX25-34	234	249.75	234.14	250.601	234.28	251.453	234.421	252.305	234.562	253.159	234.705	254.013	234.85	254.869	234.997	255.727	235.146	256.587	235.298	257.449	235.453	258.314	235.611	259.182	235.773	260.054	235.94	260.929	236.11	261.808	236.285	262.691	236.466	263.579	236.652	264.471	236.843	265.369	237.041	266.272	237.245	267.181	237.456	268.096	237.674	269.017	237.9	269.945
PtK_GFP-tub	210812_001_02a_MAX16-22	258.5	223.167	258.62	222.346	258.74	221.526	258.861	220.705	258.981	219.885	259.103	219.064	259.225	218.243	259.348	217.423	259.471	216.602	259.596	215.781	259.722	214.96	259.849	214.139	259.978	213.318	260.108	212.496	260.24	211.675	260.374	210.854	260.51	210.032	260.647	209.21	260.788	208.388	260.93	207.566	261.075	206.744	261.223	205.921	261.373	205.099	261.526	204.276
PtK_GFP-tub	210812_001_02b_MAX23-33	261.833	242.5	261.385	243.25	260.937	244.002	260.491	244.754	260.046	245.509	259.605	246.266	259.167	247.026	258.733	247.791	258.304	248.56	257.88	249.335	257.463	250.116	257.053	250.904	256.65	251.699	256.256	252.502	255.87	253.314	255.494	254.135	255.129	254.966	254.775	255.808	254.432	256.662	254.102	257.528	253.786	258.406	253.482	259.299	253.194	260.205	252.921	261.126
PtK_GFP-tub	210812_001_03a_MAX17-21	274	214	274.161	213.165	274.317	212.338	274.464	211.526	274.595	210.737	274.707	209.978	274.794	209.257	274.851	208.581	274.879	207.946	274.884	207.334	274.873	206.724	274.853	206.096	274.831	205.431	274.813	204.717	274.801	203.966	274.796	203.196	274.798	202.423	274.809	201.665	274.829	200.939	274.859	200.258	274.89	199.616	274.909	198.998	274.905	198.389	274.865	197.772
PtK_GFP-tub	210812_001_03b_MAX27-35	278	274	277.479	274.958	276.971	275.912	276.487	276.857	276.04	277.791	275.641	278.709	275.303	279.606	275.039	280.48	274.859	281.325	274.775	282.139	274.778	282.93	274.851	283.708	274.979	284.486	275.144	285.275	275.331	286.087	275.522	286.933	275.7	287.817	275.845	288.713	275.935	289.594	275.948	290.432	275.865	291.198	275.663	291.864	275.322	292.402	274.856	292.821
PtK_GFP-tub	210812_001_05a_MAX22-25	294.167	224.167	294.096	223.254	294.025	222.341	293.954	221.428	293.882	220.515	293.811	219.603	293.74	218.691	293.668	217.78	293.596	216.869	293.524	215.959	293.452	215.049	293.379	214.141	293.305	213.233	293.232	212.326	293.158	211.421	293.083	210.516	293.008	209.613	292.933	208.711	292.857	207.81	292.78	206.911	292.702	206.013	292.625	205.117	292.546	204.223	292.466	203.331
PtK_GFP-tub	210812_001_05b_MAX25-35	296.75	258	296.431	258.694	296.111	259.389	295.792	260.083	295.473	260.778	295.153	261.473	294.832	262.169	294.512	262.865	294.191	263.562	293.869	264.26	293.547	264.959	293.224	265.658	292.901	266.359	292.577	267.061	292.251	267.764	291.925	268.468	291.598	269.174	291.27	269.882	290.941	270.591	290.611	271.302	290.279	272.015	289.946	272.729	289.612	273.446	289.276	274.165
PtK_GFP-tub	210812_001_06a_MAX17-24	313.667	213.333	313.365	212.469	313.064	211.604	312.763	210.74	312.462	209.876	312.161	209.012	311.86	208.149	311.559	207.287	311.258	206.425	310.957	205.565	310.657	204.705	310.356	203.846	310.056	202.989	309.755	202.133	309.455	201.279	309.156	200.426	308.856	199.574	308.556	198.725	308.257	197.877	307.958	197.031	307.659	196.188	307.361	195.347	307.062	194.508	306.764	193.671
PtK_GFP-tub	210812_001_06b_MAX25-35	306.5	261.167	306.274	262.11	306.048	263.053	305.82	263.995	305.592	264.937	305.361	265.878	305.128	266.818	304.892	267.757	304.653	268.694	304.411	269.63	304.163	270.563	303.912	271.495	303.655	272.424	303.392	273.351	303.124	274.276	302.849	275.197	302.567	276.115	302.277	277.03	301.979	277.941	301.673	278.848	301.358	279.752	301.034	280.651	300.699	281.546	300.355	282.437
PtK_GFP-tub	210812_002_01a_MAX19-25	225	264	225.001	265.178	225.002	266.322	225.002	267.396	225.001	268.368	224.999	269.203	224.997	269.923	224.995	270.659	224.998	271.554	225.006	272.738	225.028	274.182	225.073	275.728	225.152	277.216	225.275	278.484	225.452	279.371	225.693	279.77	225.999	279.999	226.358	280.481	226.744	281.247	227.122	282.222	227.458	283.337	227.725	284.519	227.934	285.715	228.11	286.873
PtK_GFP-tub	210812_002_01b_MAX21-26	231	248.25	231.314	247.578	231.627	246.907	231.941	246.236	232.256	245.564	232.571	244.893	232.886	244.223	233.203	243.553	233.52	242.883	233.838	242.214	234.157	241.546	234.477	240.878	234.799	240.211	235.122	239.545	235.447	238.879	235.773	238.215	236.101	237.552	236.431	236.889	236.763	236.228	237.098	235.569	237.434	234.91	237.774	234.253	238.115	233.597	238.459	232.943
PtK_GFP-tub	210812_002_02a_MAX16-22	235	268	235.001	269.14	235.002	270.248	235.002	271.294	235.001	272.247	235	273.076	234.997	273.784	234.995	274.481	234.996	275.295	235.002	276.353	235.018	277.687	235.053	279.166	235.116	280.645	235.216	281.978	235.363	283.019	235.566	283.626	235.83	283.867	236.151	284.172	236.514	284.763	236.888	285.591	237.243	286.591	237.548	287.697	237.787	288.85	237.979	290.002
PtK_GFP-tub	210812_002_02b_MAX16-22	239.75	248.25	239.814	247.488	239.878	246.726	239.943	245.964	240.008	245.203	240.075	244.442	240.142	243.682	240.211	242.922	240.282	242.163	240.354	241.404	240.429	240.647	240.506	239.89	240.585	239.135	240.668	238.38	240.753	237.627	240.841	236.875	240.934	236.125	241.03	235.377	241.129	234.63	241.233	233.884	241.342	233.141	241.455	232.4	241.573	231.66	241.696	230.923
PtK_GFP-tub	210812_002_03a_MAX19-22	261.167	257.333	260.99	258.079	260.814	258.825	260.638	259.572	260.463	260.318	260.29	261.064	260.118	261.811	259.947	262.558	259.779	263.305	259.613	264.052	259.45	264.8	259.29	265.548	259.134	266.297	258.98	267.046	258.831	267.795	258.686	268.545	258.545	269.296	258.41	270.047	258.279	270.798	258.154	271.551	258.034	272.304	257.92	273.058	257.813	273.813	257.712	274.568
PtK_GFP-tub	210812_002_03b_MAX23-28	258.167	238.667	258.262	238.07	258.357	237.474	258.452	236.878	258.548	236.282	258.643	235.686	258.739	235.09	258.835	234.495	258.931	233.901	259.028	233.307	259.125	232.713	259.222	232.12	259.32	231.528	259.418	230.937	259.517	230.347	259.616	229.757	259.717	229.169	259.817	228.581	259.919	227.995	260.021	227.41	260.124	226.826	260.228	226.243	260.332	225.662	260.438	225.082
PtK_GFP-tub	210812_002_05a_MAX28-33	286.375	267.875	286.358	268.525	286.341	269.175	286.324	269.825	286.307	270.475	286.289	271.125	286.271	271.776	286.253	272.428	286.234	273.079	286.214	273.731	286.194	274.384	286.173	275.037	286.151	275.691	286.128	276.346	286.104	277.001	286.079	277.658	286.053	278.315	286.026	278.973	285.997	279.633	285.967	280.293	285.936	280.955	285.903	281.618	285.868	282.282	285.832	282.948
PtK_GFP-tub	210812_002_05b_MAX19-24	293.667	263.5	293.463	262.472	293.259	261.443	293.056	260.416	292.852	259.388	292.649	258.362	292.445	257.336	292.241	256.312	292.038	255.289	291.835	254.267	291.632	253.247	291.428	252.229	291.225	251.212	291.022	250.198	290.82	249.187	290.617	248.178	290.414	247.171	290.212	246.168	290.01	245.168	289.808	244.171	289.606	243.178	289.404	242.188	289.203	241.202	289.002	240.22
PtK_GFP-tub	210812_002_06a_MAX22-27	298.5	289	298.379	289.622	298.257	290.244	298.136	290.866	298.014	291.488	297.892	292.109	297.77	292.729	297.647	293.349	297.524	293.969	297.4	294.588	297.276	295.206	297.15	295.823	297.025	296.439	296.898	297.054	296.77	297.668	296.642	298.281	296.512	298.892	296.382	299.502	296.25	300.11	296.117	300.717	295.982	301.322	295.846	301.925	295.709	302.526	295.57	303.125
PtK_GFP-tub	210812_002_06b_MAX22-28	303.5	259.333	303.449	258.46	303.397	257.587	303.344	256.714	303.291	255.841	303.237	254.968	303.181	254.094	303.123	253.22	303.063	252.346	303	251.472	302.935	250.597	302.866	249.722	302.794	248.847	302.718	247.971	302.638	247.095	302.554	246.218	302.465	245.34	302.372	244.462	302.272	243.583	302.168	242.704	302.057	241.824	301.94	240.943	301.817	240.061	301.686	239.179
PtK_GFP-tub	210812_003_02a_MAX25-38	265.333	254.667	265.834	254.311	266.336	253.955	266.837	253.6	267.339	253.245	267.841	252.891	268.344	252.538	268.848	252.185	269.352	251.834	269.858	251.484	270.364	251.136	270.871	250.789	271.38	250.445	271.89	250.102	272.401	249.761	272.914	249.423	273.429	249.087	273.946	248.753	274.464	248.423	274.985	248.095	275.508	247.771	276.033	247.45	276.56	247.132	277.09	246.818
PtK_GFP-tub	210812_003_02b_MAX25-38	249.5	254.833	248.689	255.137	247.879	255.442	247.068	255.747	246.259	256.053	245.451	256.36	244.643	256.668	243.838	256.979	243.034	257.292	242.232	257.607	241.431	257.925	240.634	258.247	239.839	258.571	239.047	258.9	238.259	259.232	237.473	259.569	236.692	259.911	235.914	260.258	235.14	260.61	234.371	260.967	233.606	261.331	232.846	261.701	232.092	262.077	231.342	262.461
PtK_GFP-tub	210812_003_03b_MAX34-39	247.25	261.25	246.548	261.579	245.846	261.908	245.144	262.237	244.442	262.567	243.739	262.898	243.036	263.23	242.332	263.563	241.628	263.898	240.923	264.234	240.218	264.573	239.512	264.914	238.805	265.257	238.097	265.603	237.388	265.951	236.678	266.303	235.966	266.658	235.254	267.017	234.54	267.379	233.825	267.746	233.108	268.116	232.39	268.491	231.67	268.871	230.948	269.255
PtK_GFP-tub	210812_003_04a_MAX23-29	271.333	284.667	271.909	284.369	272.484	284.072	273.06	283.774	273.635	283.475	274.211	283.176	274.786	282.877	275.361	282.576	275.937	282.275	276.512	281.973	277.087	281.669	277.662	281.363	278.237	281.057	278.812	280.748	279.387	280.438	279.962	280.126	280.537	279.811	281.111	279.495	281.686	279.176	282.261	278.854	282.835	278.53	283.409	278.203	283.983	277.873	284.558	277.54
PtK_GFP-tub	210812_003_04b_MAX34-39	248	262.25	247.235	262.509	246.471	262.769	245.706	263.029	244.942	263.289	244.179	263.55	243.417	263.812	242.656	264.076	241.896	264.341	241.138	264.607	240.381	264.875	239.626	265.145	238.872	265.417	238.121	265.692	237.372	265.969	236.626	266.249	235.882	266.532	235.141	266.818	234.403	267.108	233.668	267.4	232.937	267.697	232.209	267.998	231.484	268.302	230.764	268.611
PtK_GFP-tub	210812_003_06a_MAX23-30	281.5	301.5	281.969	300.921	282.437	300.341	282.906	299.761	283.375	299.181	283.843	298.601	284.312	298.021	284.781	297.44	285.25	296.858	285.719	296.277	286.188	295.695	286.658	295.112	287.127	294.528	287.597	293.944	288.066	293.359	288.536	292.773	289.007	292.186	289.477	291.598	289.948	291.009	290.419	290.419	290.89	289.828	291.361	289.236	291.833	288.642	292.305	288.047
PtK_GFP-tub	210812_003_06b_MAX32-38	268.375	296.25	267.569	296.461	266.762	296.672	265.956	296.883	265.15	297.094	264.344	297.305	263.538	297.516	262.732	297.726	261.927	297.936	261.122	298.145	260.317	298.354	259.512	298.563	258.708	298.771	257.904	298.979	257.101	299.186	256.299	299.392	255.496	299.598	254.695	299.803	253.894	300.007	253.093	300.21	252.293	300.413	251.494	300.614	250.696	300.815	249.898	301.014
PtK_GFP-tub	211216_001_01a_MAX 14-24	271	271.5	270.208	270.916	269.416	270.334	268.622	269.752	267.825	269.173	267.026	268.596	266.221	268.023	265.412	267.454	264.598	266.89	263.776	266.331	262.947	265.779	262.11	265.234	261.263	264.697	260.406	264.167	259.539	263.647	258.66	263.137	257.769	262.637	256.864	262.148	255.945	261.671	255.011	261.207	254.061	260.756	253.094	260.319	252.111	259.896	251.112	259.486
PtK_GFP-tub	211216_001_01b_MAX 20-25	292.167	273.167	292.747	273.999	293.328	274.832	293.909	275.667	294.491	276.503	295.073	277.342	295.655	278.184	296.239	279.029	296.823	279.88	297.408	280.735	297.995	281.596	298.582	282.463	299.172	283.337	299.762	284.219	300.355	285.109	300.949	286.008	301.545	286.916	302.142	287.833	302.741	288.758	303.341	289.691	303.943	290.631	304.545	291.577	305.147	292.529	305.75	293.486
PtK_GFP-tub	211216_001_02a_MAX 12-17	248	280	247.16	279.421	246.32	278.841	245.481	278.262	244.641	277.683	243.803	277.105	242.965	276.527	242.127	275.949	241.291	275.371	240.456	274.794	239.622	274.218	238.789	273.642	237.958	273.067	237.128	272.493	236.3	271.92	235.474	271.348	234.65	270.776	233.828	270.206	233.008	269.637	232.19	269.069	231.375	268.502	230.563	267.937	229.754	267.373	228.947	266.81
PtK_GFP-tub	211216_001_02b_MAX 17-25	270	292	270.804	292.572	271.607	293.143	272.411	293.715	273.214	294.287	274.017	294.86	274.819	295.433	275.62	296.007	276.42	296.581	277.22	297.157	278.019	297.733	278.816	298.31	279.612	298.889	280.407	299.469	281.2	300.05	281.992	300.633	282.781	301.217	283.57	301.803	284.356	302.391	285.139	302.981	285.921	303.572	286.701	304.166	287.478	304.762	288.252	305.361
PtK_GFP-tub	211216_001_03a_MAX 20-28	240	295	239.408	294.274	238.817	293.549	238.225	292.823	237.633	292.098	237.042	291.373	236.45	290.648	235.859	289.923	235.268	289.199	234.676	288.476	234.085	287.753	233.495	287.03	232.904	286.308	232.314	285.587	231.723	284.867	231.133	284.147	230.543	283.429	229.954	282.711	229.365	281.994	228.776	281.279	228.187	280.564	227.599	279.851	227.011	279.139	226.424	278.428
PtK_GFP-tub	211216_001_03b_MAX 20-27	253.5	303.5	253.918	304.269	254.337	305.038	254.757	305.807	255.177	306.575	255.599	307.342	256.023	308.109	256.449	308.874	256.877	309.639	257.308	310.402	257.743	311.163	258.181	311.923	258.623	312.68	259.069	313.436	259.52	314.189	259.976	314.94	260.438	315.689	260.904	316.434	261.378	317.177	261.857	317.917	262.344	318.653	262.837	319.386	263.338	320.115	263.847	320.84
PtK_GFP-tub	211216_001_04a_MAX 13-19	225	307	224.198	306.205	223.396	305.41	222.595	304.616	221.795	303.821	220.996	303.026	220.198	302.232	219.403	301.437	218.609	300.643	217.818	299.849	217.029	299.055	216.243	298.261	215.461	297.467	214.682	296.674	213.906	295.88	213.135	295.087	212.369	294.294	211.607	293.502	210.85	292.71	210.098	291.918	209.352	291.126	208.612	290.335	207.878	289.544	207.151	288.753
PtK_GFP-tub	211216_001_04b_MAX 20-25	255	335	255.614	335.392	256.229	335.784	256.844	336.176	257.459	336.567	258.075	336.958	258.692	337.349	259.31	337.738	259.93	338.127	260.551	338.515	261.173	338.901	261.798	339.287	262.425	339.671	263.053	340.054	263.684	340.435	264.318	340.815	264.955	341.193	265.594	341.568	266.237	341.942	266.883	342.314	267.533	342.683	268.186	343.05	268.843	343.415	269.504	343.777
PtK_GFP-tub	211216_002_01a_MAX 18-23	226	225	225.821	226.043	225.643	227.085	225.465	228.129	225.287	229.172	225.111	230.216	224.934	231.26	224.759	232.306	224.585	233.352	224.413	234.399	224.242	235.447	224.073	236.497	223.905	237.548	223.739	238.6	223.576	239.654	223.415	240.71	223.257	241.767	223.101	242.827	222.948	243.888	222.798	244.952	222.651	246.019	222.508	247.088	222.368	248.159	222.232	249.233
PtK_GFP-tub	211216_002_01b_MAX 20-23	237	187	237.17	186.497	237.34	185.994	237.51	185.49	237.681	184.988	237.852	184.485	238.024	183.983	238.196	183.481	238.369	182.98	238.543	182.479	238.719	181.979	238.895	181.48	239.072	180.981	239.251	180.483	239.432	179.987	239.614	179.491	239.797	178.996	239.983	178.503	240.17	178.011	240.359	177.52	240.551	177.03	240.745	176.542	240.941	176.055	241.14	175.57
PtK_GFP-tub	211216_002_02a_MAX 18-23	237	251	236.788	251.983	236.576	252.966	236.364	253.948	236.153	254.931	235.942	255.913	235.732	256.895	235.522	257.877	235.313	258.859	235.105	259.84	234.898	260.821	234.691	261.801	234.487	262.781	234.283	263.76	234.081	264.738	233.88	265.716	233.681	266.694	233.483	267.67	233.288	268.646	233.094	269.621	232.903	270.595	232.713	271.568	232.526	272.54	232.341	273.511
PtK_GFP-tub	211216_002_02b_MAX 18-22	257.5	208	257.57	207.336	257.64	206.672	257.711	206.007	257.781	205.343	257.851	204.679	257.922	204.016	257.992	203.352	258.063	202.689	258.134	202.026	258.205	201.363	258.276	200.701	258.347	200.039	258.419	199.377	258.49	198.716	258.562	198.055	258.635	197.395	258.707	196.736	258.78	196.077	258.853	195.418	258.926	194.76	259	194.103	259.074	193.447	259.148	192.791
PtK_GFP-tub	211216_002_03a_MAX 13-21	261	236	260.598	237.229	260.197	238.458	259.795	239.687	259.394	240.916	258.993	242.144	258.592	243.371	258.191	244.598	257.791	245.823	257.392	247.048	256.993	248.271	256.595	249.493	256.197	250.714	255.8	251.933	255.404	253.15	255.009	254.366	254.615	255.579	254.222	256.791	253.83	258	253.439	259.207	253.049	260.411	252.661	261.612	252.274	262.811	251.888	264.007
PtK_GFP-tub	211216_002_03b_MAX 18-23	265	208	265.408	207.422	265.815	206.845	266.222	206.266	266.627	205.688	267.031	205.108	267.432	204.527	267.831	203.945	268.226	203.362	268.618	202.777	269.006	202.19	269.39	201.601	269.769	201.01	270.142	200.416	270.51	199.82	270.872	199.22	271.227	198.618	271.575	198.012	271.916	197.403	272.249	196.791	272.573	196.174	272.889	195.553	273.195	194.928	273.492	194.298
PtK_GFP-tub	211216_002_04a_MAX 18-20	261	260	260.628	260.791	260.257	261.582	259.885	262.374	259.514	263.165	259.143	263.957	258.772	264.748	258.402	265.54	258.031	266.332	257.661	267.123	257.292	267.916	256.923	268.708	256.554	269.5	256.186	270.293	255.818	271.086	255.451	271.879	255.085	272.672	254.719	273.466	254.354	274.26	253.99	275.054	253.627	275.849	253.264	276.644	252.903	277.439	252.542	278.235
PtK_GFP-tub	211216_002_04b_MAX 18-20	270	235	270.282	234.117	270.564	233.233	270.847	232.349	271.129	231.465	271.412	230.581	271.695	229.696	271.978	228.81	272.261	227.924	272.545	227.036	272.829	226.148	273.114	225.259	273.399	224.368	273.685	223.476	273.972	222.583	274.259	221.688	274.547	220.791	274.836	219.893	275.125	218.993	275.416	218.091	275.707	217.187	275.999	216.28	276.293	215.372	276.587	214.461
PtK_GFP-tub	211216_002_05a_MAX 15-20	276	266	275.594	266.896	275.188	267.792	274.783	268.688	274.377	269.584	273.97	270.479	273.564	271.374	273.157	272.268	272.75	273.161	272.342	274.053	271.934	274.945	271.526	275.835	271.117	276.724	270.707	277.613	270.297	278.499	269.886	279.384	269.474	280.268	269.062	281.15	268.648	282.03	268.234	282.908	267.818	283.785	267.402	284.659	266.985	285.531	266.566	286.401
PtK_GFP-tub	211216_002_05b_MAX 16-19	269	233	269.533	231.908	270.066	230.816	270.597	229.724	271.127	228.632	271.654	227.542	272.179	226.452	272.701	225.362	273.218	224.274	273.732	223.187	274.24	222.101	274.743	221.016	275.24	219.933	275.73	218.852	276.213	217.772	276.689	216.694	277.156	215.619	277.614	214.545	278.063	213.474	278.503	212.406	278.931	211.34	279.349	210.277	279.756	209.217	280.15	208.159
PtK_GFP-tub	211216_007_01a_MAX 13-19	266	233	265.377	232.164	264.754	231.328	264.131	230.492	263.508	229.657	262.884	228.822	262.259	227.988	261.634	227.154	261.007	226.321	260.38	225.489	259.752	224.658	259.122	223.828	258.491	222.999	257.858	222.172	257.224	221.346	256.588	220.522	255.95	219.699	255.31	218.878	254.668	218.06	254.024	217.243	253.377	216.428	252.728	215.615	252.076	214.805	251.422	213.998
PtK_GFP-tub	211216_007_01b_MAX 15-22	288	240	288.492	240.997	288.983	241.993	289.474	242.99	289.965	243.987	290.454	244.983	290.941	245.98	291.427	246.977	291.911	247.974	292.392	248.971	292.872	249.968	293.348	250.966	293.821	251.963	294.29	252.961	294.756	253.958	295.218	254.956	295.675	255.954	296.128	256.952	296.577	257.951	297.02	258.949	297.457	259.948	297.889	260.947	298.315	261.946	298.735	262.946
PtK_GFP-tub	211216_007_02a_MAX 10-15	236	225	235.618	224.489	235.237	223.979	234.855	223.468	234.474	222.958	234.092	222.447	233.711	221.937	233.33	221.427	232.95	220.918	232.57	220.408	232.19	219.899	231.81	219.391	231.431	218.883	231.053	218.375	230.675	217.868	230.297	217.362	229.921	216.856	229.544	216.35	229.169	215.846	228.794	215.342	228.421	214.839	228.047	214.336	227.675	213.834	227.304	213.334
PtK_GFP-tub	211216_007_02b_MAX 12-24	263	271	263.506	271.544	264.012	272.089	264.518	272.633	265.023	273.178	265.528	273.722	266.033	274.267	266.537	274.812	267.04	275.358	267.542	275.903	268.044	276.449	268.544	276.996	269.044	277.542	269.542	278.09	270.039	278.637	270.534	279.186	271.028	279.734	271.52	280.284	272.01	280.834	272.499	281.385	272.986	281.936	273.47	282.488	273.953	283.041	274.433	283.595
PtK_GFP-tub	211216_007_03a_MAX 13-18	227	278	226.528	276.959	226.055	275.917	225.583	274.876	225.112	273.835	224.642	272.795	224.172	271.754	223.704	270.714	223.237	269.674	222.771	268.635	222.307	267.596	221.845	266.558	221.385	265.521	220.928	264.484	220.473	263.448	220.02	262.413	219.57	261.379	219.124	260.346	218.68	259.313	218.24	258.282	217.804	257.252	217.371	256.223	216.943	255.196	216.518	254.169
PtK_GFP-tub	211216_007_03b_MAX 17-25	243	292	243.464	292.554	243.928	293.108	244.392	293.661	244.857	294.214	245.323	294.766	245.789	295.318	246.256	295.868	246.724	296.418	247.192	296.966	247.663	297.513	248.135	298.058	248.608	298.602	249.083	299.144	249.559	299.683	250.038	300.221	250.519	300.756	251.002	301.289	251.488	301.819	251.976	302.346	252.466	302.87	252.96	303.391	253.456	303.909	253.956	304.424
PtK_GFP-tub	211216_008_01a_MAX 20-30	265	241	264.271	240.793	263.541	240.588	262.811	240.383	262.08	240.18	261.348	239.98	260.615	239.783	259.88	239.59	259.144	239.401	258.406	239.217	257.666	239.039	256.923	238.867	256.177	238.703	255.429	238.546	254.677	238.397	253.922	238.257	253.163	238.127	252.401	238.006	251.634	237.897	250.863	237.799	250.087	237.713	249.307	237.64	248.521	237.58	247.73	237.534
PtK_GFP-tub	211216_008_01b_MAX 25-35	263	239	263.836	239.12	264.671	239.241	265.507	239.362	266.341	239.486	267.175	239.611	268.008	239.739	268.84	239.87	269.67	240.006	270.499	240.145	271.326	240.289	272.151	240.438	272.974	240.594	273.794	240.756	274.612	240.924	275.427	241.101	276.239	241.285	277.048	241.478	277.854	241.68	278.656	241.892	279.454	242.113	280.248	242.346	281.039	242.589	281.825	242.845
PtK_GFP-tub	211216_008_02a_MAX 18-28	252.75	274.25	252.004	273.99	251.258	273.73	250.512	273.47	249.767	273.21	249.021	272.95	248.276	272.69	247.531	272.431	246.786	272.172	246.042	271.913	245.298	271.655	244.555	271.397	243.812	271.14	243.069	270.882	242.327	270.626	241.586	270.37	240.845	270.115	240.105	269.86	239.366	269.606	238.628	269.352	237.89	269.1	237.154	268.848	236.418	268.597	235.683	268.347
PtK_GFP-tub	211216_008_02b_MAX 26-30	267	277	267.685	277.253	268.37	277.507	269.055	277.76	269.739	278.014	270.423	278.268	271.106	278.522	271.79	278.776	272.472	279.03	273.154	279.285	273.835	279.54	274.515	279.795	275.194	280.051	275.872	280.307	276.549	280.564	277.224	280.821	277.899	281.078	278.572	281.337	279.243	281.595	279.913	281.855	280.581	282.115	281.248	282.375	281.912	282.637	282.575	282.899
PtK_GFP-tub	211216_008_03a_MAX 22-25	243	300	242.341	299.61	241.683	299.22	241.025	298.829	240.367	298.439	239.709	298.049	239.052	297.658	238.396	297.267	237.74	296.876	237.085	296.485	236.431	296.093	235.778	295.702	235.126	295.309	234.476	294.917	233.826	294.524	233.178	294.13	232.532	293.737	231.887	293.342	231.244	292.947	230.602	292.552	229.963	292.156	229.325	291.76	228.69	291.362	228.056	290.964
PtK_GFP-tub	211216_008_03b_MAX 24-30	259	308	259.802	308.093	260.604	308.185	261.405	308.278	262.207	308.37	263.007	308.463	263.808	308.555	264.608	308.646	265.407	308.737	266.205	308.828	267.002	308.918	267.798	309.008	268.593	309.097	269.387	309.185	270.179	309.272	270.97	309.359	271.76	309.445	272.547	309.53	273.333	309.614	274.117	309.696	274.899	309.778	275.679	309.859	276.457	309.938	277.232	310.016
PtK_GFP-tub	211217_001_01a_MAX 14-22	232	258	231.113	258.583	230.227	259.166	229.344	259.751	228.466	260.338	227.594	260.927	226.731	261.52	225.876	262.116	225.033	262.718	224.203	263.324	223.387	263.937	222.586	264.556	221.803	265.182	221.039	265.816	220.296	266.459	219.575	267.111	218.877	267.772	218.205	268.445	217.56	269.128	216.941	269.822	216.346	270.523	215.773	271.229	215.218	271.938	214.678	272.647
PtK_GFP-tub	211217_001_01b_MAX 13-19	253.167	246.167	254.058	245.863	254.95	245.559	255.842	245.256	256.735	244.952	257.628	244.648	258.522	244.344	259.418	244.04	260.314	243.736	261.211	243.431	262.11	243.127	263.011	242.823	263.913	242.518	264.817	242.213	265.724	241.908	266.632	241.603	267.543	241.297	268.457	240.992	269.373	240.686	270.293	240.38	271.215	240.073	272.141	239.766	273.07	239.459	274.002	239.152
PtK_GFP-tub	211217_001_02a_MAX 13-22	234.5	270.167	233.822	270.491	233.145	270.816	232.467	271.142	231.789	271.468	231.11	271.795	230.431	272.124	229.752	272.454	229.071	272.787	228.39	273.121	227.708	273.458	227.024	273.798	226.34	274.14	225.654	274.486	224.967	274.835	224.279	275.188	223.589	275.546	222.897	275.907	222.204	276.274	221.508	276.645	220.811	277.021	220.111	277.402	219.41	277.79	218.706	278.183
PtK_GFP-tub	211217_001_02b_MAX 13-16	247.833	259.833	248.748	259.433	249.663	259.032	250.578	258.631	251.493	258.23	252.409	257.828	253.325	257.426	254.242	257.023	255.159	256.62	256.077	256.215	256.996	255.81	257.916	255.403	258.837	254.995	259.758	254.586	260.681	254.175	261.606	253.763	262.531	253.349	263.458	252.934	264.387	252.516	265.317	252.097	266.249	251.675	267.182	251.251	268.118	250.825	269.055	250.396
PtK_GFP-tub	211217_001_03a_MAX 12-22	250	277	249.358	277.497	248.716	277.994	248.073	278.491	247.429	278.988	246.785	279.485	246.139	279.981	245.492	280.478	244.843	280.974	244.191	281.471	243.538	281.967	242.882	282.462	242.223	282.958	241.56	283.453	240.895	283.948	240.226	284.443	239.553	284.937	238.876	285.431	238.195	285.925	237.509	286.418	236.818	286.91	236.122	287.403	235.421	287.894	234.714	288.386
PtK_GFP-tub	211217_001_03b_MAX 8-14	262.5	275.167	263.316	274.581	264.132	273.996	264.948	273.41	265.764	272.825	266.579	272.24	267.394	271.656	268.209	271.071	269.024	270.488	269.838	269.905	270.652	269.322	271.465	268.74	272.277	268.159	273.089	267.579	273.9	266.999	274.71	266.421	275.519	265.844	276.328	265.267	277.135	264.692	277.942	264.118	278.747	263.545	279.552	262.974	280.355	262.404	281.157	261.835
PtK_GFP-tub	211217_001_04a_MAX 11-19	273	292	272.243	292.551	271.484	293.102	270.725	293.652	269.964	294.202	269.201	294.752	268.434	295.301	267.664	295.849	266.89	296.397	266.111	296.943	265.327	297.488	264.537	298.032	263.74	298.575	262.937	299.116	262.125	299.655	261.305	300.193	260.477	300.728	259.638	301.262	258.79	301.794	257.931	302.323	257.061	302.849	256.179	303.374	255.284	303.895	254.377	304.414
PtK_GFP-tub	211217_001_04b_MAX 10-18	275	292	275.791	291.298	276.583	290.596	277.374	289.894	278.164	289.193	278.955	288.491	279.744	287.789	280.533	287.088	281.321	286.386	282.108	285.685	282.894	284.984	283.679	284.283	284.462	283.582	285.244	282.881	286.024	282.181	286.802	281.481	287.579	280.781	288.353	280.081	289.126	279.381	289.896	278.682	290.664	277.983	291.43	277.284	292.193	276.586	292.953	275.888
PtK_GFP-tub	211217_001_05a_MAX 19-24	273	306	272.154	306.619	271.307	307.238	270.458	307.856	269.608	308.472	268.755	309.087	267.899	309.699	267.038	310.309	266.174	310.915	265.304	311.518	264.428	312.117	263.546	312.712	262.656	313.301	261.758	313.885	260.852	314.463	259.937	315.035	259.012	315.6	258.077	316.157	257.13	316.707	256.172	317.249	255.201	317.783	254.217	318.307	253.219	318.822	252.207	319.327
PtK_GFP-tub	211217_001_05b_MAX 14-20	284.5	299.167	285.439	298.652	286.377	298.137	287.315	297.621	288.25	297.103	289.184	296.583	290.116	296.059	291.045	295.532	291.97	295	292.891	294.464	293.808	293.922	294.721	293.373	295.628	292.818	296.529	292.256	297.424	291.686	298.312	291.107	299.193	290.519	300.066	289.921	300.931	289.312	301.787	288.692	302.634	288.061	303.472	287.417	304.299	286.761	305.116	286.091
PtK_GFP-tub	211217_007_01a_MAX 14-16	223.75	235.5	223.477	236.027	223.203	236.555	222.93	237.083	222.657	237.611	222.384	238.14	222.112	238.67	221.839	239.2	221.568	239.732	221.296	240.265	221.025	240.8	220.755	241.336	220.485	241.874	220.216	242.414	219.948	242.956	219.68	243.501	219.413	244.048	219.148	244.597	218.883	245.149	218.619	245.704	218.356	246.262	218.094	246.824	217.833	247.388	217.574	247.957
PtK_GFP-tub	211217_007_01b_MAX 14-17	234.25	215.25	234.625	214.642	235.001	214.033	235.378	213.425	235.755	212.816	236.134	212.206	236.514	211.595	236.897	210.983	237.282	210.37	237.669	209.756	238.06	209.141	238.454	208.523	238.851	207.904	239.253	207.283	239.659	206.66	240.07	206.034	240.485	205.406	240.906	204.776	241.333	204.142	241.766	203.506	242.205	202.866	242.651	202.223	243.104	201.577	243.564	200.926
PtK_GFP-tub	211217_007_02a_MAX 15-18	248.25	242	247.745	242.552	247.241	243.104	246.736	243.656	246.232	244.208	245.727	244.762	245.222	245.315	244.718	245.87	244.214	246.425	243.71	246.981	243.206	247.538	242.702	248.097	242.198	248.657	241.695	249.219	241.191	249.782	240.688	250.347	240.185	250.913	239.683	251.482	239.18	252.053	238.678	252.626	238.176	253.202	237.674	253.78	237.173	254.36	236.672	254.943
PtK_GFP-tub	211217_007_02b_MAX 16-18	259.75	215.25	260.164	214.632	260.578	214.015	260.992	213.397	261.406	212.78	261.82	212.163	262.234	211.547	262.648	210.931	263.062	210.316	263.475	209.702	263.889	209.088	264.302	208.476	264.716	207.864	265.128	207.253	265.541	206.644	265.954	206.036	266.366	205.429	266.779	204.824	267.19	204.221	267.602	203.619	268.014	203.019	268.425	202.421	268.836	201.824	269.246	201.23
PtK_GFP-tub	211217_007_03a_MAX 15-18	246.333	263.5	246.042	263.815	245.75	264.13	245.458	264.445	245.165	264.76	244.872	265.076	244.578	265.392	244.284	265.709	243.988	266.027	243.691	266.346	243.393	266.666	243.094	266.987	242.793	267.31	242.49	267.634	242.186	267.959	241.879	268.286	241.571	268.615	241.26	268.945	240.946	269.278	240.631	269.613	240.312	269.95	239.991	270.289	239.667	270.631	239.339	270.976
PtK_GFP-tub	211217_007_03b_MAX 12-16	256.833	250.167	257.179	249.382	257.525	248.598	257.871	247.812	258.218	247.026	258.565	246.238	258.913	245.448	259.261	244.656	259.611	243.861	259.961	243.064	260.313	242.263	260.666	241.458	261.02	240.65	261.376	239.837	261.733	239.019	262.093	238.196	262.454	237.367	262.817	236.533	263.183	235.692	263.55	234.845	263.92	233.99	264.293	233.128	264.668	232.259	265.047	231.381
PtK_GFP-tub	211217_007_04a_MAX 19-23	260.25	255.5	259.848	255.939	259.446	256.379	259.043	256.819	258.64	257.26	258.234	257.703	257.827	258.147	257.418	258.594	257.006	259.042	256.591	259.494	256.173	259.948	255.751	260.406	255.325	260.868	254.895	261.334	254.46	261.804	254.02	262.279	253.575	262.76	253.124	263.245	252.666	263.737	252.202	264.234	251.731	264.738	251.253	265.249	250.767	265.767	250.273	266.293
PtK_GFP-tub	211217_007_04b_MAX 18-21	274	242.167	274.271	241.262	274.542	240.357	274.813	239.452	275.085	238.548	275.356	237.644	275.627	236.741	275.898	235.839	276.169	234.937	276.441	234.036	276.712	233.137	276.983	232.238	277.255	231.341	277.526	230.445	277.797	229.551	278.069	228.658	278.34	227.767	278.612	226.878	278.883	225.991	279.155	225.106	279.427	224.223	279.698	223.343	279.97	222.465	280.242	221.589
PtK_GFP-tub	211223_001_01a_MAX 15-22	182	279	182.328	279.725	182.657	280.45	182.985	281.175	183.314	281.899	183.644	282.623	183.974	283.345	184.305	284.067	184.637	284.788	184.97	285.508	185.304	286.226	185.639	286.943	185.976	287.658	186.314	288.371	186.655	289.082	186.996	289.792	187.34	290.498	187.686	291.203	188.034	291.905	188.385	292.604	188.738	293.3	189.093	293.993	189.451	294.683	189.812	295.37
PtK_GFP-tub	211223_001_01b_MAX 20-22	173.167	250.167	173.352	249.198	173.538	248.231	173.724	247.263	173.911	246.296	174.099	245.33	174.287	244.365	174.477	243.401	174.668	242.438	174.86	241.477	175.054	240.517	175.25	239.56	175.448	238.604	175.648	237.651	175.851	236.7	176.056	235.752	176.264	234.807	176.475	233.865	176.69	232.926	176.907	231.991	177.129	231.059	177.353	230.131	177.582	229.207	177.815	228.288
PtK_GFP-tub	211223_001_02a_MAX 8-15	192.25	260.5	192.533	261.484	192.815	262.469	193.098	263.453	193.381	264.437	193.663	265.421	193.946	266.405	194.228	267.389	194.511	268.372	194.794	269.355	195.076	270.338	195.359	271.321	195.641	272.304	195.924	273.286	196.206	274.267	196.488	275.249	196.771	276.23	197.053	277.21	197.335	278.19	197.618	279.17	197.9	280.149	198.182	281.127	198.464	282.105	198.746	283.082
PtK_GFP-tub	211223_001_02b_MAX 12-20	186.75	246.5	186.783	245.652	186.816	244.804	186.849	243.956	186.884	243.108	186.92	242.26	186.957	241.412	186.996	240.563	187.037	239.715	187.081	238.866	187.128	238.017	187.177	237.167	187.23	236.318	187.287	235.468	187.347	234.617	187.412	233.767	187.481	232.915	187.555	232.064	187.635	231.212	187.72	230.359	187.811	229.506	187.907	228.653	188.011	227.799	188.121	226.944
PtK_GFP-tub	211223_001_03a_MAX 10-15	209	251	209.079	251.794	209.158	252.588	209.237	253.382	209.316	254.176	209.397	254.97	209.477	255.765	209.558	256.559	209.641	257.354	209.724	258.149	209.808	258.944	209.893	259.74	209.98	260.536	210.068	261.332	210.158	262.128	210.249	262.925	210.342	263.723	210.437	264.521	210.534	265.319	210.633	266.118	210.735	266.917	210.839	267.717	210.945	268.518	211.054	269.319
PtK_GFP-tub	211223_001_03b_MAX 14-23	208.75	233.75	208.782	233.118	208.815	232.486	208.847	231.853	208.879	231.222	208.911	230.59	208.944	229.958	208.976	229.327	209.009	228.696	209.042	228.065	209.074	227.435	209.107	226.805	209.14	226.176	209.173	225.547	209.207	224.919	209.24	224.292	209.274	223.665	209.308	223.038	209.342	222.413	209.376	221.788	209.411	221.164	209.446	220.542	209.481	219.919	209.516	219.298
PtK_GFP-tub	211223_001_04a_MAX 15-21	226.75	263	226.816	263.556	226.882	264.111	226.948	264.667	227.014	265.224	227.08	265.781	227.146	266.338	227.212	266.896	227.277	267.455	227.343	268.015	227.407	268.576	227.472	269.138	227.536	269.701	227.601	270.266	227.664	270.832	227.727	271.401	227.79	271.97	227.853	272.542	227.915	273.115	227.976	273.691	228.037	274.269	228.098	274.849	228.157	275.432	228.217	276.017
PtK_GFP-tub	211223_001_04b_MAX 15-22	247.75	228.25	247.738	227.637	247.726	227.024	247.713	226.412	247.699	225.799	247.685	225.187	247.669	224.576	247.651	223.965	247.632	223.355	247.61	222.746	247.586	222.138	247.56	221.531	247.53	220.925	247.498	220.32	247.461	219.716	247.422	219.114	247.378	218.514	247.33	217.915	247.277	217.318	247.22	216.723	247.157	216.13	247.09	215.539	247.017	214.951	246.938	214.364
PtK_GFP-tub	211223_003_01a_MAX 8-14	213	309.5	213.513	309.952	214.027	310.403	214.541	310.855	215.055	311.306	215.57	311.756	216.085	312.207	216.601	312.656	217.118	313.105	217.636	313.553	218.154	314	218.674	314.447	219.195	314.892	219.718	315.336	220.242	315.778	220.767	316.22	221.295	316.659	221.824	317.098	222.355	317.534	222.888	317.969	223.424	318.402	223.961	318.832	224.501	319.261	225.044	319.688
PtK_GFP-tub	211223_003_01b_MAX 15-20	202	287.75	201.641	286.855	201.281	285.96	200.923	285.065	200.565	284.169	200.209	283.273	199.854	282.376	199.502	281.478	199.151	280.58	198.803	279.68	198.458	278.78	198.117	277.878	197.779	276.975	197.444	276.071	197.114	275.164	196.789	274.257	196.468	273.347	196.153	272.435	195.843	271.522	195.538	270.606	195.24	269.687	194.949	268.766	194.664	267.843	194.387	266.917
PtK_GFP-tub	211223_003_02a_MAX 8-15	225	305.5	225.325	305.832	225.651	306.165	225.976	306.497	226.302	306.83	226.628	307.162	226.954	307.494	227.281	307.827	227.609	308.159	227.937	308.491	228.266	308.823	228.595	309.155	228.926	309.487	229.257	309.819	229.59	310.151	229.923	310.483	230.258	310.815	230.594	311.146	230.932	311.478	231.27	311.809	231.611	312.14	231.953	312.472	232.296	312.803	232.642	313.134
PtK_GFP-tub	211223_003_02b_MAX 15-21	215.167	284.667	214.717	283.917	214.268	283.168	213.819	282.418	213.37	281.668	212.922	280.919	212.476	280.169	212.03	279.419	211.586	278.668	211.143	277.918	210.703	277.167	210.264	276.416	209.827	275.665	209.393	274.913	208.961	274.161	208.532	273.409	208.106	272.656	207.683	271.903	207.264	271.149	206.848	270.395	206.435	269.64	206.027	268.884	205.623	268.128	205.223	267.372
PtK_GFP-tub	211223_003_03a_MAX 19-23	246.833	296	247.145	296.454	247.456	296.908	247.768	297.362	248.079	297.815	248.389	298.269	248.7	298.723	249.009	299.176	249.319	299.629	249.627	300.082	249.935	300.535	250.242	300.987	250.548	301.439	250.852	301.891	251.156	302.343	251.459	302.794	251.76	303.245	252.06	303.695	252.359	304.145	252.656	304.594	252.952	305.043	253.245	305.491	253.537	305.939	253.827	306.387
PtK_GFP-tub	211223_003_03b_MAX 18-23	237	277	236.655	276.229	236.311	275.458	235.966	274.687	235.621	273.917	235.276	273.146	234.93	272.376	234.585	271.606	234.239	270.836	233.892	270.067	233.546	269.297	233.198	268.529	232.85	267.76	232.502	266.993	232.153	266.225	231.803	265.458	231.453	264.692	231.101	263.927	230.75	263.162	230.397	262.398	230.043	261.634	229.688	260.872	229.332	260.11	228.975	259.349
PtK_GFP-tub	211223_003_04a_MAX 1-6	250.75	272.5	251.03	273.057	251.31	273.614	251.59	274.172	251.87	274.73	252.151	275.29	252.431	275.852	252.712	276.415	252.992	276.981	253.273	277.548	253.554	278.119	253.834	278.693	254.116	279.27	254.397	279.851	254.679	280.436	254.96	281.025	255.243	281.619	255.525	282.217	255.807	282.821	256.09	283.431	256.374	284.046	256.657	284.667	256.941	285.295	257.225	285.93
PtK_GFP-tub	211223_003_04b_MAX 4-20	238	263	237.347	262.21	236.694	261.419	236.041	260.629	235.389	259.84	234.738	259.051	234.088	258.262	233.438	257.475	232.79	256.689	232.143	255.903	231.498	255.119	230.854	254.337	230.212	253.556	229.573	252.776	228.935	251.999	228.3	251.223	227.668	250.45	227.038	249.679	226.411	248.91	225.788	248.144	225.167	247.381	224.55	246.62	223.937	245.862	223.327	245.108
PtK_GFP-tub	211223_003_05a_MAX 11-18	261.833	261.333	262.102	262.072	262.371	262.81	262.639	263.549	262.906	264.289	263.172	265.03	263.436	265.773	263.699	266.517	263.959	267.264	264.217	268.013	264.472	268.764	264.724	269.519	264.973	270.277	265.218	271.038	265.459	271.803	265.696	272.573	265.928	273.346	266.155	274.125	266.377	274.909	266.594	275.697	266.805	276.492	267.009	277.293	267.207	278.099	267.399	278.912
PtK_GFP-tub	211223_003_05b_MAX 12-19	260	242	259.42	241.528	258.839	241.056	258.259	240.583	257.677	240.11	257.095	239.637	256.511	239.163	255.927	238.689	255.341	238.214	254.753	237.738	254.163	237.261	253.571	236.783	252.977	236.304	252.381	235.823	251.781	235.341	251.179	234.858	250.574	234.373	249.965	233.887	249.353	233.398	248.737	232.908	248.117	232.416	247.492	231.921	246.864	231.425	246.23	230.926
PtK_GFP-tub	211223_005_01a_MAX 28-32	299.25	299	299.335	299.529	299.42	300.057	299.505	300.586	299.59	301.114	299.675	301.643	299.761	302.171	299.846	302.699	299.932	303.227	300.017	303.754	300.103	304.282	300.19	304.809	300.276	305.336	300.363	305.862	300.45	306.388	300.537	306.914	300.625	307.439	300.713	307.964	300.802	308.488	300.891	309.012	300.98	309.536	301.07	310.058	301.16	310.58	301.251	311.102
PtK_GFP-tub	211223_005_01b_MAX 29-31	287.167	264	286.976	263.138	286.786	262.277	286.596	261.415	286.406	260.553	286.216	259.692	286.026	258.83	285.836	257.968	285.647	257.107	285.457	256.245	285.268	255.384	285.079	254.522	284.89	253.661	284.701	252.799	284.513	251.938	284.325	251.077	284.137	250.215	283.95	249.354	283.762	248.493	283.576	247.631	283.389	246.77	283.203	245.909	283.018	245.048	282.833	244.187
PtK_GFP-tub	211223_005_02a_MAX 30-33	307.333	273.833	307.549	274.654	307.765	275.475	307.981	276.296	308.196	277.116	308.411	277.936	308.626	278.755	308.84	279.573	309.053	280.39	309.266	281.206	309.477	282.021	309.688	282.834	309.898	283.646	310.106	284.456	310.313	285.264	310.519	286.07	310.724	286.875	310.927	287.676	311.128	288.476	311.327	289.273	311.525	290.067	311.721	290.858	311.915	291.647	312.106	292.432
PtK_GFP-tub	211223_005_02b_MAX 28-33	293.5	245.5	293.289	244.895	293.079	244.289	292.868	243.684	292.658	243.079	292.447	242.474	292.237	241.869	292.027	241.264	291.817	240.659	291.607	240.055	291.398	239.45	291.188	238.846	290.979	238.243	290.771	237.639	290.562	237.036	290.354	236.433	290.146	235.83	289.939	235.228	289.731	234.626	289.525	234.025	289.318	233.424	289.113	232.824	288.908	232.224	288.703	231.625
PtK_GFP-tub	211223_007_01a_MAX 14-18	246.167	260.5	245.668	261.316	245.17	262.132	244.671	262.95	244.173	263.768	243.675	264.589	243.176	265.412	242.678	266.237	242.18	267.066	241.683	267.898	241.185	268.735	240.688	269.576	240.19	270.422	239.693	271.274	239.197	272.132	238.7	272.996	238.204	273.866	237.708	274.745	237.213	275.631	236.718	276.525	236.223	277.428	235.728	278.34	235.234	279.262	234.741	280.194
PtK_GFP-tub	211223_007_01b_MAX 14-16	274.75	242.75	275.845	242.187	276.939	241.624	278.034	241.061	279.129	240.499	280.224	239.937	281.319	239.377	282.414	238.818	283.51	238.26	284.606	237.704	285.702	237.149	286.798	236.597	287.895	236.046	288.993	235.498	290.09	234.953	291.188	234.41	292.287	233.87	293.386	233.333	294.486	232.8	295.586	232.27	296.687	231.744	297.789	231.222	298.891	230.703	299.994	230.19
PtK_GFP-tub	211223_007_02a_MAX 14-18	260.75	272.75	259.943	273.544	259.136	274.338	258.329	275.132	257.523	275.928	256.718	276.724	255.914	277.522	255.112	278.321	254.31	279.122	253.511	279.924	252.713	280.729	251.917	281.537	251.124	282.348	250.334	283.161	249.546	283.978	248.761	284.798	247.979	285.622	247.201	286.45	246.426	287.283	245.655	288.12	244.889	288.961	244.126	289.808	243.368	290.66	242.615	291.518
PtK_GFP-tub	211223_007_02b_MAX 13-16	275.5	258	276.523	257.29	277.546	256.58	278.569	255.87	279.592	255.161	280.616	254.453	281.64	253.745	282.665	253.039	283.691	252.334	284.717	251.63	285.744	250.928	286.773	250.227	287.802	249.529	288.833	248.832	289.864	248.138	290.898	247.446	291.933	246.757	292.969	246.071	294.007	245.388	295.047	244.708	296.089	244.031	297.132	243.357	298.178	242.688	299.226	242.022
PtK_GFP-tub	211223_007_03a_MAX 17-20	285.167	287.667	284.104	288.406	283.042	289.146	281.98	289.885	280.92	290.625	279.861	291.365	278.803	292.104	277.747	292.844	276.693	293.583	275.642	294.323	274.594	295.062	273.55	295.801	272.508	296.541	271.471	297.28	270.438	298.019	269.409	298.758	268.385	299.497	267.366	300.236	266.353	300.975	265.345	301.714	264.344	302.453	263.349	303.192	262.361	303.93	261.38	304.669
PtK_GFP-tub	211223_007_03b_MAX 14-19	298	279.25	298.857	278.48	299.713	277.709	300.57	276.939	301.426	276.17	302.283	275.4	303.139	274.631	303.994	273.862	304.849	273.094	305.704	272.327	306.559	271.561	307.413	270.795	308.266	270.03	309.119	269.266	309.971	268.504	310.823	267.742	311.674	266.982	312.524	266.223	313.373	265.466	314.221	264.71	315.068	263.956	315.915	263.203	316.76	262.452	317.604	261.703
PtK_GFP-tub	211223_007_04a_MAX 14-16	293	304.5	292.019	305.239	291.038	305.978	290.057	306.717	289.076	307.455	288.095	308.193	287.115	308.93	286.136	309.666	285.158	310.401	284.18	311.134	283.203	311.866	282.227	312.597	281.252	313.327	280.278	314.054	279.305	314.779	278.334	315.503	277.364	316.224	276.396	316.943	275.429	317.659	274.464	318.372	273.501	319.083	272.54	319.79	271.58	320.495	270.623	321.196
PtK_GFP-tub	211223_007_04b_MAX 14-20	306.75	291.5	307.612	290.633	308.473	289.766	309.334	288.899	310.196	288.032	311.057	287.165	311.917	286.299	312.777	285.433	313.637	284.568	314.496	283.703	315.355	282.839	316.213	281.975	317.07	281.112	317.926	280.25	318.782	279.388	319.636	278.528	320.49	277.668	321.342	276.81	322.193	275.952	323.043	275.096	323.892	274.241	324.74	273.387	325.585	272.535	326.43	271.684
PtK_GFP-tub	211223_007_05a_MAX 14-18	310.75	311.75	309.774	312.234	308.798	312.717	307.822	313.202	306.845	313.686	305.868	314.171	304.891	314.657	303.914	315.143	302.936	315.63	301.957	316.119	300.977	316.608	299.997	317.099	299.016	317.591	298.034	318.085	297.051	318.581	296.067	319.079	295.082	319.578	294.096	320.08	293.108	320.583	292.119	321.089	291.128	321.598	290.136	322.11	289.143	322.623	288.147	323.14
PtK_GFP-tub	211223_007_05b_MAX 14-19	324.833	298.5	325.495	297.646	326.156	296.793	326.818	295.939	327.48	295.085	328.141	294.23	328.803	293.375	329.466	292.52	330.128	291.664	330.791	290.807	331.455	289.949	332.118	289.091	332.783	288.231	333.447	287.371	334.113	286.509	334.779	285.646	335.445	284.782	336.112	283.916	336.78	283.049	337.449	282.181	338.118	281.31	338.788	280.438	339.459	279.564	340.131	278.688
PtK_GFP-tub	211223_009_01a_MAX 17-20	235.5	228	234.894	228.796	234.289	229.593	233.684	230.389	233.079	231.186	232.475	231.982	231.873	232.779	231.271	233.575	230.671	234.372	230.072	235.168	229.475	235.965	228.88	236.762	228.287	237.559	227.696	238.356	227.108	239.153	226.523	239.95	225.94	240.747	225.361	241.544	224.785	242.342	224.212	243.14	223.643	243.937	223.078	244.735	222.517	245.533	221.96	246.332
PtK_GFP-tub	211223_009_01b_MAX 17-22	236.5	214	237.276	213.445	238.053	212.89	238.829	212.336	239.606	211.782	240.381	211.228	241.157	210.675	241.933	210.124	242.708	209.572	243.483	209.022	244.257	208.474	245.031	207.926	245.805	207.38	246.578	206.836	247.35	206.293	248.122	205.753	248.893	205.214	249.663	204.678	250.432	204.144	251.201	203.612	251.969	203.083	252.736	202.557	253.502	202.033	254.267	201.513
PtK_GFP-tub	211223_009_02a_MAX 19-22	232.5	233	231.926	233.771	231.352	234.542	230.778	235.314	230.205	236.086	229.632	236.859	229.06	237.632	228.489	238.406	227.919	239.18	227.35	239.956	226.782	240.733	226.216	241.512	225.651	242.291	225.088	243.072	224.527	243.855	223.968	244.64	223.411	245.427	222.856	246.215	222.304	247.006	221.754	247.8	221.206	248.595	220.662	249.393	220.121	250.194	219.583	250.998
PtK_GFP-tub	211223_009_02b_MAX 21-27	241.5	235.167	242.142	234.403	242.785	233.639	243.427	232.876	244.07	232.113	244.713	231.351	245.357	230.589	246.001	229.828	246.645	229.068	247.291	228.309	247.937	227.551	248.584	226.794	249.232	226.039	249.881	225.285	250.531	224.533	251.183	223.782	251.836	223.034	252.49	222.288	253.146	221.544	253.803	220.802	254.462	220.062	255.123	219.326	255.785	218.591	256.45	217.86
PtK_GFP-tub	211223_009_03a_MAX 16-22	251.667	240.667	251.175	241.367	250.684	242.068	250.192	242.769	249.7	243.47	249.206	244.172	248.712	244.874	248.217	245.577	247.721	246.28	247.223	246.984	246.724	247.689	246.223	248.394	245.72	249.101	245.215	249.809	244.708	250.518	244.198	251.229	243.685	251.94	243.17	252.654	242.652	253.369	242.131	254.085	241.606	254.803	241.077	255.524	240.546	256.246	240.01	256.97
PtK_GFP-tub	211223_009_03b_MAX 17-22	267.833	240.5	268.531	239.824	269.228	239.147	269.925	238.471	270.62	237.794	271.314	237.118	272.007	236.442	272.698	235.766	273.386	235.09	274.072	234.414	274.754	233.738	275.434	233.062	276.11	232.387	276.781	231.711	277.449	231.036	278.112	230.361	278.77	229.686	279.423	229.011	280.07	228.337	280.711	227.663	281.346	226.989	281.974	226.315	282.596	225.642	283.21	224.969
PtK_GFP-tub	211223_009_04a_MAX 15-17	255.333	256.333	254.698	256.694	254.062	257.055	253.427	257.416	252.792	257.779	252.157	258.143	251.523	258.508	250.89	258.875	250.257	259.245	249.625	259.618	248.994	259.993	248.364	260.372	247.735	260.754	247.107	261.14	246.481	261.53	245.856	261.925	245.233	262.325	244.611	262.731	243.991	263.141	243.373	263.558	242.757	263.981	242.142	264.411	241.53	264.847	240.92	265.291
PtK_GFP-tub	211223_009_04b_MAX 15-20	267.167	242.667	267.881	241.913	268.595	241.159	269.309	240.406	270.022	239.653	270.735	238.9	271.447	238.148	272.158	237.396	272.868	236.645	273.577	235.895	274.284	235.146	274.99	234.398	275.694	233.651	276.396	232.905	277.096	232.161	277.793	231.418	278.489	230.676	279.182	229.936	279.872	229.198	280.56	228.462	281.244	227.727	281.925	226.995	282.604	226.264	283.278	225.536
PtK_GFP-tub	211223_009_05a_MAX 16-22	275.75	266	274.929	266.671	274.108	267.342	273.287	268.012	272.466	268.682	271.645	269.351	270.823	270.02	270	270.688	269.177	271.354	268.353	272.02	267.529	272.684	266.703	273.347	265.877	274.008	265.05	274.668	264.221	275.325	263.391	275.981	262.56	276.634	261.728	277.285	260.894	277.933	260.059	278.579	259.222	279.222	258.384	279.863	257.544	280.5	256.701	281.133
PtK_GFP-tub	211223_009_05b_MAX 16-23	289.5	253	289.912	252.242	290.324	251.485	290.736	250.727	291.148	249.969	291.558	249.212	291.968	248.454	292.377	247.696	292.785	246.938	293.191	246.18	293.596	245.422	294	244.664	294.401	243.906	294.801	243.148	295.199	242.389	295.594	241.631	295.987	240.872	296.377	240.113	296.764	239.355	297.149	238.595	297.531	237.836	297.909	237.077	298.284	236.317	298.655	235.558
PtK_GFP-tub_mCh-p50	180817_019_02a_MAX30-34	422.5	458.167	421.871	459.358	421.241	460.549	420.613	461.74	419.984	462.932	419.356	464.124	418.728	465.317	418.102	466.51	417.476	467.704	416.851	468.899	416.227	470.094	415.604	471.291	414.982	472.489	414.362	473.688	413.744	474.889	413.127	476.091	412.512	477.295	411.898	478.5	411.287	479.707	410.678	480.916	410.071	482.127	409.466	483.34	408.864	484.555	408.265	485.772
PtK_GFP-tub_mCh-p50	180817_019_02b_MAX32-34	452.833	426.833	453.802	425.546	454.77	424.259	455.74	422.972	456.713	421.685	457.687	420.4	458.665	419.116	459.646	417.833	460.632	416.551	461.623	415.272	462.62	413.994	463.623	412.718	464.633	411.445	465.65	410.174	466.676	408.906	467.711	407.642	468.755	406.38	469.809	405.122	470.874	403.868	471.95	402.617	473.038	401.37	474.139	400.128	475.253	398.891	476.381	397.658
PtK_GFP-tub_mCh-p50	180817_019_03a_MAX21-27	416	493.5	415.625	494.673	415.25	495.846	414.875	497.019	414.501	498.191	414.127	499.362	413.753	500.532	413.379	501.701	413.006	502.868	412.634	504.034	412.262	505.197	411.89	506.359	411.519	507.518	411.15	508.675	410.781	509.829	410.413	510.981	410.046	512.129	409.68	513.274	409.315	514.415	408.951	515.552	408.588	516.686	408.227	517.815	407.867	518.94	407.509	520.061
PtK_GFP-tub_mCh-p50	180817_019_03b_MAX23-32	437.5	464.75	438.579	463.648	439.658	462.547	440.736	461.446	441.814	460.345	442.891	459.245	443.967	458.146	445.042	457.048	446.116	455.951	447.188	454.855	448.259	453.76	449.328	452.667	450.395	451.576	451.459	450.487	452.522	449.4	453.581	448.315	454.638	447.232	455.692	446.151	456.743	445.074	457.791	443.999	458.835	442.927	459.876	441.859	460.913	440.793	461.945	439.732
PtK_GFP-tub_mCh-p50	180817_019_04a_MAX29-34	437.167	520.833	436.864	521.54	436.561	522.247	436.258	522.955	435.954	523.662	435.651	524.369	435.349	525.076	435.045	525.783	434.742	526.49	434.439	527.197	434.136	527.904	433.833	528.611	433.53	529.318	433.227	530.025	432.924	530.732	432.621	531.439	432.318	532.146	432.015	532.854	431.712	533.561	431.409	534.268	431.106	534.975	430.803	535.682	430.5	536.389	430.197	537.096
PtK_GFP-tub_mCh-p50	180817_019_04b_MAX29-34	452	497.25	452.926	495.893	453.852	494.536	454.778	493.178	455.704	491.821	456.63	490.464	457.555	489.107	458.481	487.75	459.406	486.393	460.33	485.036	461.255	483.679	462.179	482.322	463.102	480.966	464.025	479.609	464.948	478.253	465.87	476.897	466.792	475.541	467.712	474.185	468.633	472.83	469.552	471.474	470.471	470.119	471.389	468.764	472.307	467.41	473.223	466.055
PtK_GFP-tub_mCh-p50	180817_019_05a_MAX16-22	509.5	557.5	508.977	558.977	508.454	560.455	507.931	561.934	507.407	563.415	506.882	564.897	506.355	566.383	505.826	567.871	505.296	569.363	504.763	570.859	504.228	572.359	503.69	573.865	503.149	575.376	502.605	576.894	502.057	578.418	501.505	579.95	500.949	581.489	500.388	583.037	499.823	584.593	499.252	586.159	498.676	587.734	498.095	589.32	497.508	590.916	496.915	592.524
PtK_GFP-tub_mCh-p50	180817_019_05b_MAX13-22	522.5	531.25	522.892	529.715	523.285	528.18	523.678	526.644	524.072	525.108	524.467	523.571	524.864	522.033	525.262	520.493	525.661	518.953	526.063	517.41	526.468	515.866	526.875	514.319	527.284	512.771	527.697	511.219	528.114	509.665	528.534	508.108	528.957	506.548	529.386	504.985	529.818	503.418	530.256	501.848	530.698	500.273	531.146	498.695	531.599	497.111	532.058	495.524
PtK_GFP-tub_mCh-p50	180817_019_06a_MAX15-19	521.75	570.25	521.037	572.008	520.324	573.767	519.61	575.526	518.897	577.286	518.184	579.047	517.47	580.809	516.757	582.572	516.043	584.338	515.329	586.106	514.615	587.876	513.901	589.649	513.186	591.424	512.471	593.203	511.756	594.985	511.041	596.771	510.325	598.561	509.61	600.355	508.893	602.153	508.176	603.956	507.459	605.764	506.742	607.577	506.024	609.396	505.306	611.221
PtK_GFP-tub_mCh-p50	180817_019_06b_MAX13-18	539.5	522.167	540.044	520.376	540.588	518.586	541.133	516.796	541.677	515.007	542.221	513.217	542.764	511.428	543.308	509.639	543.852	507.851	544.395	506.063	544.938	504.276	545.482	502.489	546.024	500.703	546.567	498.918	547.109	497.133	547.651	495.35	548.193	493.567	548.734	491.786	549.275	490.005	549.816	488.226	550.356	486.448	550.896	484.671	551.436	482.896	551.975	481.122
PtK_GFP-tub_mCh-p50	180903_006_01a_MAX18-24	372	504	371.283	504.695	370.565	505.39	369.848	506.086	369.131	506.782	368.415	507.478	367.698	508.174	366.983	508.871	366.267	509.569	365.553	510.267	364.839	510.966	364.125	511.666	363.413	512.366	362.701	513.068	361.991	513.771	361.281	514.475	360.573	515.181	359.866	515.887	359.16	516.596	358.455	517.305	357.752	518.016	357.05	518.729	356.351	519.444	355.652	520.161
PtK_GFP-tub_mCh-p50	180903_006_01b_MAX14-19	402.5	476.5	403.49	475.7	404.479	474.9	405.469	474.101	406.459	473.301	407.449	472.501	408.44	471.701	409.43	470.902	410.421	470.102	411.412	469.303	412.404	468.503	413.396	467.704	414.389	466.905	415.382	466.106	416.376	465.308	417.37	464.509	418.365	463.711	419.361	462.913	420.357	462.115	421.355	461.317	422.353	460.52	423.352	459.722	424.352	458.925	425.353	458.129
PtK_GFP-tub_mCh-p50	180903_006_02a_MAX29-34	403.833	555.167	403.038	556.47	402.242	557.773	401.447	559.076	400.652	560.378	399.857	561.68	399.063	562.981	398.269	564.282	397.476	565.581	396.684	566.88	395.892	568.177	395.101	569.473	394.312	570.767	393.523	572.06	392.735	573.351	391.949	574.64	391.164	575.927	390.38	577.212	389.598	578.495	388.818	579.776	388.039	581.053	387.262	582.329	386.486	583.601	385.713	584.87
PtK_GFP-tub_mCh-p50	180903_006_02b_MAX15-28	422.5	528.833	423.239	527.842	423.977	526.851	424.717	525.859	425.457	524.867	426.197	523.874	426.939	522.881	427.682	521.887	428.426	520.892	429.172	519.896	429.92	518.899	430.67	517.901	431.422	516.902	432.177	515.9	432.934	514.898	433.694	513.893	434.457	512.886	435.224	511.878	435.994	510.867	436.767	509.854	437.545	508.839	438.327	507.821	439.112	506.8	439.903	505.777
PtK_GFP-tub_mCh-p50	180903_006_05a_MAX18-25	470.333	627	470.024	627.741	469.714	628.482	469.404	629.224	469.096	629.965	468.787	630.707	468.48	631.448	468.173	632.19	467.868	632.932	467.564	633.674	467.261	634.416	466.96	635.159	466.66	635.901	466.363	636.644	466.067	637.388	465.774	638.132	465.483	638.876	465.194	639.62	464.908	640.365	464.625	641.111	464.345	641.856	464.068	642.603	463.795	643.35	463.524	644.097
PtK_GFP-tub_mCh-p50	180903_006_05b_MAX13-18	485.833	580.5	486.776	578.519	487.718	576.538	488.659	574.558	489.601	572.578	490.542	570.6	491.483	568.622	492.424	566.645	493.363	564.67	494.302	562.697	495.24	560.725	496.178	558.756	497.114	556.789	498.05	554.824	498.984	552.862	499.917	550.903	500.849	548.947	501.779	546.995	502.708	545.046	503.635	543.101	504.561	541.16	505.485	539.223	506.407	537.29	507.327	535.362
PtK_GFP-tub_mCh-p50	180903_006_06a_MAX22-30	520.5	589.75	519.913	590.71	519.325	591.67	518.739	592.632	518.152	593.594	517.567	594.559	516.983	595.525	516.4	596.494	515.819	597.466	515.239	598.442	514.662	599.422	514.086	600.405	513.513	601.394	512.943	602.388	512.375	603.387	511.81	604.393	511.249	605.404	510.691	606.423	510.137	607.45	509.587	608.484	509.041	609.526	508.5	610.577	507.962	611.637	507.43	612.706
PtK_GFP-tub_mCh-p50	180903_006_06b_MAX15-22	526.5	554.75	526.789	553.46	527.079	552.17	527.369	550.877	527.66	549.583	527.952	548.285	528.246	546.983	528.541	545.677	528.837	544.364	529.136	543.046	529.437	541.72	529.74	540.386	530.047	539.044	530.356	537.692	530.669	536.329	530.985	534.956	531.305	533.57	531.63	532.171	531.958	530.76	532.291	529.333	532.629	527.891	532.972	526.434	533.321	524.96	533.675	523.468
PtK_GFP-tub_mCh-p50	180903_007_01a_MAX31-38	486	461	485.442	461.059	484.884	461.119	484.326	461.178	483.769	461.238	483.211	461.298	482.654	461.359	482.098	461.42	481.542	461.481	480.986	461.543	480.432	461.606	479.878	461.669	479.324	461.733	478.772	461.798	478.221	461.864	477.67	461.931	477.121	461.999	476.573	462.068	476.026	462.138	475.48	462.21	474.936	462.283	474.393	462.357	473.852	462.433	473.312	462.511
PtK_GFP-tub_mCh-p50	180903_007_01b_MAX29-31	523.167	455.167	524.366	454.601	525.567	454.035	526.767	453.469	527.968	452.904	529.169	452.339	530.371	451.775	531.575	451.212	532.779	450.65	533.985	450.089	535.192	449.529	536.401	448.971	537.611	448.414	538.824	447.859	540.039	447.305	541.256	446.754	542.475	446.205	543.697	445.658	544.922	445.113	546.15	444.571	547.381	444.031	548.615	443.495	549.853	442.961	551.094	442.43
PtK_GFP-tub_mCh-p50	180903_007_02a_MAX29-43	502	505	500.261	505.026	498.521	505.053	496.781	505.082	495.041	505.113	493.301	505.147	491.56	505.186	489.818	505.23	488.076	505.28	486.334	505.337	484.59	505.401	482.845	505.474	481.099	505.556	479.353	505.649	477.604	505.753	475.855	505.868	474.104	505.997	472.352	506.138	470.598	506.295	468.842	506.467	467.085	506.655	465.325	506.86	463.564	507.083	461.801	507.324
PtK_GFP-tub_mCh-p50	180903_007_02b_MAX21-28	539	498	540.986	498.464	542.972	498.927	544.957	499.389	546.941	499.849	548.924	500.308	550.905	500.765	552.884	501.219	554.862	501.669	556.837	502.116	558.808	502.558	560.778	502.996	562.743	503.428	564.705	503.855	566.663	504.276	568.616	504.69	570.565	505.098	572.509	505.497	574.448	505.889	576.381	506.272	578.308	506.646	580.229	507.011	582.144	507.366	584.051	507.711
PtK_GFP-tub_mCh-p50	180903_007_03a_MAX35-39	516	543	514.795	543.048	513.59	543.097	512.385	543.145	511.181	543.194	509.977	543.244	508.773	543.295	507.57	543.346	506.368	543.399	505.166	543.452	503.965	543.508	502.765	543.564	501.566	543.623	500.368	543.683	499.172	543.745	497.976	543.81	496.782	543.876	495.59	543.946	494.399	544.018	493.209	544.092	492.021	544.17	490.835	544.25	489.651	544.334	488.469	544.422
PtK_GFP-tub_mCh-p50	180903_007_03b_MAX24-35	551.5	542.5	553.004	542.156	554.509	541.812	556.015	541.47	557.522	541.129	559.033	540.791	560.546	540.455	562.063	540.123	563.584	539.795	565.11	539.471	566.642	539.152	568.18	538.839	569.724	538.532	571.277	538.232	572.836	537.94	574.405	537.655	575.983	537.379	577.571	537.112	579.169	536.854	580.778	536.607	582.399	536.37	584.032	536.145	585.678	535.931	587.337	535.73
PtK_GFP-tub_mCh-p50	180903_007_04a_MAX18-32	475.5	579.5	474.596	579.318	473.691	579.138	472.787	578.958	471.883	578.781	470.979	578.607	470.075	578.437	469.172	578.27	468.269	578.11	467.366	577.955	466.464	577.807	465.563	577.666	464.661	577.533	463.761	577.409	462.861	577.295	461.962	577.191	461.063	577.099	460.166	577.018	459.269	576.95	458.373	576.895	457.478	576.854	456.584	576.828	455.691	576.817	454.8	576.823
PtK_GFP-tub_mCh-p50	180903_007_04b_MAX12-18	518	577	519.744	576.977	521.489	576.954	523.235	576.93	524.981	576.905	526.73	576.88	528.481	576.852	530.234	576.824	531.99	576.793	533.75	576.76	535.513	576.724	537.281	576.686	539.054	576.644	540.831	576.6	542.615	576.551	544.404	576.499	546.199	576.442	548.002	576.381	549.812	576.315	551.629	576.244	553.455	576.168	555.289	576.086	557.132	575.998	558.984	575.904
PtK_GFP-tub_mCh-p50	180903_007_05a_MAX26-40	508.5	619	506.998	619.177	505.496	619.353	503.995	619.53	502.494	619.706	500.994	619.881	499.495	620.057	497.997	620.231	496.5	620.405	495.004	620.578	493.51	620.751	492.018	620.922	490.527	621.092	489.039	621.261	487.554	621.429	486.07	621.595	484.589	621.76	483.112	621.923	481.637	622.085	480.165	622.245	478.697	622.402	477.232	622.558	475.771	622.712	474.313	622.864
PtK_GFP-tub_mCh-p50	180903_007_05b_MAX17-26	543	618	544.163	617.928	545.328	617.855	546.494	617.781	547.664	617.704	548.837	617.624	550.016	617.54	551.202	617.451	552.394	617.356	553.595	617.255	554.806	617.147	556.027	617.031	557.259	616.906	558.504	616.771	559.762	616.626	561.035	616.47	562.324	616.301	563.63	616.12	564.953	615.925	566.295	615.715	567.658	615.49	569.041	615.249	570.446	614.991	571.874	614.716
PtK_GFP-tub_mCh-p50	180903_007_06a_MAX30-35	526.167	672.833	525.297	672.848	524.427	672.862	523.557	672.877	522.687	672.892	521.818	672.906	520.949	672.921	520.08	672.936	519.212	672.951	518.344	672.966	517.476	672.981	516.609	672.996	515.743	673.011	514.878	673.026	514.013	673.042	513.149	673.057	512.286	673.073	511.423	673.089	510.562	673.105	509.702	673.121	508.842	673.138	507.984	673.154	507.127	673.171	506.272	673.188
PtK_GFP-tub_mCh-p50	180903_007_06b_MAX31-38	560.167	675.167	561.187	675.323	562.206	675.479	563.225	675.635	564.243	675.791	565.259	675.946	566.273	676.1	567.285	676.254	568.295	676.407	569.302	676.559	570.305	676.71	571.304	676.86	572.299	677.008	573.29	677.155	574.276	677.301	575.257	677.444	576.232	677.586	577.201	677.727	578.164	677.865	579.12	678.001	580.069	678.134	581.01	678.266	581.944	678.394	582.87	678.521
PtK_GFP-tub_mCh-p50	180903_007_07a_MAX10-15	509	666.5	508.192	666.443	507.383	666.386	506.575	666.33	505.767	666.273	504.959	666.216	504.152	666.159	503.346	666.102	502.54	666.045	501.735	665.988	500.931	665.931	500.128	665.873	499.326	665.816	498.525	665.758	497.726	665.701	496.928	665.643	496.131	665.585	495.336	665.527	494.542	665.468	493.751	665.409	492.961	665.351	492.173	665.292	491.388	665.233	490.604	665.173
PtK_GFP-tub_mCh-p50	180903_007_07b_MAX9-14	537.5	669.25	538.244	669.389	538.988	669.528	539.731	669.667	540.475	669.806	541.217	669.944	541.96	670.083	542.701	670.221	543.442	670.358	544.181	670.495	544.919	670.632	545.656	670.768	546.392	670.903	547.126	671.038	547.859	671.171	548.59	671.305	549.318	671.437	550.045	671.568	550.77	671.698	551.492	671.828	552.213	671.956	552.93	672.083	553.645	672.209	554.357	672.333
PtK_GFP-tub_mCh-p50	180903_018_01a_MAX16-22	385.5	534.333	385.028	534.682	384.557	535.032	384.086	535.381	383.614	535.73	383.144	536.078	382.673	536.427	382.203	536.776	381.734	537.124	381.266	537.472	380.798	537.82	380.331	538.168	379.865	538.515	379.4	538.862	378.936	539.209	378.474	539.555	378.012	539.901	377.553	540.247	377.094	540.592	376.637	540.936	376.182	541.28	375.728	541.624	375.277	541.967	374.827	542.309
PtK_GFP-tub_mCh-p50	180903_018_01b_MAX8-15	406.833	517.167	407.956	516.357	409.079	515.547	410.202	514.737	411.325	513.928	412.448	513.118	413.571	512.309	414.694	511.501	415.817	510.693	416.941	509.885	418.064	509.078	419.188	508.272	420.311	507.466	421.435	506.661	422.559	505.857	423.683	505.054	424.808	504.251	425.932	503.45	427.057	502.65	428.182	501.851	429.307	501.053	430.432	500.257	431.558	499.462	432.684	498.668
PtK_GFP-tub_mCh-p50	180903_018_02a_MAX16-29	409.25	570.5	408.549	570.879	407.848	571.258	407.146	571.638	406.444	572.019	405.741	572.401	405.037	572.784	404.332	573.169	403.627	573.556	402.92	573.946	402.211	574.338	401.501	574.733	400.789	575.131	400.075	575.533	399.359	575.939	398.64	576.349	397.919	576.763	397.196	577.182	396.469	577.605	395.74	578.034	395.008	578.469	394.272	578.909	393.533	579.356	392.79	579.809
PtK_GFP-tub_mCh-p50	180903_018_02b_MAX6-13	422.5	555.5	423.313	554.635	424.125	553.769	424.938	552.903	425.751	552.037	426.563	551.169	427.376	550.3	428.189	549.43	429.002	548.558	429.815	547.684	430.627	546.808	431.44	545.929	432.253	545.048	433.066	544.164	433.879	543.277	434.692	542.386	435.505	541.492	436.318	540.593	437.131	539.691	437.944	538.784	438.757	537.873	439.57	536.957	440.384	536.036	441.197	535.109
PtK_GFP-tub_mCh-p50	180903_018_03a_MAX29-40	425.25	541	424.382	542.063	423.513	543.127	422.645	544.192	421.776	545.26	420.906	546.332	420.037	547.407	419.167	548.487	418.296	549.572	417.425	550.664	416.552	551.764	415.679	552.871	414.805	553.987	413.93	555.113	413.054	556.249	412.177	557.396	411.299	558.556	410.419	559.728	409.538	560.914	408.655	562.115	407.77	563.331	406.884	564.562	405.996	565.811	405.106	567.077
PtK_GFP-tub_mCh-p50	180903_018_03b_MAX11-26	441.25	514.75	441.87	513.614	442.49	512.477	443.11	511.34	443.731	510.204	444.352	509.067	444.974	507.93	445.596	506.793	446.219	505.655	446.844	504.518	447.469	503.38	448.095	502.242	448.723	501.103	449.352	499.965	449.982	498.825	450.614	497.686	451.248	496.546	451.884	495.406	452.521	494.265	453.161	493.124	453.803	491.982	454.447	490.839	455.094	489.696	455.743	488.553
PtK_GFP-tub_mCh-p50	180903_018_04a_MAX29-34	457.25	601.5	456.523	603.124	455.795	604.747	455.068	606.37	454.342	607.993	453.616	609.616	452.891	611.238	452.166	612.859	451.443	614.479	450.721	616.098	450	617.717	449.281	619.334	448.563	620.95	447.848	622.564	447.134	624.177	446.422	625.788	445.713	627.398	445.006	629.006	444.301	630.611	443.599	632.215	442.9	633.816	442.204	635.415	441.511	637.011	440.822	638.605
PtK_GFP-tub_mCh-p50	180903_018_04b_MAX16-29	467.75	570	468.369	568.772	468.988	567.545	469.607	566.317	470.226	565.089	470.844	563.861	471.463	562.633	472.081	561.406	472.7	560.178	473.318	558.95	473.936	557.722	474.554	556.493	475.171	555.265	475.789	554.037	476.406	552.808	477.022	551.58	477.639	550.351	478.255	549.122	478.871	547.894	479.486	546.664	480.101	545.435	480.716	544.206	481.33	542.976	481.943	541.747
PtK_GFP-tub_mCh-p50	180903_018_05a_MAX7-11	433.167	642.833	432.248	643.569	431.33	644.305	430.412	645.041	429.494	645.777	428.577	646.512	427.661	647.247	426.745	647.981	425.831	648.714	424.918	649.447	424.007	650.179	423.097	650.909	422.189	651.639	421.282	652.368	420.378	653.096	419.476	653.822	418.576	654.546	417.679	655.27	416.784	655.991	415.893	656.711	415.004	657.429	414.118	658.145	413.236	658.859	412.357	659.572
PtK_GFP-tub_mCh-p50	180903_018_05b_MAX7-10	452.25	622	453.068	621.21	453.887	620.42	454.705	619.631	455.522	618.842	456.339	618.054	457.156	617.266	457.972	616.479	458.787	615.693	459.601	614.908	460.414	614.124	461.226	613.341	462.037	612.56	462.846	611.781	463.654	611.003	464.46	610.227	465.264	609.453	466.067	608.681	466.868	607.912	467.666	607.145	468.462	606.38	469.256	605.618	470.048	604.859	470.837	604.102
PtK_GFP-tub_mCh-p50	180903_018_06a_MAX20-31	459.833	639.833	459.237	640.625	458.641	641.417	458.045	642.209	457.448	643.002	456.852	643.795	456.255	644.589	455.659	645.383	455.062	646.178	454.464	646.975	453.867	647.772	453.269	648.57	452.671	649.37	452.072	650.172	451.473	650.975	450.873	651.779	450.273	652.586	449.673	653.394	449.072	654.204	448.47	655.017	447.868	655.832	447.265	656.649	446.662	657.469	446.058	658.292
PtK_GFP-tub_mCh-p50	180903_018_06b_MAX10-20	482.167	616.167	483.043	615.248	483.919	614.329	484.795	613.41	485.671	612.491	486.547	611.574	487.423	610.657	488.298	609.74	489.174	608.824	490.05	607.91	490.926	606.996	491.802	606.084	492.678	605.173	493.553	604.264	494.429	603.356	495.305	602.45	496.18	601.546	497.056	600.643	497.932	599.743	498.807	598.846	499.682	597.95	500.558	597.057	501.433	596.167	502.308	595.279
PtK_GFP-tub_mCh-p50	180903_018_07a_MAX22-28	501.75	643.75	501.276	644.482	500.802	645.213	500.328	645.945	499.854	646.677	499.379	647.408	498.904	648.14	498.429	648.872	497.954	649.604	497.478	650.335	497.002	651.067	496.525	651.799	496.048	652.531	495.57	653.263	495.091	653.995	494.612	654.727	494.132	655.459	493.651	656.191	493.169	656.923	492.687	657.655	492.203	658.387	491.718	659.119	491.232	659.852	490.745	660.584
PtK_GFP-tub_mCh-p50	180903_018_07b_MAX9-18	522	613.5	522.804	612.638	523.607	611.775	524.411	610.913	525.214	610.052	526.016	609.19	526.819	608.328	527.62	607.467	528.422	606.606	529.222	605.746	530.021	604.886	530.82	604.026	531.617	603.168	532.414	602.309	533.209	601.452	534.002	600.595	534.795	599.739	535.586	598.884	536.375	598.029	537.163	597.176	537.948	596.323	538.732	595.472	539.514	594.622	540.294	593.773
PtK_GFP-tub_mCh-p50	180903_018_08a_MAX32-37	516.333	655.667	515.775	656.461	515.217	657.255	514.658	658.049	514.098	658.843	513.538	659.638	512.976	660.433	512.412	661.229	511.847	662.024	511.279	662.821	510.709	663.618	510.137	664.415	509.562	665.214	508.983	666.013	508.402	666.813	507.817	667.614	507.227	668.416	506.634	669.219	506.036	670.023	505.434	670.828	504.827	671.634	504.214	672.442	503.596	673.251	502.973	674.062
PtK_GFP-tub_mCh-p50	180903_018_08b_MAX22-30	531.333	626	531.898	624.915	532.463	623.831	533.028	622.746	533.592	621.662	534.156	620.579	534.719	619.495	535.282	618.413	535.844	617.331	536.405	616.251	536.966	615.171	537.525	614.092	538.083	613.015	538.64	611.939	539.195	610.864	539.749	609.791	540.302	608.719	540.852	607.649	541.402	606.582	541.949	605.516	542.494	604.452	543.037	603.39	543.578	602.331	544.116	601.274
PtK_GFP-tub_mCh-p50	180903_018_10a_MAX7-12	508	729.125	507.583	729.612	507.166	730.1	506.749	730.587	506.332	731.074	505.916	731.562	505.5	732.05	505.084	732.538	504.67	733.025	504.256	733.514	503.842	734.002	503.43	734.491	503.018	734.98	502.608	735.469	502.198	735.959	501.79	736.449	501.383	736.94	500.977	737.43	500.573	737.922	500.17	738.414	499.769	738.906	499.369	739.399	498.972	739.892	498.576	740.386
PtK_GFP-tub_mCh-p50	180903_018_10b_MAX5-15	527.5	708.5	528.601	707.503	529.7	706.505	530.799	705.505	531.895	704.505	532.989	703.501	534.079	702.495	535.165	701.485	536.246	700.472	537.322	699.453	538.391	698.429	539.453	697.4	540.508	696.364	541.554	695.321	542.591	694.271	543.618	693.212	544.635	692.145	545.641	691.068	546.635	689.981	547.617	688.884	548.585	687.776	549.539	686.656	550.479	685.524	551.403	684.379
PtK_GFP-tub_mCh-p50	180903_018_11a_MAX35-44	577.333	646.5	577.123	647.313	576.912	648.125	576.701	648.938	576.491	649.75	576.28	650.562	576.069	651.373	575.858	652.184	575.648	652.995	575.437	653.804	575.226	654.613	575.015	655.422	574.804	656.229	574.593	657.035	574.382	657.841	574.171	658.645	573.96	659.448	573.749	660.249	573.538	661.049	573.326	661.848	573.115	662.645	572.903	663.441	572.692	664.235	572.48	665.027
PtK_GFP-tub_mCh-p50	180903_018_11b_MAX26-33	585	625.167	585.284	624.637	585.569	624.107	585.854	623.577	586.138	623.048	586.422	622.518	586.705	621.988	586.988	621.458	587.271	620.928	587.553	620.397	587.835	619.867	588.116	619.336	588.396	618.805	588.675	618.274	588.954	617.743	589.231	617.212	589.508	616.68	589.783	616.148	590.058	615.616	590.331	615.083	590.602	614.55	590.873	614.017	591.142	613.483	591.41	612.949
PtK_GFP-tub_mCh-p50	181001_002_01a_MAX3-10	195	172	194.463	172.614	193.924	173.24	193.38	173.89	192.829	174.574	192.269	175.306	191.691	176.097	191.077	176.962	190.409	177.914	189.671	178.968	188.844	180.137	187.911	181.435	186.856	182.875	185.687	184.441	184.434	186.097	183.127	187.805	181.793	189.529	180.463	191.231	179.167	192.874	177.933	194.422	176.79	195.837	175.769	197.082	174.898	198.12	174.19	198.94
PtK_GFP-tub_mCh-p50	181001_002_01b_MAX3-10	197.5	150.5	197.656	150.142	197.811	149.785	197.963	149.428	198.112	149.072	198.257	148.718	198.396	148.365	198.528	148.014	198.652	147.665	198.767	147.319	198.872	146.975	198.966	146.635	199.047	146.298	199.117	145.962	199.176	145.626	199.226	145.286	199.269	144.938	199.306	144.581	199.339	144.211	199.37	143.825	199.399	143.421	199.428	142.995	199.46	142.544	199.495	142.066
PtK_GFP-tub_mCh-p50	181001_002_02a_MAX4-15	219	185	218.339	185.596	217.678	186.201	217.014	186.821	216.348	187.465	215.678	188.142	215.003	188.858	214.322	189.622	213.635	190.441	212.939	191.316	212.229	192.24	211.501	193.204	210.75	194.203	209.972	195.228	209.164	196.273	208.319	197.329	207.435	198.39	206.506	199.449	205.529	200.498	204.505	201.533	203.445	202.555	202.358	203.562	201.254	204.556	200.142	205.537
PtK_GFP-tub_mCh-p50	181001_002_02b_MAX1-11	241.5	176.833	241.753	176.663	242.012	176.492	242.283	176.316	242.572	176.134	242.885	175.944	243.228	175.744	243.606	175.533	244.025	175.308	244.484	175.07	244.979	174.819	245.506	174.557	246.061	174.285	246.642	174.004	247.243	173.715	247.863	173.419	248.496	173.116	249.141	172.809	249.791	172.497	250.445	172.183	251.099	171.866	251.749	171.549	252.395	171.231	253.038	170.912
PtK_GFP-tub_mCh-p50	181001_002_03a_MAX1-8	223	232	221.687	232.862	220.374	233.724	219.062	234.586	217.751	235.448	216.441	236.309	215.133	237.17	213.827	238.03	212.523	238.89	211.223	239.749	209.925	240.607	208.63	241.465	207.34	242.321	206.053	243.176	204.771	244.031	203.494	244.883	202.222	245.735	200.955	246.585	199.694	247.434	198.44	248.281	197.191	249.126	195.95	249.97	194.716	250.812	193.489	251.652
PtK_GFP-tub_mCh-p50	181001_002_03b_MAX1-8	244	225	245.45	224.495	246.901	223.991	248.352	223.488	249.804	222.988	251.257	222.491	252.711	221.998	254.167	221.509	255.626	221.026	257.087	220.549	258.55	220.079	260.017	219.618	261.486	219.164	262.959	218.72	264.437	218.287	265.918	217.864	267.403	217.453	268.894	217.054	270.389	216.669	271.89	216.298	273.396	215.941	274.909	215.601	276.427	215.277	277.952	214.97
PtK_GFP-tub_mCh-p50	181001_002_04a_MAX18-37	233	285	231.439	285.681	229.877	286.361	228.317	287.041	226.756	287.719	225.197	288.396	223.639	289.07	222.083	289.743	220.527	290.412	218.974	291.078	217.423	291.741	215.873	292.399	214.327	293.053	212.783	293.702	211.242	294.346	209.704	294.985	208.169	295.617	206.638	296.243	205.111	296.861	203.588	297.473	202.069	298.077	200.554	298.673	199.044	299.26	197.539	299.838
PtK_GFP-tub_mCh-p50	181001_002_04b_MAX20-39	259	281	260.986	280.476	262.972	279.952	264.959	279.427	266.947	278.901	268.935	278.373	270.924	277.844	272.915	277.314	274.907	276.781	276.901	276.245	278.897	275.707	280.895	275.165	282.896	274.62	284.899	274.071	286.905	273.518	288.914	272.96	290.927	272.397	292.943	271.83	294.962	271.257	296.986	270.678	299.014	270.093	301.046	269.502	303.082	268.904	305.124	268.298
PtK_GFP-tub_mCh-p50	181001_002_05a_MAX9-24	266	305	265.015	305.244	264.03	305.489	263.044	305.733	262.059	305.977	261.073	306.222	260.086	306.466	259.1	306.711	258.112	306.955	257.124	307.199	256.136	307.444	255.146	307.688	254.156	307.933	253.165	308.177	252.173	308.422	251.18	308.667	250.185	308.911	249.19	309.156	248.193	309.401	247.194	309.646	246.195	309.89	245.193	310.135	244.19	310.38	243.186	310.625
PtK_GFP-tub_mCh-p50	181001_002_05b_MAX17-27	292	295	292.947	295.16	293.893	295.32	294.838	295.48	295.783	295.638	296.727	295.796	297.669	295.952	298.61	296.106	299.548	296.258	300.485	296.407	301.419	296.554	302.35	296.698	303.278	296.839	304.203	296.976	305.124	297.109	306.041	297.238	306.954	297.363	307.863	297.482	308.767	297.597	309.666	297.706	310.559	297.81	311.447	297.908	312.329	297.999	313.205	298.084
PtK_GFP-tub_mCh-p50	181001_002_06a_MAX12-30	260	338	258.207	338.034	256.414	338.068	254.619	338.102	252.821	338.134	251.021	338.164	249.216	338.193	247.407	338.219	245.593	338.242	243.773	338.262	241.945	338.279	240.111	338.292	238.267	338.301	236.415	338.304	234.552	338.303	232.679	338.296	230.794	338.284	228.897	338.265	226.987	338.239	225.063	338.206	223.125	338.166	221.171	338.118	219.202	338.062	217.215	337.997
PtK_GFP-tub_mCh-p50	181001_002_06b_MAX26-33	275.833	332.167	276.736	331.599	277.645	330.994	278.569	330.318	279.513	329.533	280.476	328.647	281.442	327.725	282.394	326.834	283.317	326.046	284.207	325.388	285.1	324.789	286.035	324.162	287.049	323.424	288.153	322.549	289.331	321.567	290.567	320.507	291.842	319.402	293.142	318.282	294.451	317.17	295.762	316.08	297.064	315.027	298.347	314.027	299.603	313.092	300.829	312.226
PtK_GFP-tub_mCh-p50	181001_002_07a_MAX13-25	236	353	234.905	352.931	233.81	352.861	232.715	352.791	231.62	352.722	230.526	352.651	229.432	352.581	228.339	352.51	227.246	352.438	226.154	352.366	225.063	352.293	223.973	352.22	222.883	352.145	221.795	352.07	220.708	351.994	219.622	351.916	218.537	351.838	217.454	351.758	216.372	351.677	215.292	351.594	214.213	351.511	213.136	351.425	212.061	351.338	210.988	351.249
PtK_GFP-tub_mCh-p50	181001_002_07b_MAX14-22	267	355	267.998	355.035	268.996	355.071	269.994	355.105	270.993	355.139	271.993	355.173	272.993	355.205	273.995	355.235	274.998	355.264	276.003	355.291	277.009	355.317	278.017	355.34	279.027	355.36	280.04	355.378	281.055	355.392	282.072	355.404	283.092	355.412	284.116	355.417	285.142	355.417	286.173	355.414	287.206	355.406	288.243	355.394	289.284	355.377	290.33	355.355
PtK_GFP-tub_mCh-p50	181001_002_08a_MAX13-20	220.5	376.833	219.581	376.695	218.661	376.556	217.743	376.417	216.825	376.278	215.907	376.138	214.991	375.998	214.076	375.857	213.162	375.715	212.25	375.572	211.339	375.429	210.431	375.284	209.525	375.138	208.621	374.991	207.72	374.842	206.821	374.692	205.926	374.54	205.034	374.386	204.145	374.23	203.26	374.072	202.379	373.913	201.501	373.751	200.628	373.586	199.76	373.42
PtK_GFP-tub_mCh-p50	181001_002_08b_MAX16-24	252	381	254.043	381.342	256.085	381.683	258.128	382.022	260.169	382.36	262.21	382.694	264.25	383.026	266.288	383.352	268.326	383.674	270.361	383.99	272.395	384.3	274.427	384.602	276.457	384.897	278.484	385.183	280.509	385.46	282.531	385.727	284.55	385.983	286.566	386.228	288.579	386.46	290.588	386.68	292.593	386.887	294.595	387.079	296.592	387.256	298.585	387.417
PtK_GFP-tub_mCh-p50	181001_002_09a_MAX1-9	213.25	411.25	212.689	410.941	212.128	410.633	211.567	410.325	211.005	410.019	210.443	409.715	209.881	409.413	209.319	409.114	208.755	408.818	208.191	408.526	207.627	408.238	207.062	407.954	206.496	407.676	205.929	407.404	205.361	407.137	204.791	406.877	204.221	406.624	203.65	406.378	203.077	406.141	202.503	405.911	201.927	405.691	201.35	405.48	200.771	405.279	200.19	405.087
PtK_GFP-tub_mCh-p50	181001_002_09b_MAX3-11	235	403	236.637	402.241	238.275	401.481	239.913	400.719	241.552	399.955	243.192	399.189	244.833	398.418	246.475	397.644	248.119	396.864	249.765	396.078	251.413	395.286	253.063	394.486	254.716	393.678	256.372	392.861	258.031	392.035	259.692	391.199	261.358	390.351	263.027	389.492	264.7	388.62	266.378	387.735	268.059	386.837	269.746	385.923	271.437	384.994	273.133	384.049
PtK_GFP-tub_mCh-p50	181005_001_01a_MAX9-17	482	210	481.172	209.358	480.344	208.716	479.517	208.074	478.689	207.434	477.862	206.795	477.035	206.158	476.208	205.523	475.382	204.891	474.557	204.261	473.731	203.635	472.907	203.012	472.084	202.393	471.261	201.778	470.439	201.167	469.618	200.562	468.798	199.962	467.978	199.368	467.161	198.779	466.344	198.197	465.528	197.622	464.714	197.053	463.901	196.492	463.09	195.939
PtK_GFP-tub_mCh-p50	181005_001_01b_MAX13-17	506	227	506.752	227.335	507.503	227.67	508.255	228.005	509.007	228.34	509.758	228.676	510.508	229.013	511.259	229.351	512.009	229.69	512.758	230.029	513.507	230.37	514.255	230.713	515.003	231.056	515.75	231.402	516.496	231.749	517.241	232.099	517.985	232.45	518.728	232.804	519.47	233.16	520.211	233.518	520.95	233.879	521.688	234.243	522.426	234.61	523.161	234.98
PtK_GFP-tub_mCh-p50	181005_001_02a_MAX21-24	427	253	426.208	252.605	425.416	252.21	424.625	251.815	423.833	251.421	423.041	251.026	422.249	250.631	421.457	250.237	420.666	249.842	419.874	249.448	419.083	249.054	418.291	248.66	417.5	248.266	416.709	247.872	415.917	247.478	415.126	247.085	414.335	246.691	413.544	246.298	412.754	245.905	411.963	245.513	411.173	245.12	410.382	244.728	409.592	244.337	408.802	243.945
PtK_GFP-tub_mCh-p50	181005_001_02b_MAX21-27	459	267	459.48	267.599	459.975	268.19	460.501	268.765	461.072	269.315	461.693	269.837	462.338	270.336	462.974	270.824	463.569	271.309	464.107	271.792	464.611	272.25	465.111	272.653	465.635	272.981	466.185	273.269	466.748	273.584	467.312	273.988	467.869	274.477	468.416	274.99	468.952	275.462	469.478	275.843	470.015	276.151	470.589	276.427	471.224	276.711	471.903	277.021
PtK_GFP-tub_mCh-p50	181005_001_03a_MAX31-37	387.5	258.75	386.932	258.359	386.363	257.957	385.793	257.533	385.218	257.081	384.628	256.618	384.005	256.167	383.336	255.75	382.646	255.348	381.988	254.917	381.414	254.41	380.942	253.819	380.503	253.234	380.011	252.758	379.412	252.457	378.777	252.24	378.205	251.971	377.753	251.564	377.334	251.082	376.836	250.618	376.206	250.22	375.503	249.865	374.794	249.522	374.132	249.163
PtK_GFP-tub_mCh-p50	181005_001_03b_MAX18-30	425	278.5	426.317	279.368	427.633	280.237	428.949	281.106	430.265	281.976	431.58	282.846	432.895	283.718	434.209	284.591	435.522	285.466	436.833	286.343	438.144	287.222	439.453	288.103	440.761	288.986	442.067	289.873	443.372	290.762	444.674	291.655	445.975	292.551	447.273	293.451	448.57	294.355	449.863	295.262	451.155	296.175	452.443	297.092	453.729	298.014	455.012	298.94
PtK_GFP-tub_mCh-p50	181005_001_04a_MAX10-14	374.833	266.833	374.192	266.318	373.551	265.803	372.91	265.289	372.268	264.775	371.626	264.262	370.984	263.749	370.341	263.238	369.698	262.728	369.054	262.219	368.41	261.712	367.764	261.207	367.118	260.704	366.471	260.203	365.823	259.704	365.174	259.208	364.524	258.714	363.872	258.224	363.219	257.736	362.565	257.252	361.909	256.771	361.252	256.294	360.593	255.82	359.932	255.351
PtK_GFP-tub_mCh-p50	181005_001_04b_MAX8-14	393.5	275.833	394.295	276.459	395.09	277.085	395.886	277.711	396.682	278.337	397.478	278.963	398.276	279.589	399.074	280.214	399.873	280.84	400.673	281.465	401.474	282.09	402.276	282.714	403.08	283.339	403.886	283.963	404.693	284.586	405.502	285.21	406.314	285.833	407.127	286.455	407.943	287.077	408.761	287.699	409.582	288.32	410.405	288.94	411.231	289.56	412.06	290.18
PtK_GFP-tub_mCh-p50	181005_001_05a_MAX10-17	352.167	287.833	351.472	287.115	350.778	286.396	350.084	285.677	349.389	284.957	348.695	284.236	348	283.513	347.306	282.789	346.611	282.062	345.916	281.334	345.221	280.603	344.526	279.869	343.831	279.132	343.136	278.391	342.44	277.647	341.745	276.899	341.049	276.147	340.353	275.39	339.656	274.628	338.96	273.861	338.263	273.089	337.566	272.311	336.869	271.527	336.171	270.737
PtK_GFP-tub_mCh-p50	181005_001_05b_MAX11-14	390	308	390.543	308.423	391.086	308.845	391.63	309.267	392.174	309.688	392.72	310.109	393.266	310.529	393.813	310.948	394.362	311.365	394.912	311.782	395.465	312.197	396.019	312.61	396.576	313.021	397.135	313.43	397.696	313.837	398.261	314.242	398.829	314.644	399.399	315.043	399.974	315.44	400.552	315.833	401.134	316.224	401.72	316.61	402.31	316.994	402.905	317.373
PtK_GFP-tub_mCh-p50	181005_001_06a_MAX30-41	351	299	350.063	298.47	349.127	297.94	348.19	297.409	347.254	296.879	346.319	296.349	345.384	295.818	344.45	295.288	343.516	294.757	342.583	294.227	341.652	293.696	340.721	293.165	339.792	292.634	338.864	292.103	337.937	291.571	337.012	291.039	336.089	290.508	335.168	289.976	334.248	289.443	333.33	288.911	332.415	288.378	331.502	287.845	330.591	287.311	329.683	286.777
PtK_GFP-tub_mCh-p50	181005_001_06b_MAX18-32	369	307	370.495	308	371.989	308.999	373.484	309.998	374.979	310.994	376.474	311.988	377.969	312.979	379.465	313.966	380.961	314.949	382.457	315.928	383.954	316.9	385.451	317.867	386.949	318.827	388.447	319.78	389.946	320.725	391.445	321.662	392.945	322.589	394.446	323.507	395.948	324.415	397.45	325.312	398.953	326.197	400.458	327.07	401.963	327.931	403.469	328.778
PtK_GFP-tub_mCh-p50	181005_001_07a_MAX19-29	323.5	324.5	322.357	323.623	321.214	322.746	320.071	321.87	318.929	320.994	317.788	320.118	316.648	319.243	315.509	318.37	314.371	317.497	313.235	316.625	312.101	315.755	310.969	314.886	309.839	314.019	308.712	313.154	307.587	312.29	306.465	311.428	305.346	310.569	304.231	309.712	303.118	308.858	302.01	308.006	300.905	307.158	299.804	306.312	298.708	305.469	297.616	304.629
PtK_GFP-tub_mCh-p50	181005_001_07b_MAX14-22	339	341	339.84	341.46	340.681	341.921	341.521	342.382	342.36	342.845	343.2	343.309	344.039	343.774	344.877	344.242	345.715	344.712	346.552	345.185	347.389	345.661	348.224	346.14	349.059	346.623	349.892	347.11	350.724	347.602	351.555	348.099	352.385	348.601	353.214	349.108	354.041	349.621	354.866	350.14	355.689	350.666	356.511	351.199	357.331	351.739	358.149	352.287
PtK_GFP-tub_mCh-p50	181005_001_08a_MAX31-36	312	336	311.158	335.667	310.317	335.333	309.476	335	308.636	334.667	307.797	334.334	306.959	334.002	306.123	333.67	305.288	333.338	304.455	333.007	303.625	332.676	302.797	332.345	301.971	332.016	301.149	331.687	300.33	331.358	299.514	331.031	298.702	330.704	297.894	330.378	297.089	330.053	296.29	329.73	295.495	329.407	294.705	329.085	293.92	328.765	293.141	328.445
PtK_GFP-tub_mCh-p50	181005_001_08b_MAX28-34	338.5	349.5	339.236	350.135	339.972	350.762	340.707	351.372	341.441	351.955	342.176	352.505	342.922	353.026	343.692	353.522	344.5	354	345.354	354.466	346.252	354.923	347.184	355.377	348.143	355.832	349.122	356.292	350.111	356.751	351.101	357.199	352.084	357.626	353.05	358.02	353.994	358.377	354.924	358.714	355.854	359.053	356.795	359.416	357.757	359.822	358.737	360.263
PtK_GFP-tub_mCh-p50	181005_001_09a_MAX14-18	251	323	250.115	322.461	249.231	321.922	248.346	321.384	247.464	320.845	246.582	320.307	245.701	319.769	244.823	319.232	243.946	318.695	243.072	318.159	242.201	317.624	241.333	317.089	240.468	316.556	239.606	316.023	238.749	315.491	237.895	314.96	237.047	314.431	236.203	313.902	235.364	313.375	234.53	312.85	233.703	312.325	232.881	311.803	232.066	311.282	231.257	310.763
PtK_GFP-tub_mCh-p50	181005_001_09b_MAX14-18	259.25	328	259.951	328.507	260.651	329.013	261.352	329.519	262.052	330.026	262.752	330.532	263.452	331.037	264.152	331.543	264.851	332.048	265.55	332.553	266.249	333.058	266.947	333.562	267.644	334.065	268.341	334.568	269.038	335.071	269.733	335.572	270.428	336.074	271.123	336.574	271.816	337.074	272.509	337.573	273.201	338.071	273.892	338.568	274.582	339.064	275.271	339.559
PtK_GFP-tub_mCh-p50	181005_001_10a_MAX27-33	250	403	248.41	401.968	246.821	400.935	245.231	399.903	243.642	398.87	242.053	397.837	240.464	396.803	238.875	395.769	237.287	394.735	235.699	393.7	234.111	392.664	232.524	391.627	230.938	390.59	229.352	389.552	227.767	388.512	226.182	387.472	224.598	386.43	223.015	385.387	221.433	384.343	219.851	383.298	218.271	382.251	216.691	381.203	215.113	380.152	213.536	379.101
PtK_GFP-tub_mCh-p50	181005_001_10b_MAX23-31	267	412	267.947	412.976	268.901	413.945	269.871	414.901	270.865	415.839	271.891	416.753	272.958	417.647	274.077	418.519	275.256	419.373	276.499	420.206	277.806	421.019	279.176	421.808	280.608	422.574	282.073	423.327	283.518	424.088	284.89	424.878	286.135	425.72	287.242	426.614	288.277	427.529	289.316	428.425	290.433	429.267	291.656	430.06	292.967	430.844	294.349	431.664
PtK_GFP-tub_mCh-p50	190624_001_01a_MAX4-12	265.167	333	264.736	333.348	264.304	333.696	263.873	334.044	263.442	334.392	263.011	334.739	262.58	335.085	262.149	335.431	261.718	335.777	261.287	336.121	260.857	336.465	260.426	336.808	259.995	337.149	259.565	337.49	259.134	337.829	258.704	338.166	258.274	338.503	257.844	338.837	257.414	339.17	256.984	339.502	256.555	339.831	256.125	340.158	255.696	340.484	255.267	340.807
PtK_GFP-tub_mCh-p50	190624_001_01b_MAX5-11	279.75	324	280.185	323.542	280.62	323.084	281.055	322.625	281.49	322.167	281.925	321.709	282.36	321.251	282.795	320.793	283.23	320.334	283.665	319.876	284.1	319.418	284.535	318.96	284.97	318.502	285.405	318.044	285.839	317.586	286.274	317.128	286.709	316.67	287.143	316.212	287.578	315.755	288.012	315.297	288.447	314.839	288.881	314.381	289.316	313.924	289.75	313.466
PtK_GFP-tub_mCh-p50	190624_001_02a_MAX22-30	256.833	306	256.376	306.188	255.919	306.376	255.462	306.565	255.005	306.753	254.549	306.942	254.092	307.131	253.636	307.32	253.179	307.51	252.723	307.7	252.268	307.89	251.812	308.081	251.357	308.273	250.902	308.465	250.448	308.658	249.994	308.851	249.54	309.046	249.087	309.241	248.635	309.437	248.183	309.634	247.731	309.832	247.28	310.031	246.83	310.231	246.381	310.432
PtK_GFP-tub_mCh-p50	190624_001_02b_MAX13-29	273.333	297.667	273.886	297.336	274.439	297.006	274.992	296.676	275.545	296.346	276.098	296.016	276.651	295.687	277.204	295.358	277.757	295.03	278.309	294.702	278.861	294.376	279.414	294.05	279.966	293.724	280.517	293.4	281.069	293.077	281.621	292.755	282.172	292.434	282.723	292.115	283.274	291.796	283.824	291.479	284.374	291.164	284.924	290.85	285.474	290.538	286.023	290.228
PtK_GFP-tub_mCh-p50	190624_001_03a_MAX15-27	200.75	294.875	200.501	295.27	200.253	295.665	200.004	296.06	199.755	296.455	199.506	296.85	199.257	297.246	199.007	297.641	198.758	298.037	198.507	298.432	198.257	298.828	198.006	299.224	197.755	299.621	197.503	300.017	197.251	300.414	196.998	300.811	196.744	301.209	196.49	301.606	196.235	302.005	195.98	302.403	195.723	302.802	195.466	303.201	195.208	303.601	194.949	304.001
PtK_GFP-tub_mCh-p50	190624_001_03b_MAX7-16	207.667	280.833	207.905	280.291	208.144	279.748	208.383	279.205	208.622	278.663	208.861	278.12	209.1	277.578	209.339	277.036	209.578	276.494	209.817	275.952	210.057	275.41	210.296	274.869	210.535	274.328	210.775	273.787	211.014	273.247	211.254	272.707	211.494	272.167	211.734	271.628	211.974	271.089	212.214	270.55	212.454	270.012	212.695	269.475	212.935	268.938	213.176	268.402
PtK_GFP-tub_mCh-p50	190624_001_04a_MAX16-26	184.667	282.167	184.395	282.585	184.124	283.003	183.853	283.421	183.582	283.839	183.312	284.257	183.043	284.675	182.774	285.094	182.507	285.512	182.24	285.931	181.975	286.35	181.711	286.769	181.449	287.188	181.188	287.608	180.93	288.027	180.673	288.447	180.418	288.868	180.166	289.288	179.915	289.709	179.668	290.131	179.423	290.552	179.18	290.974	178.941	291.397	178.705	291.82
PtK_GFP-tub_mCh-p50	190624_001_04b_MAX9-16	189.125	261.875	189.261	261.728	189.398	261.582	189.534	261.436	189.671	261.289	189.807	261.143	189.943	260.996	190.079	260.85	190.216	260.703	190.352	260.557	190.489	260.41	190.625	260.264	190.761	260.117	190.898	259.971	191.034	259.825	191.171	259.678	191.307	259.532	191.443	259.385	191.579	259.239	191.716	259.092	191.852	258.946	191.989	258.799	192.125	258.653	192.261	258.506
PtK_GFP-tub_mCh-p50	190624_001_07a_MAX8-15	209.75	201.917	209.935	202.273	210.119	202.63	210.304	202.987	210.489	203.343	210.675	203.699	210.861	204.054	211.047	204.409	211.235	204.763	211.423	205.117	211.612	205.47	211.802	205.822	211.994	206.174	212.186	206.524	212.38	206.873	212.575	207.221	212.772	207.568	212.971	207.913	213.171	208.258	213.373	208.6	213.577	208.941	213.783	209.281	213.992	209.618	214.202	209.954
PtK_GFP-tub_mCh-p50	190624_001_07b_MAX12-19	207.25	184	207.677	183.449	208.1	182.895	208.514	182.338	208.913	181.773	209.295	181.199	209.653	180.614	209.983	180.015	210.282	179.4	210.543	178.767	210.764	178.114	210.938	177.438	211.062	176.737	211.138	176.013	211.174	175.273	211.179	174.521	211.162	173.763	211.131	173.006	211.094	172.254	211.06	171.514	211.037	170.791	211.034	170.092	211.06	169.421	211.122	168.785
PtK_GFP-tub_mCh-p50	190624_001_08a_MAX25-33	249	232	248.783	232.136	248.566	232.273	248.349	232.409	248.131	232.546	247.914	232.682	247.697	232.818	247.48	232.954	247.263	233.091	247.046	233.227	246.828	233.364	246.611	233.5	246.394	233.636	246.177	233.773	245.96	233.909	245.742	234.046	245.525	234.182	245.308	234.318	245.091	234.454	244.874	234.591	244.657	234.727	244.439	234.864	244.222	235	244.005	235.136
PtK_GFP-tub_mCh-p50	190624_001_08b_MAX19-28	263	220	263.426	219.761	263.852	219.522	264.278	219.282	264.703	219.043	265.128	218.803	265.553	218.564	265.978	218.324	266.402	218.084	266.826	217.845	267.25	217.605	267.672	217.364	268.094	217.124	268.515	216.884	268.936	216.643	269.355	216.402	269.774	216.161	270.192	215.919	270.608	215.677	271.024	215.435	271.439	215.192	271.852	214.95	272.264	214.707	272.675	214.463
PtK_GFP-tub_mCh-p50	190624_002_01a_MAX24-32	183	231	182.47	230.18	181.941	229.36	181.412	228.539	180.884	227.718	180.357	226.895	179.831	226.072	179.307	225.247	178.785	224.421	178.264	223.593	177.747	222.762	177.232	221.93	176.72	221.095	176.211	220.258	175.706	219.417	175.204	218.574	174.707	217.727	174.214	216.876	173.725	216.022	173.241	215.163	172.762	214.301	172.289	213.434	171.821	212.562	171.36	211.685
PtK_GFP-tub_mCh-p50	190624_002_01b_MAX21-27	200.667	249.833	201.02	250.217	201.374	250.601	201.728	250.985	202.081	251.369	202.435	251.754	202.79	252.138	203.145	252.524	203.5	252.909	203.855	253.296	204.211	253.682	204.568	254.07	204.925	254.458	205.282	254.847	205.641	255.237	206	255.627	206.36	256.019	206.721	256.412	207.083	256.806	207.446	257.201	207.81	257.597	208.175	257.995	208.541	258.394	208.908	258.794
PtK_GFP-tub_mCh-p50	190624_002_02a_MAX27-34	193	209.75	192.848	209.45	192.697	209.15	192.545	208.85	192.394	208.55	192.242	208.25	192.091	207.95	191.939	207.65	191.788	207.35	191.636	207.049	191.485	206.749	191.334	206.448	191.182	206.147	191.031	205.846	190.88	205.545	190.729	205.244	190.578	204.942	190.427	204.641	190.276	204.339	190.125	204.036	189.974	203.734	189.824	203.431	189.673	203.129	189.523	202.825
PtK_GFP-tub_mCh-p50	190624_002_02b_MAX22-30	203.75	228.75	204.232	229.413	204.713	230.076	205.194	230.739	205.676	231.403	206.157	232.066	206.639	232.731	207.12	233.395	207.602	234.06	208.083	234.726	208.564	235.393	209.046	236.06	209.527	236.728	210.008	237.397	210.49	238.067	210.971	238.738	211.452	239.411	211.934	240.084	212.415	240.759	212.896	241.435	213.377	242.113	213.858	242.793	214.339	243.474	214.82	244.156
PtK_GFP-tub_mCh-p50	190624_002_03a_MAX7-12	236.167	203.833	235.356	202.76	234.544	201.686	233.732	200.613	232.92	199.541	232.107	198.47	231.292	197.4	230.477	196.332	229.66	195.266	228.841	194.201	228.021	193.139	227.198	192.08	226.374	191.024	225.546	189.971	224.716	188.921	223.883	187.875	223.047	186.833	222.208	185.796	221.364	184.763	220.518	183.734	219.667	182.711	218.812	181.693	217.953	180.68	217.089	179.674
PtK_GFP-tub_mCh-p50	190624_002_03b_MAX10-25	246.5	220.5	246.942	221.216	247.412	221.944	247.938	222.692	248.548	223.473	249.27	224.297	250.114	225.167	251.066	226.072	252.11	227.003	253.229	227.949	254.406	228.9	255.626	229.845	256.871	230.773	258.13	231.68	259.396	232.566	260.664	233.433	261.927	234.283	263.18	235.119	264.418	235.942	265.635	236.755	266.826	237.56	267.987	238.364	269.116	239.179	270.211	240.015
PtK_GFP-tub_mCh-p50	190624_002_04a_MAX29-33	254.833	235.833	254.333	235.337	253.833	234.841	253.333	234.346	252.833	233.85	252.333	233.354	251.834	232.858	251.335	232.363	250.836	231.868	250.338	231.373	249.841	230.878	249.344	230.384	248.848	229.889	248.352	229.395	247.857	228.902	247.364	228.409	246.871	227.916	246.379	227.424	245.888	226.932	245.398	226.44	244.91	225.95	244.422	225.459	243.936	224.97	243.451	224.48
PtK_GFP-tub_mCh-p50	190624_002_04b_MAX17-32	262.75	248.25	263.426	248.89	264.103	249.53	264.78	250.171	265.456	250.811	266.133	251.452	266.81	252.093	267.487	252.734	268.163	253.375	268.841	254.017	269.518	254.66	270.195	255.303	270.873	255.946	271.55	256.591	272.228	257.236	272.906	257.881	273.584	258.528	274.263	259.175	274.941	259.823	275.62	260.473	276.299	261.123	276.979	261.774	277.659	262.426	278.339	263.08
PtK_GFP-tub_mCh-p50	190624_002_05a_MAX17-28	272.5	212.5	271.849	211.226	271.198	209.952	270.548	208.68	269.898	207.409	269.25	206.14	268.603	204.873	267.958	203.609	267.315	202.349	266.675	201.093	266.037	199.841	265.403	198.594	264.771	197.353	264.144	196.117	263.52	194.888	262.9	193.666	262.285	192.451	261.675	191.244	261.07	190.046	260.47	188.857	259.876	187.677	259.288	186.506	258.706	185.346	258.131	184.197
PtK_GFP-tub_mCh-p50	190624_002_05b_MAX14-20	282	236	282.436	236.56	282.871	237.12	283.307	237.679	283.743	238.239	284.178	238.799	284.614	239.358	285.05	239.917	285.486	240.476	285.922	241.035	286.358	241.593	286.795	242.152	287.231	242.709	287.668	243.267	288.105	243.824	288.542	244.38	288.98	244.936	289.418	245.492	289.856	246.047	290.294	246.601	290.732	247.155	291.171	247.708	291.61	248.261	292.05	248.812
PtK_GFP-tub_mCh-p50	190624_002_06a_MAX17-28	272	211.25	271.546	210.496	271.092	209.743	270.638	208.989	270.184	208.235	269.73	207.481	269.276	206.728	268.823	205.974	268.369	205.221	267.916	204.467	267.463	203.714	267.01	202.961	266.557	202.208	266.104	201.455	265.652	200.702	265.2	199.95	264.748	199.197	264.296	198.445	263.845	197.693	263.394	196.941	262.943	196.19	262.493	195.438	262.043	194.687	261.594	193.936
PtK_GFP-tub_mCh-p50	190624_002_06b_MAX13-20	287.333	235.167	287.676	235.918	288.019	236.669	288.362	237.421	288.707	238.172	289.052	238.923	289.399	239.673	289.747	240.424	290.097	241.175	290.449	241.925	290.804	242.675	291.161	243.424	291.522	244.173	291.885	244.922	292.253	245.671	292.623	246.419	292.998	247.166	293.378	247.913	293.762	248.66	294.15	249.405	294.544	250.151	294.943	250.895	295.348	251.639	295.759	252.382
PtK_GFP-tub_mCh-p50	190624_002_07a_MAX9-17	307.5	202.833	306.856	202.205	306.213	201.577	305.57	200.949	304.926	200.321	304.283	199.693	303.641	199.066	302.998	198.439	302.356	197.812	301.715	197.186	301.074	196.561	300.433	195.936	299.793	195.312	299.154	194.689	298.515	194.067	297.877	193.446	297.24	192.825	296.604	192.206	295.969	191.588	295.334	190.971	294.701	190.355	294.069	189.741	293.438	189.128	292.808	188.516
PtK_GFP-tub_mCh-p50	190624_002_07b_MAX9-15	322.5	221.167	323.077	221.848	323.657	222.536	324.242	223.234	324.834	223.95	325.435	224.687	326.049	225.453	326.676	226.252	327.321	227.091	327.985	227.974	328.67	228.908	329.379	229.898	330.115	230.949	330.88	232.067	331.675	233.258	332.505	234.528	333.37	235.881	334.273	237.325	335.218	238.863	336.205	240.502	337.238	242.247	338.319	244.105	339.451	246.08	340.634	248.176
PtK_GFP-tub_mCh-p50	190625_006_01a_MAX12-23	298.25	203.75	297.955	203.209	297.659	202.668	297.364	202.127	297.069	201.586	296.774	201.045	296.478	200.504	296.183	199.963	295.888	199.421	295.593	198.88	295.297	198.339	295.002	197.798	294.707	197.256	294.412	196.715	294.117	196.173	293.822	195.631	293.527	195.09	293.232	194.548	292.937	194.006	292.642	193.464	292.347	192.922	292.052	192.38	291.757	191.837	291.462	191.295
PtK_GFP-tub_mCh-p50	190625_006_01b_MAX5-14	308.667	221.333	308.912	221.934	309.157	222.534	309.401	223.135	309.646	223.736	309.891	224.338	310.135	224.941	310.379	225.544	310.623	226.149	310.866	226.755	311.109	227.362	311.351	227.97	311.593	228.581	311.835	229.193	312.076	229.807	312.316	230.423	312.555	231.042	312.794	231.663	313.032	232.287	313.269	232.913	313.506	233.542	313.741	234.175	313.976	234.81	314.209	235.449
PtK_GFP-tub_mCh-p50	190625_006_02a_MAX10-20	291	224.833	290.472	223.761	289.944	222.689	289.416	221.617	288.89	220.546	288.364	219.476	287.839	218.406	287.315	217.338	286.793	216.271	286.273	215.206	285.754	214.142	285.238	213.081	284.724	212.022	284.213	210.964	283.705	209.91	283.2	208.858	282.698	207.81	282.199	206.764	281.704	205.722	281.213	204.683	280.727	203.648	280.244	202.617	279.766	201.591	279.293	200.568
PtK_GFP-tub_mCh-p50	190625_006_02b_MAX5-12	296.667	237	296.845	237.893	297.023	238.785	297.202	239.678	297.38	240.572	297.56	241.465	297.739	242.36	297.92	243.255	298.101	244.15	298.282	245.047	298.465	245.945	298.649	246.844	298.833	247.744	299.019	248.645	299.206	249.548	299.395	250.452	299.585	251.359	299.777	252.267	299.97	253.176	300.165	254.088	300.362	255.002	300.561	255.918	300.762	256.837	300.965	257.758
PtK_GFP-tub_mCh-p50	190625_006_03a_MAX14-22	276.5	233.25	276.302	232.535	276.104	231.82	275.906	231.105	275.708	230.39	275.51	229.675	275.311	228.96	275.113	228.245	274.913	227.53	274.714	226.815	274.514	226.1	274.313	225.385	274.112	224.67	273.911	223.955	273.709	223.24	273.506	222.525	273.302	221.81	273.098	221.095	272.893	220.38	272.687	219.665	272.48	218.95	272.272	218.235	272.063	217.52	271.853	216.805
PtK_GFP-tub_mCh-p50	190625_006_03b_MAX8-15	282.167	254.167	282.255	254.693	282.343	255.22	282.432	255.746	282.52	256.273	282.609	256.8	282.699	257.328	282.788	257.857	282.879	258.386	282.97	258.916	283.062	259.446	283.155	259.978	283.249	260.511	283.344	261.045	283.44	261.58	283.537	262.117	283.635	262.655	283.735	263.195	283.837	263.736	283.939	264.279	284.044	264.824	284.15	265.371	284.258	265.92	284.368	266.471
PtK_GFP-tub_mCh-p50	190625_006_04a_MAX23-30	258.25	232.5	258.172	231.592	258.094	230.683	258.016	229.774	257.938	228.864	257.858	227.952	257.778	227.039	257.697	226.123	257.616	225.205	257.533	224.284	257.448	223.36	257.362	222.433	257.275	221.501	257.186	220.565	257.094	219.625	257.001	218.679	256.906	217.729	256.808	216.773	256.708	215.81	256.605	214.841	256.499	213.866	256.391	212.883	256.279	211.893	256.164	210.895
PtK_GFP-tub_mCh-p50	190625_006_04b_MAX26-29	262.75	246.5	262.876	247.304	263.003	248.109	263.131	248.915	263.26	249.724	263.39	250.536	263.523	251.352	263.659	252.173	263.797	252.999	263.939	253.832	264.085	254.672	264.236	255.519	264.391	256.376	264.551	257.243	264.717	258.119	264.89	259.007	265.068	259.907	265.254	260.82	265.447	261.746	265.648	262.687	265.858	263.642	266.076	264.614	266.303	265.603	266.54	266.609
PtK_GFP-tub_mCh-p50	190625_006_05a_MAX28-33	343.667	220.5	343.414	220.253	343.162	220.006	342.91	219.759	342.657	219.512	342.405	219.266	342.153	219.019	341.901	218.773	341.648	218.527	341.396	218.282	341.144	218.036	340.892	217.791	340.64	217.547	340.388	217.303	340.136	217.06	339.884	216.817	339.632	216.574	339.38	216.333	339.128	216.091	338.877	215.851	338.625	215.612	338.373	215.373	338.122	215.135	337.871	214.898
PtK_GFP-tub_mCh-p50	190625_006_05b_MAX24-30	354.333	227	354.642	227.366	354.951	227.731	355.26	228.097	355.569	228.462	355.878	228.828	356.187	229.193	356.496	229.558	356.804	229.923	357.113	230.287	357.421	230.652	357.729	231.016	358.037	231.379	358.344	231.743	358.652	232.106	358.959	232.468	359.266	232.83	359.572	233.192	359.878	233.553	360.184	233.913	360.49	234.273	360.795	234.633	361.1	234.991	361.404	235.349
PtK_GFP-tub_mCh-p50	190625_006_06a_MAX35-41	290.75	241	290.443	240.02	290.136	239.041	289.828	238.062	289.519	237.082	289.21	236.103	288.899	235.123	288.586	234.144	288.272	233.165	287.956	232.185	287.637	231.206	287.316	230.227	286.991	229.248	286.664	228.268	286.334	227.289	286	226.31	285.662	225.331	285.319	224.352	284.973	223.373	284.622	222.394	284.265	221.416	283.904	220.437	283.538	219.458	283.165	218.48
PtK_GFP-tub_mCh-p50	190625_006_06b_MAX36-42	293.25	255.75	293.255	256.155	293.26	256.56	293.265	256.965	293.27	257.372	293.276	257.779	293.282	258.187	293.288	258.597	293.295	259.009	293.302	259.422	293.31	259.838	293.318	260.256	293.327	260.677	293.337	261.101	293.348	261.527	293.359	261.958	293.372	262.392	293.385	262.83	293.4	263.272	293.416	263.718	293.432	264.169	293.45	264.625	293.47	265.086	293.491	265.553
PtK_GFP-tub_mCh-p50	190625_006_07a_MAX37-41	269.5	233.333	269.308	232.578	269.116	231.822	268.923	231.067	268.729	230.313	268.535	229.559	268.34	228.806	268.144	228.054	267.946	227.303	267.747	226.554	267.546	225.806	267.342	225.06	267.137	224.315	266.929	223.573	266.719	222.833	266.505	222.096	266.289	221.361	266.069	220.629	265.846	219.899	265.62	219.173	265.389	218.451	265.154	217.731	264.916	217.015	264.673	216.303
PtK_GFP-tub_mCh-p50	190625_006_07b_MAX37-43	273.167	250.833	273.149	251.459	273.132	252.085	273.114	252.712	273.098	253.338	273.082	253.965	273.067	254.592	273.054	255.219	273.041	255.847	273.031	256.475	273.022	257.104	273.015	257.733	273.01	258.363	273.007	258.994	273.007	259.626	273.009	260.258	273.015	260.891	273.023	261.526	273.035	262.161	273.05	262.797	273.069	263.435	273.092	264.074	273.118	264.714	273.149	265.355
PtK_GFP-tub_mCh-p50	190625_006_08a_MAX37-44	241.75	240.75	241.681	239.828	241.613	238.905	241.544	237.984	241.476	237.062	241.407	236.141	241.339	235.221	241.27	234.303	241.202	233.385	241.133	232.468	241.064	231.553	240.995	230.64	240.927	229.728	240.858	228.819	240.789	227.911	240.72	227.006	240.651	226.104	240.581	225.204	240.512	224.306	240.443	223.412	240.373	222.521	240.304	221.633	240.234	220.749	240.164	219.868
PtK_GFP-tub_mCh-p50	190625_006_08b_MAX37-43	239.333	255.833	239.475	256.384	239.617	256.934	239.758	257.485	239.898	258.035	240.038	258.585	240.177	259.135	240.314	259.685	240.451	260.234	240.586	260.783	240.719	261.332	240.85	261.881	240.979	262.429	241.106	262.977	241.23	263.524	241.352	264.07	241.47	264.617	241.586	265.162	241.699	265.707	241.808	266.252	241.913	266.795	242.015	267.338	242.112	267.881	242.206	268.422
PtK_GFP-tub_mCh-p50	190703_012_01a_MAX21-27	211.5	274.75	211.173	274.117	210.846	273.484	210.519	272.851	210.193	272.218	209.866	271.585	209.541	270.951	209.216	270.317	208.892	269.683	208.568	269.049	208.245	268.414	207.924	267.779	207.603	267.144	207.284	266.508	206.966	265.871	206.65	265.234	206.335	264.596	206.021	263.958	205.709	263.318	205.399	262.679	205.092	262.038	204.786	261.397	204.482	260.754	204.18	260.111
PtK_GFP-tub_mCh-p50	190703_012_01b_MAX14-22	221	301.5	221.163	302.437	221.327	303.373	221.493	304.309	221.659	305.243	221.828	306.176	221.999	307.107	222.173	308.035	222.351	308.96	222.533	309.882	222.72	310.8	222.912	311.713	223.109	312.622	223.313	313.526	223.524	314.424	223.741	315.317	223.966	316.203	224.2	317.082	224.442	317.954	224.694	318.818	224.955	319.675	225.227	320.522	225.51	321.361	225.804	322.191
PtK_GFP-tub_mCh-p50	190703_012_02a_MAX29-37	231.5	257.833	230.784	256.81	230.068	255.787	229.353	254.764	228.638	253.742	227.925	252.72	227.212	251.699	226.501	250.678	225.792	249.659	225.085	248.641	224.38	247.625	223.678	246.609	222.978	245.596	222.281	244.584	221.587	243.574	220.897	242.566	220.211	241.56	219.528	240.557	218.85	239.556	218.176	238.558	217.506	237.563	216.842	236.571	216.183	235.581	215.529	234.595
PtK_GFP-tub_mCh-p50	190703_012_02b_MAX22-29	244.5	278.75	244.962	279.643	245.424	280.536	245.887	281.428	246.351	282.32	246.816	283.211	247.283	284.101	247.751	284.989	248.222	285.876	248.695	286.761	249.17	287.644	249.649	288.525	250.131	289.403	250.616	290.279	251.105	291.152	251.599	292.022	252.097	292.888	252.6	293.751	253.108	294.611	253.621	295.466	254.141	296.317	254.666	297.164	255.197	298.006	255.735	298.843
PtK_GFP-tub_mCh-p50	190703_012_03a_MAX27-38	246.667	238.833	246.48	238.589	246.293	238.345	246.106	238.101	245.919	237.857	245.732	237.612	245.546	237.366	245.359	237.12	245.173	236.874	244.986	236.626	244.8	236.377	244.614	236.128	244.428	235.877	244.242	235.625	244.056	235.372	243.871	235.117	243.686	234.861	243.501	234.603	243.316	234.343	243.131	234.081	242.947	233.818	242.763	233.552	242.579	233.284	242.396	233.014
PtK_GFP-tub_mCh-p50	190703_012_03b_MAX27-34	278	264.5	278.219	265.23	278.438	265.96	278.658	266.69	278.879	267.42	279.102	268.15	279.328	268.879	279.556	269.608	279.787	270.337	280.022	271.065	280.262	271.792	280.505	272.519	280.754	273.246	281.009	273.972	281.269	274.697	281.536	275.422	281.809	276.145	282.09	276.868	282.379	277.59	282.676	278.311	282.982	279.031	283.296	279.749	283.621	280.467	283.956	281.183
PtK_GFP-tub_mCh-p50	190703_012_04a_MAX22-26	265.5	213.75	265.089	213.055	264.678	212.361	264.267	211.666	263.855	210.972	263.442	210.28	263.029	209.588	262.615	208.897	262.2	208.207	261.783	207.519	261.366	206.833	260.946	206.148	260.525	205.466	260.103	204.786	259.678	204.108	259.251	203.434	258.822	202.761	258.39	202.092	257.956	201.427	257.519	200.764	257.079	200.105	256.636	199.45	256.19	198.799	255.741	198.153
PtK_GFP-tub_mCh-p50	190703_012_04b_MAX14-22	274.833	212.5	274.933	212.948	275.032	213.396	275.132	213.844	275.233	214.293	275.333	214.742	275.435	215.192	275.537	215.643	275.64	216.095	275.744	216.549	275.85	217.003	275.956	217.459	276.065	217.917	276.174	218.377	276.286	218.838	276.399	219.302	276.514	219.768	276.631	220.236	276.751	220.707	276.873	221.181	276.997	221.657	277.124	222.137	277.254	222.619	277.386	223.105
PtK_GFP-tub_mCh-p50	190703_012_05a_MAX10-18	288.25	208.75	287.691	208.302	287.131	207.853	286.572	207.405	286.012	206.956	285.453	206.507	284.894	206.059	284.335	205.61	283.776	205.161	283.218	204.712	282.66	204.263	282.102	203.814	281.544	203.365	280.986	202.915	280.429	202.465	279.872	202.016	279.316	201.566	278.76	201.115	278.204	200.665	277.649	200.214	277.095	199.763	276.541	199.312	275.987	198.861	275.434	198.409
PtK_GFP-tub_mCh-p50	190703_012_05b_MAX4-11	301.25	221.875	301.452	222.123	301.654	222.371	301.856	222.619	302.057	222.867	302.259	223.116	302.461	223.364	302.662	223.612	302.863	223.861	303.065	224.11	303.265	224.358	303.466	224.607	303.667	224.857	303.867	225.106	304.067	225.356	304.267	225.606	304.467	225.856	304.666	226.107	304.865	226.357	305.063	226.609	305.261	226.86	305.459	227.112	305.656	227.364	305.853	227.617
PtK_GFP-tub_mCh-p50	190703_012_06a_MAX27-37	305.833	180.333	305.361	179.712	304.888	179.091	304.415	178.469	303.943	177.847	303.47	177.226	302.998	176.604	302.526	175.981	302.055	175.358	301.584	174.735	301.113	174.111	300.643	173.487	300.174	172.862	299.705	172.237	299.237	171.611	298.769	170.984	298.302	170.356	297.836	169.728	297.371	169.098	296.907	168.468	296.443	167.837	295.981	167.204	295.52	166.571	295.06	165.936
PtK_GFP-tub_mCh-p50	190703_012_06b_MAX23-30	315	197.667	315.307	198.211	315.615	198.755	315.922	199.299	316.23	199.843	316.538	200.386	316.847	200.929	317.156	201.471	317.466	202.012	317.777	202.552	318.089	203.091	318.401	203.629	318.715	204.166	319.03	204.701	319.347	205.235	319.664	205.767	319.984	206.297	320.305	206.825	320.627	207.352	320.952	207.876	321.278	208.398	321.607	208.917	321.937	209.434	322.27	209.949
PtK_GFP-tub_mCh-p50	190703_012_07a_MAX28-39	317.25	175	316.732	174.192	316.214	173.383	315.696	172.575	315.178	171.767	314.66	170.959	314.141	170.152	313.622	169.346	313.103	168.54	312.583	167.734	312.063	166.929	311.542	166.125	311.02	165.323	310.498	164.521	309.976	163.72	309.452	162.92	308.928	162.122	308.402	161.325	307.876	160.529	307.349	159.735	306.821	158.942	306.291	158.151	305.761	157.362	305.229	156.575
PtK_GFP-tub_mCh-p50	190703_012_07b_MAX19-31	326.75	192	327.298	192.683	327.846	193.366	328.394	194.049	328.942	194.732	329.488	195.415	330.034	196.099	330.579	196.784	331.123	197.469	331.665	198.155	332.206	198.841	332.746	199.528	333.284	200.216	333.82	200.906	334.353	201.596	334.885	202.287	335.414	202.98	335.94	203.674	336.464	204.369	336.985	205.066	337.503	205.764	338.018	206.464	338.529	207.166	339.037	207.87
PtK_GFP-tub_mCh-p50	190703_012_08a_MAX19-24	336.5	139.5	336.069	139.158	335.654	138.801	335.269	138.415	334.93	137.983	334.65	137.494	334.422	136.954	334.226	136.38	334.041	135.791	333.848	135.206	333.628	134.643	333.389	134.12	333.142	133.653	332.898	133.26	332.67	132.951	332.454	132.67	332.243	132.325	332.029	131.831	331.808	131.186	331.581	130.447	331.348	129.672	331.11	128.921	330.868	128.25	330.621	127.706
PtK_GFP-tub_mCh-p50	190703_012_08b_MAX20-25	342.5	159.5	342.792	160.056	343.084	160.613	343.376	161.169	343.667	161.726	343.958	162.282	344.248	162.84	344.536	163.397	344.824	163.955	345.11	164.513	345.395	165.071	345.678	165.631	345.959	166.19	346.239	166.751	346.516	167.312	346.791	167.873	347.063	168.436	347.332	168.999	347.599	169.563	347.863	170.128	348.124	170.695	348.381	171.262	348.635	171.83	348.885	172.399
PtK_GFP-tub_mCh-p50	190703_014_01a_MAX15-22	220.167	208.833	219.841	209.17	219.515	209.507	219.189	209.844	218.863	210.18	218.537	210.518	218.211	210.855	217.885	211.192	217.559	211.53	217.233	211.868	216.907	212.206	216.582	212.544	216.256	212.883	215.93	213.222	215.604	213.562	215.279	213.902	214.953	214.243	214.628	214.584	214.302	214.926	213.977	215.268	213.652	215.611	213.327	215.954	213.001	216.298	212.676	216.643
PtK_GFP-tub_mCh-p50	190703_014_01b_MAX13-18	241	185.25	241.814	184.444	242.627	183.639	243.441	182.834	244.256	182.03	245.071	181.228	245.887	180.427	246.705	179.628	247.523	178.831	248.343	178.037	249.165	177.245	249.989	176.457	250.814	175.672	251.642	174.891	252.472	174.114	253.305	173.342	254.141	172.574	254.98	171.811	255.821	171.054	256.666	170.302	257.515	169.556	258.367	168.816	259.224	168.083	260.084	167.358
PtK_GFP-tub_mCh-p50	190703_014_02a_MAX15-21	227.333	228.333	226.83	228.749	226.327	229.165	225.824	229.581	225.321	229.997	224.82	230.414	224.319	230.832	223.82	231.25	223.321	231.669	222.825	232.089	222.33	232.51	221.837	232.933	221.346	233.357	220.858	233.782	220.372	234.209	219.888	234.637	219.408	235.068	218.931	235.5	218.457	235.935	217.986	236.372	217.519	236.811	217.056	237.253	216.597	237.697	216.142	238.144
PtK_GFP-tub_mCh-p50	190703_014_02b_MAX10-17	255	199.5	255.631	198.844	256.261	198.188	256.892	197.532	257.524	196.876	258.155	196.221	258.788	195.566	259.421	194.911	260.055	194.257	260.689	193.604	261.325	192.951	261.962	192.299	262.601	191.648	263.24	190.998	263.882	190.348	264.525	189.7	265.169	189.053	265.816	188.407	266.464	187.763	267.115	187.12	267.768	186.478	268.423	185.838	269.081	185.199	269.741	184.562
PtK_GFP-tub_mCh-p50	190703_014_03a_MAX16-24	237.25	252.25	236.463	252.964	235.677	253.678	234.89	254.391	234.105	255.106	233.319	255.82	232.535	256.535	231.751	257.25	230.968	257.966	230.187	258.682	229.407	259.399	228.628	260.116	227.851	260.834	227.075	261.553	226.302	262.274	225.53	262.995	224.761	263.716	223.994	264.44	223.229	265.164	222.468	265.889	221.708	266.616	220.952	267.345	220.199	268.074	219.449	268.805
PtK_GFP-tub_mCh-p50	190703_014_03b_MAX14-17	262	226	263.276	225.549	264.541	225.078	265.783	224.57	266.991	224.005	268.153	223.371	269.255	222.695	270.281	222.008	271.217	221.343	272.063	220.71	272.851	220.074	273.616	219.392	274.385	218.644	275.157	217.858	275.927	217.074	276.692	216.318	277.457	215.567	278.231	214.784	279.019	213.931	279.796	213.029	280.518	212.136	281.141	211.306	281.67	210.562	282.205	209.851
PtK_GFP-tub_mCh-p50	190703_014_04a_MAX16-25	259.833	261.167	259.237	262.026	258.641	262.885	258.046	263.743	257.451	264.601	256.857	265.456	256.264	266.31	255.672	267.162	255.082	268.012	254.493	268.858	253.907	269.701	253.322	270.541	252.74	271.377	252.16	272.208	251.584	273.035	251.01	273.857	250.439	274.673	249.872	275.484	249.308	276.289	248.749	277.087	248.193	277.878	247.642	278.663	247.095	279.439	246.552	280.208
PtK_GFP-tub_mCh-p50	190703_014_04b_MAX13-17	280.833	250.167	281.514	249.479	282.195	248.792	282.875	248.104	283.556	247.417	284.236	246.729	284.915	246.041	285.594	245.352	286.272	244.664	286.949	243.975	287.626	243.285	288.301	242.596	288.976	241.905	289.649	241.215	290.321	240.523	290.991	239.831	291.661	239.139	292.328	238.446	292.994	237.752	293.659	237.057	294.321	236.361	294.982	235.665	295.64	234.968	296.296	234.269
PtK_GFP-tub_mCh-p50	210519_002_01a_MAX5-9	219.167	272.5	218.342	273.162	217.594	273.842	216.998	274.559	216.617	275.326	216.336	276.091	215.914	276.757	215.164	277.254	214.238	277.685	213.414	278.211	212.954	278.986	212.813	279.966	212.702	280.947	212.33	281.726	211.607	282.25	210.762	282.708	210.048	283.305	209.599	284.147	209.277	285.109	208.908	286.034	208.348	286.791	207.661	287.414	206.993	288	206.473	288.638
PtK_GFP-tub_mCh-p50	210519_002_01b_MAX5-7	248.833	246.5	249.376	245.98	249.919	245.46	250.462	244.94	251.005	244.421	251.548	243.901	252.09	243.382	252.632	242.863	253.174	242.345	253.715	241.827	254.256	241.309	254.796	240.792	255.336	240.276	255.876	239.761	256.414	239.246	256.952	238.732	257.49	238.219	258.026	237.706	258.562	237.195	259.097	236.685	259.631	236.175	260.164	235.667	260.696	235.161	261.227	234.655
PtK_GFP-tub_mCh-p50	210519_002_02a_MAX7-10	233.5	293.833	233.031	294.403	232.572	294.957	232.134	295.48	231.727	295.957	231.341	296.387	230.932	296.794	230.45	297.207	229.871	297.647	229.249	298.122	228.653	298.635	228.148	299.191	227.773	299.785	227.451	300.375	227.085	300.913	226.579	301.354	225.933	301.701	225.256	302.017	224.66	302.366	224.248	302.807	223.974	303.329	223.702	303.874	223.295	304.388	222.716	304.855
PtK_GFP-tub_mCh-p50	210519_002_02b_MAX8-9	257.667	274.833	257.984	274.549	258.3	274.264	258.617	273.98	258.934	273.696	259.25	273.413	259.566	273.13	259.882	272.848	260.197	272.566	260.512	272.286	260.826	272.006	261.14	271.728	261.453	271.451	261.765	271.175	262.077	270.901	262.388	270.629	262.698	270.358	263.007	270.089	263.315	269.822	263.622	269.557	263.927	269.294	264.232	269.034	264.535	268.776	264.837	268.52
PtK_GFP-tub_mCh-p50	210519_002_03a_MAX9-13	243.333	298.5	242.675	298.987	242.016	299.474	241.358	299.961	240.7	300.449	240.042	300.936	239.385	301.424	238.729	301.913	238.074	302.401	237.419	302.891	236.766	303.381	236.113	303.872	235.462	304.363	234.813	304.855	234.165	305.349	233.518	305.843	232.873	306.338	232.23	306.834	231.589	307.332	230.95	307.83	230.313	308.33	229.679	308.832	229.047	309.335	228.417	309.839
PtK_GFP-tub_mCh-p50	210519_002_03b_MAX9-13	267.5	278.667	268.154	277.988	268.807	277.31	269.46	276.632	270.113	275.955	270.765	275.278	271.416	274.602	272.067	273.927	272.716	273.253	273.365	272.581	274.011	271.91	274.657	271.24	275.3	270.573	275.942	269.907	276.582	269.244	277.219	268.583	277.855	267.924	278.488	267.268	279.118	266.615	279.746	265.965	280.371	265.318	280.992	264.674	281.611	264.034	282.226	263.398
PtK_GFP-tub_mCh-p50	210519_002_04a_MAX8-11	238	316.75	237.44	317.183	236.88	317.615	236.32	318.048	235.76	318.48	235.2	318.912	234.641	319.344	234.082	319.776	233.524	320.208	232.965	320.639	232.408	321.07	231.851	321.5	231.294	321.93	230.739	322.36	230.184	322.789	229.629	323.218	229.076	323.646	228.523	324.073	227.972	324.5	227.421	324.925	226.872	325.351	226.323	325.775	225.776	326.198	225.23	326.621
PtK_GFP-tub_mCh-p50	210519_002_04b_MAX10-14	262.667	294.667	263.462	293.865	264.258	293.065	265.053	292.265	265.847	291.466	266.64	290.668	267.433	289.873	268.224	289.079	269.014	288.288	269.802	287.5	270.588	286.715	271.372	285.934	272.154	285.157	272.933	284.384	273.709	283.616	274.483	282.853	275.253	282.095	276.021	281.343	276.784	280.598	277.544	279.859	278.3	279.126	279.052	278.401	279.799	277.684	280.542	276.975
PtK_GFP-tub_mCh-p50	210519_002_05a_MAX8-12	259	324.5	258.479	325.085	257.945	325.651	257.387	326.181	256.791	326.655	256.154	327.074	255.478	327.463	254.77	327.851	254.037	328.264	253.299	328.705	252.587	329.16	251.93	329.616	251.356	330.06	250.84	330.5	250.328	330.958	249.767	331.454	249.14	331.985	248.478	332.52	247.816	333.024	247.186	333.464	246.59	333.843	246.003	334.197	245.396	334.564	244.75	334.965
PtK_GFP-tub_mCh-p50	210519_002_05b_MAX10-16	278.25	309.25	278.971	308.254	279.692	307.258	280.414	306.261	281.135	305.263	281.856	304.265	282.578	303.265	283.3	302.264	284.022	301.261	284.744	300.256	285.466	299.248	286.189	298.239	286.911	297.226	287.635	296.211	288.358	295.192	289.082	294.17	289.806	293.144	290.531	292.115	291.256	291.08	291.981	290.042	292.707	288.999	293.433	287.951	294.16	286.897	294.888	285.839
PtK_GFP-tub_mCh-p50	210519_002_06a_MAX14-18	218	269.25	217.557	269.841	217.113	270.432	216.67	271.023	216.228	271.615	215.785	272.207	215.344	272.8	214.903	273.394	214.463	273.988	214.024	274.584	213.587	275.181	213.15	275.779	212.715	276.379	212.281	276.98	211.849	277.583	211.419	278.187	210.991	278.794	210.565	279.403	210.14	280.014	209.719	280.627	209.299	281.243	208.882	281.861	208.468	282.482	208.056	283.106
PtK_GFP-tub_mCh-p50	210519_002_06b_MAX13-17	228.5	242.5	229.009	242.053	229.518	241.606	230.028	241.16	230.537	240.713	231.047	240.267	231.556	239.82	232.066	239.374	232.576	238.929	233.086	238.483	233.597	238.038	234.108	237.594	234.619	237.15	235.13	236.706	235.642	236.263	236.154	235.82	236.666	235.378	237.179	234.937	237.692	234.497	238.206	234.057	238.721	233.618	239.236	233.179	239.751	232.742	240.267	232.306
PtK_GFP-tub_mCh-p50	210519_002_07a_MAX15-19	244.75	262.25	244.228	263.168	243.706	264.086	243.183	265.004	242.658	265.923	242.131	266.842	241.601	267.762	241.068	268.683	240.53	269.604	239.989	270.527	239.442	271.451	238.89	272.375	238.332	273.302	237.767	274.23	237.195	275.16	236.615	276.091	236.026	277.024	235.429	277.96	234.822	278.897	234.206	279.837	233.579	280.78	232.94	281.725	232.29	282.673	231.628	283.623
PtK_GFP-tub_mCh-p50	210519_002_07b_MAX14-18	266.25	243.25	266.657	242.827	267.065	242.405	267.473	241.983	267.881	241.561	268.289	241.139	268.698	240.717	269.108	240.295	269.518	239.874	269.929	239.453	270.341	239.033	270.754	238.613	271.169	238.194	271.584	237.775	272.001	237.357	272.419	236.939	272.839	236.522	273.26	236.106	273.683	235.69	274.109	235.276	274.536	234.862	274.965	234.449	275.396	234.037	275.829	233.627
PtK_GFP-tub_mCh-p50	210519_005_01a_MAX30-33	251.167	197.167	250.687	197.153	250.207	197.139	249.727	197.125	249.248	197.111	248.768	197.098	248.289	197.085	247.81	197.073	247.332	197.06	246.854	197.049	246.377	197.038	245.9	197.028	245.423	197.018	244.948	197.01	244.473	197.002	243.999	196.995	243.525	196.989	243.053	196.985	242.581	196.981	242.11	196.979	241.64	196.978	241.172	196.978	240.704	196.98	240.238	196.983
PtK_GFP-tub_mCh-p50	210519_005_01b_MAX28-32	270.333	196.5	270.755	196.172	271.178	195.843	271.6	195.515	272.023	195.188	272.445	194.861	272.869	194.534	273.292	194.208	273.717	193.884	274.141	193.56	274.567	193.238	274.993	192.916	275.42	192.597	275.848	192.279	276.277	191.962	276.707	191.648	277.138	191.335	277.571	191.024	278.004	190.716	278.439	190.41	278.876	190.107	279.313	189.806	279.753	189.508	280.194	189.213
PtK_GFP-tub_mCh-p50	210519_005_02a_MAX11-17	237	234.333	236.454	234.428	235.907	234.523	235.36	234.618	234.813	234.713	234.265	234.809	233.717	234.906	233.167	235.003	232.617	235.101	232.065	235.201	231.512	235.302	230.958	235.404	230.402	235.508	229.844	235.613	229.285	235.72	228.723	235.83	228.159	235.941	227.593	236.054	227.024	236.17	226.452	236.288	225.878	236.409	225.301	236.533	224.721	236.66	224.138	236.789
PtK_GFP-tub_mCh-p50	210519_005_02b_MAX14-18	253	229.667	253.459	229.437	253.919	229.208	254.379	228.978	254.838	228.748	255.299	228.518	255.759	228.288	256.22	228.058	256.682	227.828	257.144	227.597	257.607	227.365	258.07	227.134	258.534	226.902	259	226.669	259.466	226.436	259.933	226.203	260.402	225.969	260.872	225.734	261.343	225.498	261.815	225.262	262.289	225.025	262.764	224.787	263.241	224.549	263.719	224.31
PtK_GFP-tub_mCh-p50	210519_005_03a_MAX15-17	244.833	252.167	244.321	252.214	243.808	252.261	243.293	252.309	242.778	252.356	242.26	252.403	241.74	252.451	241.218	252.498	240.691	252.546	240.161	252.593	239.627	252.641	239.088	252.689	238.543	252.737	237.993	252.784	237.436	252.833	236.873	252.881	236.302	252.929	235.724	252.977	235.137	253.026	234.542	253.075	233.937	253.123	233.323	253.172	232.698	253.222	232.063	253.271
PtK_GFP-tub_mCh-p50	210519_005_03b_MAX16-21	260	251.25	260.591	250.918	261.183	250.586	261.776	250.255	262.37	249.926	262.967	249.599	263.566	249.274	264.169	248.953	264.776	248.635	265.387	248.321	266.003	248.011	266.625	247.706	267.252	247.407	267.887	247.115	268.529	246.828	269.178	246.549	269.836	246.277	270.503	246.014	271.179	245.759	271.865	245.513	272.562	245.276	273.27	245.05	273.99	244.834	274.722	244.63
PtK_GFP-tub_mCh-p50	210519_005_04a_MAX28-32	256.75	258	256.02	257.92	255.29	257.841	254.56	257.763	253.831	257.686	253.103	257.611	252.376	257.538	251.649	257.467	250.924	257.399	250.201	257.335	249.479	257.275	248.759	257.219	248.041	257.168	247.325	257.122	246.612	257.082	245.901	257.048	245.193	257.02	244.488	256.999	243.786	256.985	243.087	256.979	242.392	256.981	241.7	256.992	241.013	257.012	240.329	257.042
PtK_GFP-tub_mCh-p50	210519_005_04b_MAX27-32	272.5	257.5	273.144	257.702	273.788	257.903	274.433	258.104	275.077	258.303	275.721	258.5	276.366	258.696	277.011	258.888	277.656	259.078	278.301	259.264	278.946	259.446	279.592	259.623	280.238	259.796	280.885	259.963	281.532	260.125	282.18	260.28	282.828	260.429	283.476	260.57	284.125	260.705	284.775	260.831	285.425	260.949	286.076	261.057	286.727	261.157	287.38	261.247
PtK_GFP-tub_mCh-p50	210519_005_05a_MAX12-16	205.25	318.5	204.788	319.173	204.326	319.845	203.864	320.519	203.402	321.193	202.941	321.868	202.479	322.544	202.018	323.223	201.556	323.902	201.095	324.584	200.635	325.269	200.174	325.956	199.714	326.646	199.254	327.339	198.794	328.036	198.335	328.736	197.876	329.44	197.417	330.148	196.959	330.861	196.502	331.579	196.045	332.302	195.588	333.03	195.132	333.763	194.677	334.502
PtK_GFP-tub_mCh-p50	210519_005_05b_MAX11-14	218.167	304.667	218.529	304.295	218.891	303.923	219.253	303.55	219.616	303.178	219.979	302.804	220.344	302.43	220.709	302.054	221.075	301.678	221.443	301.3	221.812	300.921	222.183	300.54	222.556	300.158	222.931	299.773	223.308	299.387	223.687	298.998	224.068	298.606	224.452	298.213	224.839	297.816	225.229	297.416	225.622	297.014	226.018	296.608	226.418	296.199	226.822	295.786
PtK_GFP-tub_mCh-p50	210519_010_01a_MAX7-13	226	343	225.283	343.198	224.567	343.396	223.85	343.593	223.134	343.789	222.418	343.984	221.703	344.178	220.989	344.369	220.276	344.559	219.563	344.746	218.851	344.93	218.141	345.112	217.432	345.29	216.724	345.464	216.018	345.634	215.314	345.8	214.611	345.962	213.91	346.118	213.211	346.27	212.514	346.416	211.819	346.556	211.127	346.69	210.437	346.818	209.749	346.939
PtK_GFP-tub_mCh-p50	210519_010_01b_MAX6-10	247.5	335.167	248.188	334.908	248.875	334.649	249.563	334.389	250.251	334.128	250.94	333.866	251.629	333.602	252.319	333.336	253.009	333.068	253.7	332.798	254.392	332.524	255.085	332.248	255.779	331.967	256.474	331.683	257.171	331.394	257.868	331.101	258.567	330.803	259.268	330.5	259.971	330.192	260.675	329.877	261.381	329.556	262.089	329.229	262.798	328.895	263.51	328.554
PtK_GFP-tub_mCh-p50	210519_010_02a_MAX15-20	219.75	319.75	218.923	319.924	218.097	320.099	217.27	320.273	216.444	320.447	215.617	320.62	214.79	320.793	213.963	320.966	213.135	321.138	212.307	321.309	211.479	321.48	210.651	321.649	209.822	321.818	208.993	321.986	208.163	322.153	207.332	322.319	206.502	322.483	205.67	322.646	204.838	322.808	204.005	322.968	203.172	323.127	202.338	323.283	201.503	323.439	200.667	323.592
PtK_GFP-tub_mCh-p50	210519_010_02b_MAX13-17	269.25	316.25	269.645	316.119	270.04	315.988	270.436	315.856	270.834	315.724	271.233	315.591	271.635	315.456	272.039	315.321	272.446	315.184	272.854	315.046	273.259	314.907	273.656	314.768	274.04	314.628	274.408	314.49	274.755	314.353	275.076	314.217	275.371	314.082	275.647	313.948	275.912	313.813	276.172	313.675	276.437	313.533	276.714	313.386	277.005	313.234	277.309	313.078
PtK_GFP-tub_mCh-p50	210519_010_03a_MAX16-19	220.333	318.667	219.862	318.938	219.391	319.209	218.919	319.48	218.447	319.75	217.975	320.02	217.501	320.289	217.027	320.556	216.551	320.822	216.074	321.087	215.596	321.35	215.116	321.611	214.634	321.87	214.151	322.127	213.665	322.381	213.177	322.633	212.687	322.882	212.194	323.128	211.699	323.371	211.2	323.61	210.699	323.846	210.194	324.078	209.686	324.306	209.175	324.53
PtK_GFP-tub_mCh-p50	210519_010_03b_MAX15-18	239.667	310.5	240.247	310.186	240.828	309.873	241.409	309.559	241.99	309.245	242.572	308.932	243.154	308.618	243.737	308.305	244.32	307.991	244.905	307.678	245.49	307.364	246.076	307.051	246.663	306.738	247.252	306.425	247.841	306.112	248.432	305.799	249.025	305.486	249.619	305.173	250.215	304.861	250.813	304.549	251.412	304.236	252.014	303.924	252.617	303.613	253.223	303.301
PtK_GFP-tub_mCh-p50	210519_010_04a_MAX10-16	207.167	285.667	206.409	286.111	205.652	286.556	204.895	287	204.139	287.443	203.383	287.886	202.627	288.327	201.873	288.766	201.12	289.204	200.367	289.639	199.616	290.072	198.867	290.503	198.119	290.93	197.372	291.355	196.628	291.776	195.885	292.194	195.144	292.608	194.406	293.017	193.67	293.422	192.937	293.823	192.206	294.218	191.478	294.608	190.753	294.993	190.031	295.373
PtK_GFP-tub_mCh-p50	210519_010_04b_MAX12-16	238.5	272.25	239.198	272.055	239.896	271.861	240.595	271.666	241.293	271.471	241.991	271.275	242.69	271.079	243.388	270.882	244.087	270.685	244.786	270.487	245.485	270.288	246.185	270.088	246.885	269.887	247.585	269.685	248.285	269.481	248.986	269.277	249.687	269.071	250.388	268.863	251.09	268.654	251.792	268.442	252.495	268.23	253.198	268.015	253.901	267.798	254.606	267.579
PtK_GFP-tub_mCh-p50	210520_001_01a_MAX11-15	202.833	230	202.292	230.107	201.75	230.214	201.208	230.322	200.666	230.431	200.124	230.543	199.581	230.657	199.037	230.774	198.493	230.895	197.948	231.02	197.403	231.15	196.856	231.285	196.308	231.425	195.76	231.571	195.21	231.725	194.659	231.885	194.107	232.053	193.553	232.229	192.998	232.414	192.44	232.608	191.882	232.812	191.321	233.026	190.759	233.251	190.195	233.487
PtK_GFP-tub_mCh-p50	210520_001_01b_MAX14-17	218.75	224.75	219.29	224.554	219.83	224.357	220.37	224.16	220.911	223.964	221.452	223.767	221.993	223.571	222.535	223.375	223.077	223.178	223.621	222.982	224.165	222.785	224.71	222.589	225.256	222.392	225.803	222.196	226.352	222	226.901	221.803	227.452	221.607	228.005	221.411	228.559	221.214	229.115	221.018	229.673	220.822	230.232	220.626	230.794	220.43	231.357	220.234
PtK_GFP-tub_mCh-p50	210520_001_02a_MAX15-20	218.5	251.333	217.833	251.297	217.165	251.261	216.498	251.225	215.831	251.189	215.163	251.153	214.497	251.118	213.83	251.083	213.164	251.049	212.498	251.015	211.833	250.981	211.167	250.949	210.503	250.917	209.839	250.886	209.175	250.855	208.513	250.826	207.85	250.798	207.189	250.77	206.528	250.744	205.868	250.719	205.209	250.695	204.551	250.673	203.894	250.652	203.237	250.632
PtK_GFP-tub_mCh-p50	210520_001_02b_MAX17-21	238.667	242.167	239.279	241.788	239.891	241.409	240.503	241.031	241.117	240.653	241.73	240.276	242.345	239.9	242.961	239.525	243.578	239.151	244.197	238.779	244.818	238.408	245.44	238.039	246.065	237.673	246.691	237.308	247.32	236.946	247.952	236.587	248.587	236.23	249.225	235.876	249.866	235.526	250.51	235.179	251.158	234.835	251.81	234.495	252.465	234.159	253.125	233.827
PtK_GFP-tub_mCh-p50	210520_001_04a_MAX1-8	232	286.25	231.433	286.741	230.866	287.233	230.299	287.724	229.733	288.216	229.167	288.707	228.602	289.199	228.039	289.69	227.477	290.18	226.916	290.671	226.356	291.162	225.799	291.652	225.243	292.142	224.69	292.632	224.139	293.122	223.59	293.611	223.044	294.1	222.501	294.589	221.961	295.077	221.424	295.565	220.891	296.052	220.361	296.539	219.835	297.026	219.312	297.512
PtK_GFP-tub_mCh-p50	210520_001_04b_MAX3-11	255	271.75	255.502	271.27	256.003	270.791	256.505	270.312	257.006	269.834	257.507	269.356	258.009	268.879	258.509	268.403	259.01	267.929	259.51	267.456	260.01	266.985	260.51	266.515	261.009	266.048	261.507	265.583	262.005	265.121	262.503	264.661	263	264.203	263.496	263.749	263.992	263.298	264.487	262.85	264.981	262.406	265.474	261.966	265.967	261.529	266.459	261.097
PtK_GFP-tub_mCh-p50	210520_001_05a_MAX8-16	237.833	300.833	237.222	301.846	236.611	302.858	236	303.87	235.39	304.883	234.78	305.896	234.17	306.909	233.56	307.923	232.952	308.938	232.344	309.953	231.736	310.969	231.13	311.985	230.524	313.003	229.919	314.021	229.316	315.041	228.714	316.062	228.113	317.083	227.513	318.107	226.915	319.131	226.318	320.157	225.722	321.185	225.129	322.214	224.537	323.245	223.947	324.277
PtK_GFP-tub_mCh-p50	210520_001_05b_MAX16-23	259	286	259.379	285.47	259.758	284.94	260.137	284.41	260.517	283.88	260.897	283.351	261.277	282.822	261.659	282.294	262.041	281.766	262.424	281.24	262.808	280.714	263.194	280.189	263.581	279.665	263.969	279.143	264.359	278.622	264.75	278.102	265.144	277.583	265.539	277.066	265.936	276.551	266.336	276.038	266.738	275.526	267.142	275.017	267.549	274.509	267.958	274.004
PtK_GFP-tub_mCh-p50	210520_001_06a_MAX5-11	269.5	311.75	268.846	312.076	268.193	312.402	267.539	312.729	266.886	313.055	266.233	313.382	265.581	313.709	264.929	314.036	264.278	314.364	263.628	314.692	262.978	315.021	262.329	315.35	261.681	315.679	261.034	316.01	260.389	316.341	259.745	316.673	259.101	317.005	258.46	317.338	257.82	317.673	257.181	318.008	256.545	318.344	255.91	318.682	255.276	319.02	254.645	319.36
PtK_GFP-tub_mCh-p50	210520_001_06b_MAX11-19	281.167	297.667	281.479	297.24	281.791	296.813	282.104	296.386	282.416	295.959	282.728	295.533	283.041	295.106	283.353	294.679	283.665	294.253	283.977	293.826	284.289	293.399	284.601	292.973	284.913	292.546	285.224	292.12	285.536	291.694	285.848	291.267	286.159	290.841	286.47	290.415	286.781	289.989	287.092	289.563	287.403	289.137	287.713	288.711	288.023	288.286	288.334	287.86
PtK_GFP-tub_mCh-p50	210520_001_07a_MAX17-23	239.833	334.5	239.335	335.079	238.836	335.657	238.338	336.235	237.84	336.811	237.343	337.387	236.846	337.96	236.35	338.531	235.855	339.1	235.361	339.666	234.868	340.228	234.376	340.788	233.886	341.343	233.397	341.894	232.909	342.44	232.424	342.981	231.94	343.517	231.458	344.048	230.979	344.572	230.501	345.089	230.027	345.6	229.554	346.104	229.084	346.601	228.617	347.089
PtK_GFP-tub_mCh-p50	210520_001_07b_MAX21-27	255.667	322.833	256.185	322.489	256.702	322.145	257.22	321.801	257.737	321.456	258.254	321.111	258.77	320.765	259.286	320.418	259.801	320.071	260.315	319.723	260.828	319.374	261.341	319.024	261.852	318.673	262.362	318.32	262.871	317.966	263.378	317.61	263.884	317.252	264.389	316.893	264.891	316.532	265.392	316.169	265.891	315.804	266.388	315.436	266.883	315.067	267.376	314.695
PtK_GFP-tub_mCh-p50	210520_001_08a_MAX20-25	250.333	354.833	250.075	355.068	249.816	355.303	249.557	355.538	249.298	355.773	249.039	356.008	248.78	356.243	248.522	356.478	248.263	356.712	248.004	356.947	247.745	357.181	247.486	357.415	247.227	357.649	246.968	357.882	246.709	358.116	246.45	358.349	246.191	358.582	245.931	358.814	245.672	359.046	245.413	359.278	245.154	359.51	244.894	359.741	244.635	359.972	244.375	360.202
PtK_GFP-tub_mCh-p50	210520_001_08b_MAX21-17	263	344.5	263.684	343.642	264.368	342.784	265.05	341.927	265.732	341.07	266.413	340.216	267.092	339.363	267.769	338.512	268.443	337.663	269.115	336.817	269.783	335.975	270.449	335.136	271.11	334.3	271.768	333.469	272.421	332.643	273.069	331.821	273.712	331.004	274.35	330.193	274.982	329.388	275.608	328.589	276.227	327.797	276.84	327.012	277.445	326.234	278.043	325.464
PtK_GFP-tub_mCh-p50	210712_003_01a_MAX11-15	211.375	209	210.933	209.139	210.491	209.279	210.049	209.418	209.608	209.558	209.167	209.699	208.727	209.841	208.287	209.983	207.848	210.127	207.41	210.272	206.973	210.418	206.538	210.566	206.103	210.715	205.67	210.867	205.238	211.021	204.808	211.177	204.38	211.335	203.953	211.495	203.528	211.659	203.106	211.825	202.685	211.994	202.267	212.167	201.851	212.343	201.438	212.522
PtK_GFP-tub_mCh-p50	210712_003_01b_MAX8-13	222.667	203.167	222.896	202.936	223.126	202.705	223.356	202.474	223.585	202.243	223.815	202.012	224.045	201.781	224.275	201.55	224.505	201.319	224.735	201.088	224.965	200.857	225.195	200.626	225.426	200.396	225.656	200.165	225.887	199.934	226.118	199.702	226.349	199.471	226.581	199.24	226.812	199.009	227.044	198.778	227.276	198.547	227.509	198.316	227.742	198.085	227.975	197.854
PtK_GFP-tub_mCh-p50	210712_003_02a_MAX6-10	225.5	269.625	225.188	270.128	224.876	270.632	224.564	271.135	224.252	271.637	223.94	272.139	223.628	272.64	223.315	273.14	223.003	273.639	222.69	274.137	222.377	274.633	222.063	275.128	221.75	275.622	221.435	276.113	221.121	276.602	220.806	277.089	220.491	277.575	220.175	278.057	219.859	278.537	219.542	279.014	219.225	279.488	218.907	279.959	218.589	280.427	218.27	280.892
PtK_GFP-tub_mCh-p50	210712_003_02b_MAX7-17	236.75	259.75	237.151	259.016	237.552	258.282	237.955	257.548	238.359	256.816	238.766	256.085	239.175	255.356	239.588	254.629	240.005	253.904	240.427	253.181	240.853	252.462	241.286	251.746	241.725	251.034	242.171	250.326	242.624	249.623	243.086	248.924	243.556	248.23	244.036	247.541	244.525	246.858	245.024	246.182	245.535	245.512	246.057	244.848	246.592	244.191	247.139	243.542
PtK_GFP-tub_mCh-p50	210712_003_03a_MAX18-21	244.5	309.167	244.215	309.522	243.93	309.877	243.646	310.233	243.361	310.588	243.076	310.943	242.792	311.299	242.507	311.654	242.223	312.01	241.938	312.365	241.654	312.721	241.37	313.076	241.086	313.432	240.803	313.787	240.519	314.143	240.236	314.499	239.953	314.855	239.67	315.211	239.387	315.567	239.105	315.923	238.823	316.279	238.541	316.635	238.26	316.991	237.979	317.348
PtK_GFP-tub_mCh-p50	210712_003_03b_MAX11-18	253.833	293.5	254.103	293.053	254.373	292.605	254.643	292.158	254.912	291.711	255.182	291.265	255.451	290.818	255.719	290.372	255.987	289.927	256.255	289.482	256.522	289.038	256.789	288.594	257.054	288.152	257.319	287.71	257.584	287.269	257.847	286.829	258.109	286.39	258.371	285.952	258.631	285.515	258.89	285.079	259.148	284.645	259.405	284.213	259.661	283.781	259.915	283.351
PtK_GFP-tub_mCh-p50	210712_003_04a_MAX6-12	274	320.75	273.751	321.3	273.501	321.849	273.251	322.399	272.999	322.948	272.746	323.497	272.491	324.045	272.233	324.593	271.972	325.14	271.708	325.686	271.44	326.232	271.168	326.776	270.891	327.32	270.609	327.862	270.322	328.403	270.029	328.943	269.73	329.482	269.423	330.019	269.11	330.554	268.79	331.088	268.461	331.62	268.124	332.15	267.778	332.678	267.423	333.205
PtK_GFP-tub_mCh-p50	210712_003_04b_MAX7-11	280.75	306.875	280.938	306.598	281.126	306.321	281.314	306.044	281.503	305.767	281.692	305.489	281.881	305.212	282.07	304.934	282.261	304.655	282.451	304.376	282.643	304.097	282.835	303.817	283.028	303.536	283.222	303.255	283.417	302.973	283.613	302.691	283.81	302.407	284.008	302.123	284.207	301.837	284.408	301.551	284.61	301.264	284.814	300.975	285.02	300.686	285.227	300.395
PtK_GFP-tub_mCh-p50	210712_003_05a_MAX10-16	297.627	323.088	297.192	323.318	296.757	323.549	296.323	323.78	295.889	324.012	295.455	324.245	295.022	324.48	294.588	324.715	294.156	324.953	293.724	325.192	293.293	325.434	292.863	325.678	292.433	325.925	292.005	326.174	291.577	326.427	291.15	326.683	290.725	326.943	290.301	327.207	289.878	327.475	289.457	327.748	289.037	328.025	288.618	328.307	288.202	328.594	287.787	328.886
PtK_GFP-tub_mCh-p50	210712_003_05b_MAX10-17	307.125	309.125	307.539	308.603	307.952	308.082	308.366	307.56	308.78	307.039	309.193	306.518	309.608	305.997	310.022	305.476	310.436	304.956	310.851	304.436	311.266	303.916	311.682	303.397	312.097	302.878	312.513	302.36	312.93	301.843	313.347	301.326	313.764	300.81	314.182	300.294	314.601	299.779	315.02	299.265	315.44	298.752	315.86	298.24	316.281	297.729	316.703	297.219
[truncated: 155 more columns]

## Sheet: 1S5-Axes
# Condition	Cell_ID	MetaphasePlateAxis_slope	MetaphasePlateAxis_intercept	Perpendicular_slope	Perpendicular_intercept
PtK_GFP-tub	211216_007	-0.437015	367.429	2.28825	-324.335
PtK_GFP-tub	211223_003	-0.705324	445.647	1.41779	-53.1961
PtK_GFP-tub	210812_003	1.19899	-40.0403	-0.834036	491.826
PtK_GFP-tub	211223_007	0.675036	86.5987	-1.4814	706.718
PtK_GFP-tub	210812_001	0.0706579	218.379	-14.1527	4139.64
PtK_GFP-tub	211217_007	0.257798	175.357	-3.879	1211.32
PtK_GFP-tub	210812_002	0.204018	206.721	-4.90154	1550.57
PtK_GFP-tub	211217_001	0.85815	55.6754	-1.1653	578.838
PtK_GFP-tub	211216_002	0.534258	94.1567	-1.87176	709.976
PtK_GFP-tub	211223_005	1.13327	-65.7855	-0.882402	532.491
PtK_GFP-tub	210812_000	0.0746846	259.333	-13.3896	3347.31
PtK_GFP-tub	211216_008	-1.80106	738.408	0.555228	129.798
PtK_GFP-tub	210805_005	0.0351794	270.597	-28.4257	6192.54
PtK_GFP-tub	211216_001	-0.496402	422.139	2.01449	-222.744
PtK_GFP-tub	211223_001	-0.328067	318.217	3.04816	-368.177
PtK_GFP-tub	211223_009	0.585685	91.3932	-1.7074	676.876
PtK_GFP-tub_mCh-p50	181001_002	1.16587	11.6596	-0.857732	498.4
PtK_GFP-tub_mCh-p50	180817_019	0.66601	190.476	-1.50148	1211.63
PtK_GFP-tub_mCh-p50	180903_018	0.693916	278.654	-1.4411	1294.09
PtK_GFP-tub_mCh-p50	210519_002	0.330742	198.649	-3.02351	1028.93
PtK_GFP-tub_mCh-p50	190703_012	-1.00227	502.133	0.99773	-61.2226
PtK_GFP-tub_mCh-p50	190625_006	-0.241438	305.258	4.14185	-949.458
PtK_GFP-tub_mCh-p50	180903_006	0.557525	300.898	-1.79364	1360.1
PtK_GFP-tub_mCh-p50	190624_002	-0.0679227	241.861	14.7226	-3481.66
PtK_GFP-tub_mCh-p50	180903_007	1.04553	32.4482	-0.956455	1075.7
PtK_GFP-tub_mCh-p50	181005_001	-0.601954	521.214	1.66126	-300.02
PtK_GFP-tub_mCh-p50	210712_003	1.09519	0.678134	-0.91308	513.617
PtK_GFP-tub_mCh-p50	210519_010	0.201858	265.518	-4.95397	1469.51
PtK_GFP-tub_mCh-p50	190624_001	0.502456	151.529	-1.99023	730.307
PtK_GFP-tub_mCh-p50	210520_001	1.23475	-11.8749	-0.809881	487.903
PtK_GFP-tub_mCh-p50	190703_014	0.514959	98.7653	-1.9419	707.888
PtK_GFP-tub_mCh-p50	210519_005	-1.33356	579.231	0.749873	64.8313

## Sheet: 1S5A
Condition	K-fiber	Lengths
PtK_GFP-tub	Inner	5.20011	7.30871	7.92895	4.1088	7.87315	6.32586	7.89662	7.1657	7.35623	7.00577	7.35623	10.0917	9.94853	9.65196	8.44369	9.84924	6.9959	7.4637	7.68691	7.37368	5.56759	5.60192	9.18118	7.20357	7.8958	4.89506	8.84474	8.6499	8.90954	5.75296	10.8267	6.22314	8.28946	9.23266	9.04552	7.24195	7.06059	3.97411	7.79135	7.55614	6.12048	4.77098	7.66626	5.75296	6.61377	6.87625	6.4349	6.37371
PtK_GFP-tub	Outer	9.12093	9.74056	5.88553	8.28733	7.68852	7.18019	7.79042	10.1201	10.281	11.06	9.6366	8.10474	9.36395	7.38328	9.54696	9.37283	7.14975	7.56288	5.09831	7.82614	8.1707	10.7811	9.37283	11.6147	4.77098	8.59831	8.04859	10.0512	6.33069	6.29163	9.46534	12.9192	12.0147	12.1217	9.6366	8.75307	7.18019	6.07048	7.56288	8.6499	7.79042
PtK_GFP-tub_mCh-p50	Inner	10.7652	14.8067	6.03354	6.30605	8.91171	8.31281	6.22399	7.4049	3.37337	7.65465	8.06972	6.57192	9.73425	10.9857	6.92969	7.9659	5.67724	7.8318	4.05169	10.0149	9.16873	7.63217	7.14077	9.0018	5.25302	8.69322	7.15995	12.4805	15.0724	6.72296	10.372	11.7093	10.9889	6.96007	6.77153	11.687	4.29535	5.17065	6.85553	8.38135	8.01658	5.94848	6.9882	7.24014	6.27941	6.56584	3.55677	5.08164
PtK_GFP-tub_mCh-p50	Outer	9.62694	4.35094	9.09509	5.21892	8.73159	10.3978	7.04371	12.8215	4.7589	7.49166	8.42996	7.05638	11.817	4.44795	13.616	9.60178	10.0044	6.49587	8.9576	11.5077	13.1572	11.8214	11.8556	3.63114	9.0508	6.91965	8.09542	11.0178	10.7144	6.1809	7.59194	6.54705	7.42829	4.27921	10.2387	6.32151	4.52456	9.42173	11.897	7.13661	6.8263	7.05837	9.75	10.7708	10.5021	5.34135	7.94747	8.91964
[truncated: 83 more columns]

[truncated: 1 more sheets: 1S5B]
