# Supplementary material for: Kinetochore-fiber lengths are maintained locally but coordinated globally by poles in the mammalian spindle
Source: eLife. 2023 Jul 3;12:e85208. doi: 10.7554/eLife.85208 (PMC10348741; doi:10.7554/eLife.85208)
Supplement: Figure 1—source data 2. [file elife-85208-fig1-data2.xlsx]

## Sheet: 1H-RawLengthsOverTime
Condition	# K-fiber_ID	[Times (min)] [Lengths (µm)]
PtK_GFP-tub	211223_010_03a	[0.0	1	2	3	4	5	6	7	8	9	10	11	12	13	14.0]	[6.275	7.325	7.43	6.905	5.75	4.49	5.96	6.695	7.745	6.38	5.225	5.015	6.065	7.43	7.8500000000000005]
PtK_GFP-tub	211223_010_02b	[0.0	1	2	3	4	5	6	7	8	9	10	11	12	13	14.0]	[8.059999999999999	8.795	8.69	6.695	5.54	5.855	6.485	7.325	6.485	5.225	6.065	6.59	6.8	6.485	6.695]
PtK_GFP-tub	211223_010_01b	[0.0	1	2	3	4	5	6	7	8	9	10	11	12	13	14.0]	[7.954999999999999	7.955	7.64	7.535	6.905	7.955	7.745	7.01	5.75	5.225	6.485	7.64	8.06	7.535	6.8]
PtK_GFP-tub	211223_010_03b	[0.0	1	2	3	4	5	6	7	8	9	10	11	12	13	14.0]	[8.165	7.325	6.275	6.8	7.64	7.85	8.06	5.75	4.7	6.17	7.535	7.85	7.115	5.435	4.28]
PtK_GFP-tub	211223_010_02a	[0.0	1	2	3	4	5	6	7	8	9	10	11	12	13	14.0]	[6.695	5.645	6.485	7.22	7.64	8.27	6.485	5.645	7.325	7.85	6.905	7.745	6.695	7.535	7.64]
PtK_GFP-tub	211223_010_01a	[0.0	1	2	3	4	5	6	7	8	9	10	11	12	13	14.0]	[7.22	7.85	7.85	7.955	8.06	7.745	7.64	7.535	7.22	8.165	8.9	7.22	7.22	7.535	7.534999999999999]
PtK_GFP-tub	190131_003_02b	[0.0	1	2	3	4	5	6	7	8	9	10	11	12	13	14.0]	[9.635	9.32	8.375	7.01	7.955	7.535	9.215	8.06	8.9	7.85	7.43	9.32	8.69	7.85	7.430000000000001]
PtK_GFP-tub	190131_003_01b	[0.0	1	2	3	4	5	6	7	8	9	10	11	12	13	14	15	16	17.0]	[9.004999999999999	9.32	8.585	8.375	4.91	7.325	6.905	8.48	8.165	6.275	4.805	6.8	8.585	5.645	7.43	7.64	5.855	8.479999999999999]
PtK_GFP-tub	190131_003_02a	[0.0	1	2	3	4	5	6	7	8	9	10	11	12	13	14.0]	[9.424999999999999	7.64	7.01	9.74	8.48	8.585	8.27	8.375	7.745	7.64	8.375	7.325	7.325	8.795	8.69]
PtK_GFP-tub	190131_003_01a	[0.0	1	2	3	4	5	6	7	8	9	10	11	12	13	14	15	16	17.0]	[8.899999999999999	8.9	9.215	9.11	10.58	8.27	9.53	6.59	7.85	9.74	11.42	9.215	7.535	9.425	9.635	8.69	9.845	9.11]
PtK_GFP-tub	190131_004_02b	[0.0	1	2	3	4.0]	[7.745	6.695	7.115	6.905	7.534999999999999]
PtK_GFP-tub	190131_004_01b	[0.0	1	2	3	4.0]	[4.805	4.49	5.33	7.22	6.275]
PtK_GFP-tub	190131_004_02a	[0.0	1	2	3	4.0]	[7.22	7.43	7.325	7.64	7.114999999999999]
PtK_GFP-tub	190131_004_01a	[0.0	1	2	3	4.0]	[8.059999999999999	8.06	8.69	7.85	6.8]
PtK_GFP-tub	211217_008_03b	[0.0	1	2	3	4	5	6	7	8	9	10.0]	[7.325	6.38	6.695	6.8	7.115	6.17	5.33	5.225	6.065	8.06	6.905]
PtK_GFP-tub	211217_008_02a	[0.0	1	2	3	4	5	6	7	8	9	10	11	12	13	14	15	16	17	18	19	20	21	22.0]	[7.430000000000001	7.535	8.165	8.06	8.375	9.53	9.215	7.115	8.375	7.85	7.64	8.795	6.905	5.855	6.8	7.43	7.115	5.12	6.065	6.8	7.745	7.955	5.855]
PtK_GFP-tub	211217_008_01a	[0.0	1	2	3	4	5	6.0]	[7.64	7.535	7.325	4.91	5.12	4.595	4.385]
PtK_GFP-tub	211217_008_03a	[0.0	1	2	3	4	5	6	7	8	9	10.0]	[6.695	7.535	6.17	4.91	6.275	6.695	7.64	7.955	5.54	5.12	4.49]
PtK_GFP-tub	211217_008_02b	[0.0	1	2	3	4	5	6	7	8	9	10	11	12	13	14	15	16	17	18	19	20	21	22.0]	[6.8	5.435	5.75	7.43	6.905	6.17	5.435	5.33	7.115	6.905	6.38	6.38	6.695	7.955	6.17	5.225	5.015	6.275	6.38	5.435	4.28	4.385	5.645]
PtK_GFP-tub	211217_008_01b	[0.0	1	2	3	4	5	6.0]	[6.485	4.91	6.275	7.745	9.425	9.005	10.159999999999998]
PtK_GFP-tub	190703_001_02a	[0.0	1	2	3	4	5	6	7	8	9.0]	[8.69	8.27	8.06	8.795	8.585	5.96	7.01	8.165	8.585	7.64]
PtK_GFP-tub	190703_001_01a	[0.0	1	2	3	4	5	6	7	8.0]	[10.159999999999998	9.32	9.845	9.95	10.685	10.58	10.58	10.37	10.37]
PtK_GFP-tub	190703_001_02b	[0.0	1	2	3	4	5	6	7	8	9.0]	[8.899999999999999	7.745	7.85	6.59	8.375	7.43	6.59	5.96	5.645	6.065]
PtK_GFP-tub	190703_001_01b	[0.0	1	2	3	4	5	6	7	8.0]	[9.844999999999999	9.53	10.895	10.37	9.425	7.955	9.005	8.69	8.584999999999999]
PtK_GFP-tub	190702_001_03b	[0.0	1	2	3	4	5	6	7	8.0]	[5.855	7.01	7.325	7.535	7.22	6.905	6.065	6.38	6.59]
PtK_GFP-tub	190702_001_01a	[0.0	1	2	3	4	5	6	7	8	9	10	11.0]	[7.745	7.325	8.06	7.64	7.22	6.8	7.01	7.115	7.22	7.43	6.59	6.485]
PtK_GFP-tub	190702_001_02a	[0.0	1	2	3	4	5	6	7	8.0]	[8.165	7.22	7.745	7.85	7.535	7.01	7.43	7.22	7.954999999999999]
PtK_GFP-tub	190702_001_03a	[0.0	1	2	3	4	5	6	7	8.0]	[8.374999999999998	8.06	7.535	6.905	6.8	6.905	7.745	7.325	7.114999999999999]
PtK_GFP-tub	190702_001_01b	[0.0	1	2	3	4	5	6	7	8	9	10	11.0]	[8.69	8.48	7.325	6.485	7.955	7.43	7.64	8.27	7.955	9.425	9.95	9.319999999999999]
PtK_GFP-tub	190702_001_02b	[0.0	1	2	3	4	5	6	7	8.0]	[6.905	8.69	8.06	7.115	6.59	6.59	6.485	6.275	6.8]
PtK_GFP-tub	211223_002_03a	[0.0	1	2	3	4	5	6	7	8	9	10	11	12	13	14	15.0]	[5.645	7.115	7.535	8.27	6.905	6.38	7.115	7.325	6.905	7.115	4.91	7.325	8.06	8.375	8.27	9.53]
PtK_GFP-tub	211223_002_02b	[0.0	1	2	3	4	5	6.0]	[7.64	7.64	9.005	9.005	9.11	7.955	6.59]
PtK_GFP-tub	211223_002_01b	[0.0	1	2	3	4	5	6	7	8	9	10.0]	[6.905	7.22	8.375	6.38	8.27	8.06	8.06	8.48	9.74	5.855	7.8500000000000005]
PtK_GFP-tub	211223_002_03b	[0.0	1	2	3	4	5	6	7	8	9	10	11	12	13	14	15.0]	[8.27	7.115	6.275	6.905	7.955	8.585	7.01	6.8	7.325	7.325	8.06	7.955	7.955	6.59	6.59	5.855]
PtK_GFP-tub	211223_002_02a	[0.0	1	2	3	4	5	6.0]	[6.485	6.17	5.645	3.23	3.86	4.49	6.38]
PtK_GFP-tub	211223_002_01a	[0.0	1	2	3	4	5	6	7	8	9	10.0]	[7.22	6.905	5.75	7.85	6.17	6.695	6.485	5.33	4.385	7.64	7.114999999999999]
PtK_GFP-tub	211216_011_02b	[0.0	1	2	3	4.0]	[6.695	7.64	5.33	7.22	7.534999999999999]
PtK_GFP-tub	211216_011_01b	[0.0	1	2	3	4	5	6	7	8.0]	[7.8500000000000005	7.22	7.955	7.85	8.06	7.745	6.695	7.85	7.22]
PtK_GFP-tub	211216_011_03a	[0.0	1	2	3	4	5	6.0]	[5.015	5.75	6.8	4.805	4.805	7.115	4.805]
PtK_GFP-tub	211216_011_02a	[0.0	1	2	3	4.0]	[7.325	5.54	7.115	4.805	5.96]
PtK_GFP-tub	211216_011_01a	[0.0	1	2	3	4	5	6	7	8.0]	[7.64	7.115	5.645	6.17	5.645	5.225	7.01	7.85	8.374999999999998]
PtK_GFP-tub	211216_011_03b	[0.0	1	2	3	4	5	6.0]	[7.8500000000000005	7.115	6.275	6.59	7.955	5.225	6.59]
PtK_GFP-tub	211223_008_04b	[0.0	1	2	3	4	5	6	7	8	9	10	11	12	13	14	15.0]	[10.159999999999998	8.165	9.11	9.74	10.37	10.475	10.055	7.64	9.005	9.635	10.265	9.53	6.695	5.96	7.01	8.374999999999998]
PtK_GFP-tub	211223_008_01a	[0.0	1	2	3	4	5	6	7	8	9	10	11	12	13	14.0]	[9.424999999999999	9.95	10.16	9.635	10.37	10.055	10.055	9.635	10.16	9.95	9.845	9.215	8.585	8.9	8.374999999999998]
PtK_GFP-tub	211223_008_02a	[0.0	1	2	3	4	5	6	7	8	9	10	11	12	13	14	15.0]	[9.319999999999999	9.845	9.845	10.475	10.055	9.32	9.53	9.74	9.74	9.215	8.9	8.69	8.27	8.375	8.165	8.27]
PtK_GFP-tub	211223_008_03b	[0.0	1	2	3	4	5	6	7	8	9	10	11	12	13.0]	[9.319999999999999	9.005	8.585	9.53	9.215	9.845	9.635	9.95	9.95	10.58	10.37	9.845	9.74	8.899999999999999]
PtK_GFP-tub	211223_008_05a	[0.0	1	2	3	4	5	6	7	8	9	10	11	12	13	14	15.0]	[10.159999999999998	11	10.58	11.315	11	10.58	8.06	6.17	6.59	7.22	8.27	8.795	8.69	7.01	5.855	4.805]
PtK_GFP-tub	211223_008_01b	[0.0	1	2	3	4	5	6	7	8	9	10	11	12	13	14.0]	[11.419999999999998	10.055	10.265	9.74	10.265	9.845	10.685	10.79	10.37	10.79	11.105	10.37	10.685	10.475	9.844999999999999]
PtK_GFP-tub	211223_008_04a	[0.0	1	2	3	4	5	6	7	8	9	10	11	12	13	14	15.0]	[10.055	11	10.475	9.215	8.27	8.48	7.85	8.165	8.48	6.695	6.59	7.22	8.27	10.055	9.005	7.22]
PtK_GFP-tub	211223_008_02b	[0.0	1	2	3	4	5	6	7	8	9	10	11	12	13	14	15.0]	[9.739999999999998	9.425	8.9	8.795	9.53	8.795	9.005	9.845	10.16	10.055	10.475	10.58	10.265	10.37	9.95	9.95]
PtK_GFP-tub	211223_008_03a	[0.0	1	2	3	4	5	6	7	8	9	10	11	12	13.0]	[9.844999999999999	10.055	9.95	9.32	9.425	9.11	8.795	9.215	8.795	8.69	8.165	8.06	8.06	7.745]
PtK_GFP-tub	211223_008_05b	[0.0	1	2	3	4	5	6	7	8	9	10	11	12	13	14	15.0]	[9.95	10.58	8.585	7.325	8.69	10.37	11.105	11.105	10.685	9.11	8.27	8.48	9.11	9.845	10.79	10.79]
PtK_GFP-tub_mCh-p50	200612_004_03a	[0.0	1	2	3	4	5	6	7.0]	[5.145	5.775	6.825	5.985	4.095	4.305	5.04	5.3549999999999995]
PtK_GFP-tub_mCh-p50	200612_004_01b	[0.0	1	2	3	4	5	6	7	8	9	10	11	12	13	14	15	16	17	18	19	20	21	22	23	24	25	26	27	28	29	30	31	32	33	34.0]	[6.825	6.195	7.035	6.09	7.245	5.355	6.195	7.14	6.72	6.93	5.88	6.825	7.455
PtK_GFP-tub_mCh-p50	200612_004_02b	[0.0	1	2	3	4	5	6	7	8	9	10	11	12	13.0]	[5.984999999999999	7.14	7.665	6.93	5.775	6.51	6.405	6.825	7.98	7.56	7.98	7.14	6.405	8.4]
PtK_GFP-tub_mCh-p50	200612_004_03b	[0.0	1	2	3	4	5	6	7.0]	[6.614999999999999	4.2	4.725	5.775	6.825	7.665	6.405	3.885]
PtK_GFP-tub_mCh-p50	200612_004_01a	[0.0	1	2	3	4	5	6	7	8	9	10	11	12	13	14	15	16	17	18	19	20	21	22	23	24	25	26	27	28	29	30	31	32	33	34.0]	[8.19	6.615	5.46	5.565	6.09	6.09	7.245	5.88	6.3	6.195	6.3	6.09	6.09
PtK_GFP-tub_mCh-p50	200612_004_02a	[0.0	1	2	3	4	5	6	7	8	9	10	11	12	13.0]	[4.83	4.515	4.41	4.83	4.935	6.09	5.46	4.62	3.885	7.77	7.455	4.41	4.515	5.46]
PtK_GFP-tub_mCh-p50	210122_009_03b	[0.0	1	2	3	4	5	6	7	8	9	10	11	12	13.0]	[8.715	7.665	10.08	8.82	9.03	8.295	9.87	10.08	8.715	9.765	9.765	11.235	10.395	9.764999999999999]
PtK_GFP-tub_mCh-p50	210122_009_02a	[0.0	1	2	3	4	5	6	7	8	9	10	11	12	13	14	15	16	17	18	19	20	21	22	23	24	25	26	27	28	29	30	31	32	33	34	35	36	37	38	39	40	41	42	43	44	45	46	47
PtK_GFP-tub_mCh-p50	210122_009_01a	[0.0	1	2	3	4	5	6	7	8	9	10	11	12	13	14	15	16	17	18	19	20	21	22	23	24	25	26	27	28	29	30	31	32	33	34	35	36	37	38	39	40	41	42	43	44	45	46	47
PtK_GFP-tub_mCh-p50	210122_009_03a	[0.0	1	2	3	4	5	6	7	8	9	10	11	12	13.0]	[11.549999999999999	11.76	12.075	12.495	12.6	12.705	13.23	13.335	13.65	13.755	13.44	13.44	12.915	13.44]
PtK_GFP-tub_mCh-p50	210122_009_02b	[0.0	1	2	3	4	5	6	7	8	9	10	11	12	13	14	15	16	17	18	19	20	21	22	23	24	25	26	27	28	29	30	31	32	33	34	35	36	37	38	39	40	41	42	43	44	45	46	47
PtK_GFP-tub_mCh-p50	210122_009_01b	[0.0	1	2	3	4	5	6	7	8	9	10	11	12	13	14	15	16	17	18	19	20	21	22	23	24	25	26	27	28	29	30	31	32	33	34	35	36	37	38	39	40	41	42	43	44	45	46	47
PtK_GFP-tub_mCh-p50	181005_002_02b	[0.0	0.5	1	1.5	2	2.5	3	3.5	4	4.5	5	5.5	6	6.5	7	7.5	8	8.5	9.0]	[8.7381	7.3584	8.0154	7.5555	8.1468	7.4898	7.7526	7.4241	7.4898	7.1613	7.3584	7.3584	7.2927	7.3584	7.4241	7.7526	8.2125	7.6212	7.3584]
PtK_GFP-tub_mCh-p50	181005_002_01b	[0.0	0.5	1	1.5	2	2.5	3	3.5]	[6.898499999999999	5.8473	6.3729	7.227	8.1468	8.2782	5.9787	6.241499999999999]
PtK_GFP-tub_mCh-p50	181005_002_02a	[0.0	0.5	1	1.5	2	2.5	3	3.5	4	4.5	5	5.5	6	6.5	7	7.5	8	8.5	9.0]	[5.5188	6.0444	5.7159	7.9497	7.0956	7.227	7.4241	7.0956	7.3584	6.8985	7.227	7.3584	7.4898	7.1613	7.4898	7.227	6.9642	6.8328	5.584499999999999]
PtK_GFP-tub_mCh-p50	181005_002_01a	[0.0	0.5	1	1.5	2	2.5	3	3.5]	[4.598999999999999	5.5845	5.256	4.8618	4.599	3.8763	3.5478	3.0879]
PtK_GFP-tub_mCh-p50	191111_005_01b	[0.0	1	2	3	4	5	6	7	8	9	10	11	12.0]	[3.36	3.465	3.885	3.78	3.78	3.78	2.94	3.045	3.99	3.885	3.255	3.15	3.9899999999999998]
PtK_GFP-tub_mCh-p50	191111_005_02b	[0.0	1	2	3	4	5	6	7	8	9	10	11	12	13	14	15	16.0]	[14.07	13.965	13.44	12.495	11.235	11.445	11.025	11.97	12.18	12.915	10.71	10.605	11.025	10.605	11.445	11.34	11.445]
PtK_GFP-tub_mCh-p50	191111_005_03a	[0.0	1	2	3	4	5	6	7	8	9	10	11	12	13	14	15	16.0]	[5.7749999999999995	6.09	7.035	6.09	4.83	4.83	4.62	5.145	4.725	3.36	5.145	7.245	7.035	5.145	5.88	6.93	6.3]
PtK_GFP-tub_mCh-p50	191111_005_01a	[0.0	1	2	3	4	5	6	7	8	9	10	11	12.0]	[4.305	5.775	5.145	5.46	6.51	7.245	7.14	8.085	6.405	6.93	6.72	6.93	6.194999999999999]
PtK_GFP-tub_mCh-p50	191111_005_02a	[0.0	1	2	3	4	5	6	7	8	9	10	11	12	13	14	15	16.0]	[3.675	3.78	4.41	4.62	4.41	4.83	5.46	6.3	6.195	5.25	4.725	5.355	6.3	6.09	5.145	3.885	4.83]
PtK_GFP-tub_mCh-p50	191111_005_03b	[0.0	1	2	3	4	5	6	7	8	9	10	11	12	13	14	15	16.0]	[13.125	10.29	10.185	10.5	12.18	11.76	9.87	7.77	7.875	6.3	6.09	7.14	4.83	5.775	6.195	5.04	5.46]
PtK_GFP-tub_mCh-p50	210122_013_01b	[0.0	1	2	3	4	5	6	7	8	9	10	11	12	13	14	15	16	17	18	19	20	21	22	23	24	25	26	27	28	29	30	31	32.0]	[8.084999999999999	7.875	7.56	7.875	8.295	8.295	7.98	5.67	6.3	6.51	5.46	5.88	5.46	5.775	5.565
PtK_GFP-tub_mCh-p50	210122_013_01a	[0.0	1	2	3	4	5	6	7	8	9	10	11	12	13	14	15	16	17	18	19	20	21	22	23	24	25	26	27	28	29	30	31	32.0]	[7.665	6.93	6.615	7.455	6.825	4.515	6.72	5.145	5.67	5.565	5.355	5.46	5.355	5.46	5.145
PtK_GFP-tub_mCh-p50	190624_003_04b	[0.0	1	2	3	4	5	6	7	8	9	10	11	12	13	14	15	16	17	18	19	20	21	22	23	24	25	26	27	28	29	30	31	32	33	34	35	36	37	38	39.0]	[7.752599999999999	4.9275	5.1903	6.4386	7.0299	6.1101	4.7304	5.6502
PtK_GFP-tub_mCh-p50	190624_003_01a	[0.0	1	2	3	4	5	6	7	8	9	10	11	12	13	14	15	16	17	18	19	20	21	22	23	24	25	26	27	28	29	30	31	32.0]	[2.8251	3.8106	3.6135	3.2193	3.0222	2.4966	4.2048	3.942	3.7449	3.5478	3.7449	3.7449	4.6647	3.942	3.2193
PtK_GFP-tub_mCh-p50	190624_003_02a	[0.0	1	2	3	4	5	6	7	8	9	10	11	12	13	14	15	16	17	18	19	20	21	22	23	24	25	26	27	28	29	30	31	32	33	34	35	36	37	38	39	40.0]	[5.453099999999999	4.7304	5.6502	5.0589	6.0444	5.3217	5.1903
PtK_GFP-tub_mCh-p50	190624_003_03b	[0.0	1	2	3	4	5	6	7	8	9	10	11	12	13	14	15	16	17	18	19	20	21	22	23	24	25	26	27	28	29	30	31	32	33	34	35	36.0]	[5.453099999999999	5.6502	5.5188	6.3729	6.4386	7.884	8.1468	8.4753	8.6724	8.541	8.8695
PtK_GFP-tub_mCh-p50	190624_003_01b	[0.0	1	2	3	4	5	6	7	8	9	10	11	12	13	14	15	16	17	18	19	20	21	22	23	24	25	26	27	28	29	30	31	32	33.0]	[3.2849999999999997	2.7594	3.2193	2.628	3.0879	3.3507	2.4309	3.4821	3.7449	2.9565	3.2193	3.942	3.3507	4.2048
PtK_GFP-tub_mCh-p50	190624_003_04a	[0.0	1	2	3	4	5	6	7	8	9	10	11	12	13	14	15	16	17	18	19	20	21	22	23	24	25	26	27	28	29	30	31	32	33	34	35	36	37	38	39.0]	[7.292699999999999	7.884	7.1613	6.1101	7.4241	7.9497	8.8695	8.8695
PtK_GFP-tub_mCh-p50	190624_003_02b	[0.0	1	2	3	4	5	6	7	8	9	10	11	12	13	14	15	16	17	18	19	20	21	22	23	24	25	26	27	28	29	30	31	32	33	34	35	36	37	38	39	40.0]	[6.241499999999999	6.1101	6.2415	6.1758	6.2415	5.9787	6.4386
PtK_GFP-tub_mCh-p50	190624_003_03a	[0.0	1	2	3	4	5	6	7	8	9	10	11	12	13	14	15	16	17	18	19	20	21	22	23	24	25	26	27	28	29	30	31	32	33	34	35	36.0]	[8.540999999999999	9.0666	6.7671	6.1101	5.3217	6.0444	5.5845	5.7816	5.8473	5.0589	4.7961
PtK_GFP-tub_mCh-p50	181001_001_03b	[0.0	0.5	1	1.5	2	2.5	3	3.5	4	4.5	5	5.5	6	6.5	7	7.5	8	8.5	9	9.5	10	10.5	11	11.5	12	12.5]	[6.569999999999999	6.5043	6.57	6.6357	7.1613	7.7526	8.0154	6.6357	6.57	7.884	7.6869	7.4898	8.0811	7.9497	6.8328	7.9497	7.9497	9.6579	9.0009	8.8695	6.4386	9.6579
PtK_GFP-tub_mCh-p50	181001_001_04b	[0.0	0.5	1	1.5	2	2.5	3	3.5	4	4.5	5	5.5	6	6.5	7	7.5	8	8.5	9	9.5	10	10.5	11	11.5	12	12.5	13	13.5	14	14.5	15	15.5	16	16.5	17	17.5]	[4.3362	5.0589	5.5845	4.9932	3.6792	4.6647	6.1101	6.1758	3.8106	3.942	5.1246	5.9787
PtK_GFP-tub_mCh-p50	181001_001_01a	[0.0	0.5	1	1.5	2	2.5	3	3.5	4	4.5	5	5.5	6	6.5	7	7.5	8	8.5	9	9.5	10	10.5	11	11.5	12	12.5	13	13.5	14	14.5	15	15.5	16	16.5	17	17.5	18	18.5	19	19.5	20	20.5	21	21.5	22	22.5	23	23.5
PtK_GFP-tub_mCh-p50	181001_001_02a	[0.0	0.5	1	1.5	2	2.5	3	3.5	4	4.5	5	5.5	6	6.5	7	7.5	8	8.5	9	9.5	10	10.5	11	11.5	12	12.5	13	13.5	14	14.5	15	15.5	16	16.5	17	17.5	18	18.5	19	19.5	20	20.5	21	21.5	22	22.5	23	23.5
PtK_GFP-tub_mCh-p50	181001_001_03a	[0.0	0.5	1	1.5	2	2.5	3	3.5	4	4.5	5	5.5	6	6.5	7	7.5	8	8.5	9	9.5	10	10.5	11	11.5	12	12.5]	[5.5188	6.2415	5.5188	5.1903	2.8908	4.7304	4.7961	5.7159	6.8985	7.7526	7.8183	7.4898	6.9642	5.6502	5.913	5.7159	6.5043	5.5188	4.2705	4.4019	5.1246	3.5478
PtK_GFP-tub_mCh-p50	181001_001_01b	[0.0	0.5	1	1.5	2	2.5	3	3.5	4	4.5	5	5.5	6	6.5	7	7.5	8	8.5	9	9.5	10	10.5	11	11.5	12	12.5	13	13.5	14	14.5	15	15.5	16	16.5	17	17.5	18	18.5	19	19.5	20	20.5	21	21.5	22	22.5	23	23.5
PtK_GFP-tub_mCh-p50	181001_001_04a	[0.0	0.5	1	1.5	2	2.5	3	3.5	4	4.5	5	5.5	6	6.5	7	7.5	8	8.5	9	9.5	10	10.5	11	11.5	12	12.5	13	13.5	14	14.5	15	15.5	16	16.5	17	17.5]	[3.2849999999999997	2.2995	2.628	3.6135	4.0077	3.5478	3.4164	3.4164	2.8251	2.8908	2.9565	2.5623
PtK_GFP-tub_mCh-p50	181001_001_02b	[0.0	0.5	1	1.5	2	2.5	3	3.5	4	4.5	5	5.5	6	6.5	7	7.5	8	8.5	9	9.5	10	10.5	11	11.5	12	12.5	13	13.5	14	14.5	15	15.5	16	16.5	17	17.5	18	18.5	19	19.5	20	20.5	21	21.5	22	22.5	23	23.5
PtK_GFP-tub_mCh-p50	200611_001_01b	[0.0	0.2	0.4	0.6	0.8	1	1.2	1.4	1.6	1.8	2	2.2	2.4	2.6	2.8	3	3.2	3.4	3.6	3.8	4	4.2	4.4	4.6	4.8	5	5.2	5.4	5.6	5.8	6	6.2	6.4	6.6	6.8	7	7.2	7.4	7.6	7.8	8	8.2	8.4	8.6	8.8	9	9.2	9.4
PtK_GFP-tub_mCh-p50	200611_001_01a	[0.0	0.2	0.4	0.6	0.8	1	1.2	1.4	1.6	1.8	2	2.2	2.4	2.6	2.8	3	3.2	3.4	3.6	3.8	4	4.2	4.4	4.6	4.8	5	5.2	5.4	5.6	5.8	6	6.2	6.4	6.6	6.8	7	7.2	7.4	7.6	7.8	8	8.2	8.4	8.6	8.8	9	9.2	9.4
PtK_GFP-tub_mCh-p50	190625_009_01b	[0.0	1	2	3	4	5	6	7	8	9	10	11	12	13	14	15	16.0]	[3.885	5.355	7.035	6.93	5.355	5.25	5.67	5.985	4.62	6.09	7.14	7.14	6.825	5.565	6.72	7.35	5.67]
PtK_GFP-tub_mCh-p50	190625_009_02b	[0.0	1	2	3	4	5	6	7.0]	[4.515	6.195	6.825	7.56	5.145	5.04	7.56	8.19]
PtK_GFP-tub_mCh-p50	190625_009_01a	[0.0	1	2	3	4	5	6	7	8	9	10	11	12	13	14	15	16.0]	[7.77	6.195	4.83	4.515	6.72	6.615	4.515	4.515	7.14	7.14	5.775	5.67	7.035	7.875	6.615	6.09	7.665]
PtK_GFP-tub_mCh-p50	190625_009_02a	[0.0	1	2	3	4	5	6	7.0]	[10.5	9.345	8.295	8.61	9.87	10.185	9.975	9.03]
[truncated: 496 more columns]

## Sheet: 1I
Condition	Mean k-fiber lengths (averaged over time)
PtK_GFP-tub	6.436	6.786	7.213	6.73	7.052	7.71	8.305	7.36583	8.228	9.08667	7.199	5.624	7.346	7.892	6.55182	7.46652	5.93	6.275	6.065	7.715	7.976	10.2067	7.115	9.36667	6.765	7.22	7.57	7.41833	8.24375	7.05667	7.29875	8.135	7.745	7.28562	5.18	6.50409	6.884	7.605	5.585	6.149	6.74167	6.8	8.88687	9.621	9.23469	9.605	8.50625	10.447	8.56531
PtK_GFP-tub_mCh-p50	5.31562	6.258	7.05	5.76187	5.634	5.2275	9.4425	9.44588	6.405	12.885	9.46853	9.62088	7.62466	6.87386	6.92962	4.42654	3.56192	11.8774	5.65765	6.37269	5.01529	8.25794	6.22364	5.56818	5.71261	4.45964	6.27675	6.83813	3.9478	6.65377	6.3729	6.3729	7.79303	7.55732	9.25799	9.2797	5.52385	10.911	2.89445	11.1075	6.30502	9.74454	6.03441	6.37875	6.27529	9.47625
[truncated: 3 more columns]

## Sheet: 1J
Condition	CVs of k-fiber lengths (averaged over time)
PtK_GFP-tub	16.0308	15.394	11.8066	18.4571	11.0537	5.90641	9.95127	18.988	9.48613	12.0515	6.04897	19.9078	2.74941	8.7041	12.8263	14.6121	25.1183	18.5579	15.3522	24.8321	11.1842	4.30694	15.5091	9.83848	8.57179	6.4444	5.09636	7.47106	12.0482	11.359	15.1566	11.6335	14.0367	10.706	25.3677	15.9295	13.702	5.97848	17.8968	17.3049	16.5399	13.9256	16.0725	6.29468	7.76973	5.80723	24.6197	4.56596	15.5206
PtK_GFP-tub_mCh-p50	16.759	17.1986	11.2347	23.5886	16.9907	22.0057	9.96951	18.222	14.5929	5.51238	10.2424	13.5997	5.21356	13.7176	10.0456	19.3672	10.5233	9.52588	18.8339	15.7232	17.1772	32.7919	17.1963	17.0073	13.6874	28.7649	16.429	18.3843	23.6188	22.2225	10.5815	21.0128	13.7439	29.182	26.7405	20.29	22.6219	14.9275	20.782	23.9978	17.42	16.741	16.4282	21.4398	18.3725	8.28647
[truncated: 3 more columns]

## Sheet: 1K
Condition	CVs of k-fiber lengths (averaged over time)
PtK_GFP-tub
PtK_GFP-tub_mCh-p50

## Sheet: 1M
Condition	Sum of sister k-fiber lengths (averaged over time)
PtK_GFP-tub	14.923	13.838	13.166	16.4525	16.533	13.516	14.545	13.645	13.5315	12.8268	19.5733	15.091	15.4637	14.6267	14.1833	14.2491	13.315	14.5844	14.3467	13.033	12.385	20.068	18.9747	18.55	17.4522	18.1806
PtK_GFP-tub_mCh-p50	11.892	12.2775	11.0775	16.0259	18.9144	22.3275	11.3004	14.5543	9.93462	16.8926	13.9156	11.7918	8.42752	12.6497	13.211	12.3664	20.1689	20.3872	13.3169	10.4518	16.0496	12.3097	15.855

## Sheet: 1N
Condition	CVs of summed sister k-fiber lengths (averaged over time)
PtK_GFP-tub	5.46829	5.10994	5.98979	6.00384	5.39144	7.59971	2.10467	6.1858	10.1649	6.96792	3.89102	9.89323	5.65973	6.14162	3.59088	2.90708	6.74865	5.10352	7.00507	6.15147	5.74708	3.84894	2.93664	3.79941	9.338	9.7257
PtK_GFP-tub_mCh-p50	12.3303	12.4949	8.83386	10.936	9.49131	6.4786	10.9079	4.46463	9.537	6.04989	19.6221	15.7008	20.0131	11.2438	13.6443	10.731	17.5837	14.6199	9.87779	19.8272	11.088	8.81061	6.411

## Sheet: 3A
Condition	k-fiber	lag=1	2	3	4	5	6	7	8	9	10	11	12	13	14	15	16	17	18	19	20	21	22	23	24	25	26	27	28	29	30	31	32	33	34	35	36	37	38	39	40	41	42	43	44	45	46	47	48
PtK_GFP-tub	190131_003_01a Autocorrelation	0.0208242	-0.30861	-0.395345	0.0199028	0.0881371	0.143332	0.103767	-0.0917892	-0.12841	0.0377692	-0.0431372	0.0687217	-0.00803856	0.00341172	-0.00316468	-0.00715726	-0.00021365
PtK_GFP-tub	190131_003_01b Autocorrelation	0.0970158	-0.0999842	-0.0957797	-0.184589	0.170379	0.244151	0.020812	-0.288247	-0.0886394	-0.113813	-0.051221	0.0798507	-0.19913	-0.00230437	-0.0344213	-0.0089985	0.0549191
PtK_GFP-tub	190131_003_02a Autocorrelation	-0.0912099	-0.323578	0.209307	-0.00289555	-0.154602	-0.0937952	0.110238	-0.208997	-0.0876939	0.326008	-0.0635471	-0.231799	0.0477249	0.0648397
PtK_GFP-tub	190131_003_02b Autocorrelation	0.0874968	-0.1928	-0.412375	-0.0593133	0.0942864	0.110684	0.0552139	-0.170126	-0.113759	0.0825006	0.297207	-0.00115296	-0.156162	-0.121701
PtK_GFP-tub	190131_004_01a Autocorrelation	0.0925234	-0.394393	-0.100935	-0.0971963
PtK_GFP-tub	190131_004_01b Autocorrelation	0.365347	-0.351099	-0.407916	-0.106332
PtK_GFP-tub	190131_004_02a Autocorrelation	-0.52973	0.197297	-0.345946	0.178378
PtK_GFP-tub	190131_004_02b Autocorrelation	-0.404651	0.0976744	-0.434884	0.24186
PtK_GFP-tub	190702_001_01a Autocorrelation	0.393519	0.0740741	-0.0833333	-0.0601852	0.037037	0.115741	-0.0601852	-0.342593	-0.240741	-0.171296	-0.162037
PtK_GFP-tub	190702_001_01b Autocorrelation	0.573724	0.185039	0.0188595	-0.155956	-0.221298	-0.317374	-0.410401	-0.305055	-0.00539751	0.0935992	0.0442596
PtK_GFP-tub	190702_001_02a Autocorrelation	-0.183128	-0.00823045	-0.135802	0.0329218	-0.199588	0.0895062	-0.288066	0.192387
PtK_GFP-tub	190702_001_02b Autocorrelation	0.496955	0.0439572	-0.153321	-0.231676	-0.323377	-0.281617	-0.0584949	0.00757335
PtK_GFP-tub	190702_001_03a Autocorrelation	0.445109	-0.11377	-0.367065	-0.263432	-0.0556109	0.0884015	-0.115542	-0.11809
PtK_GFP-tub	190702_001_03b Autocorrelation	0.371129	-0.0774135	-0.464481	-0.426685	-0.241348	0.165301	0.114299	0.0591985
PtK_GFP-tub	190703_001_01a Autocorrelation	0.477197	0.178641	-0.325938	-0.292481	-0.29072	-0.143159	-0.0986089	-0.00493045
PtK_GFP-tub	190703_001_01b Autocorrelation	0.45947	0.115479	-0.142325	-0.217835	-0.375746	-0.217574	-0.0664343	-0.0550347
PtK_GFP-tub	190703_001_02a Autocorrelation	0.174507	-0.407759	-0.1375	0.134606	-0.197352	-0.119828	0.0399015	0.0469212	-0.0334975
PtK_GFP-tub	190703_001_02b Autocorrelation	0.421529	0.246479	-0.0915493	0.0442656	-0.10664	-0.200201	-0.343058	-0.299799	-0.171026
PtK_GFP-tub	211216_011_01a Autocorrelation	0.456801	-0.0669403	-0.312233	-0.429324	-0.342967	-0.114245	0.161398	0.14751
PtK_GFP-tub	211216_011_01b Autocorrelation	-0.24963	0.0940741	-0.14	-0.227407	0.227407	-0.273333	0.125926	-0.057037
PtK_GFP-tub	211216_011_02a Autocorrelation	-0.518598	0.391237	-0.323564	-0.049075
PtK_GFP-tub	211216_011_02b Autocorrelation	-0.455514	-0.130359	0.120446	-0.0345725
PtK_GFP-tub	211216_011_03a Autocorrelation	-0.437017	-0.392688	0.464304	-0.0418137	-0.166954	0.0741686
PtK_GFP-tub	211216_011_03b Autocorrelation	-0.270492	-0.211066	0.188525	0.153689	-0.319672	-0.0409836
PtK_GFP-tub	211217_008_01a Autocorrelation	0.565716	0.167636	-0.250203	-0.426915	-0.357768	-0.198465
PtK_GFP-tub	211217_008_01b Autocorrelation	0.583853	0.156405	-0.300509	-0.419703	-0.383483	-0.136563
PtK_GFP-tub	211217_008_02a Autocorrelation	0.445803	0.162867	0.25522	0.276219	0.343366	0.0643109	-0.185877	-0.240678	-0.0870409	-0.0634418	-0.325803	-0.297628	-0.255174	-0.206735	-0.0421515	-0.117582	-0.121898	-0.0371973	-0.0218354	-0.042095	-0.00489538	0.00224753
PtK_GFP-tub	211217_008_02b Autocorrelation	0.433526	-0.143353	-0.153757	0.209249	0.394798	-0.0450867	-0.375723	-0.184393	0.102312	0.0716763	-0.242197	-0.310405	-0.00231214	0.175145	0.0554913	-0.171676	-0.195954	-0.0763006	0.0323699	-0.00635838	-0.0508671	-0.016185
PtK_GFP-tub	211217_008_03a Autocorrelation	0.374797	-0.24065	-0.543089	-0.356098	0.145528	0.320325	0.172358	-0.11626	-0.201626	-0.0552846
PtK_GFP-tub	211217_008_03b Autocorrelation	0.33062	-0.241543	-0.443991	-0.181921	0.0450933	-0.0301912	-0.0904317	-0.0828323	0.15653	0.038668
PtK_GFP-tub	211223_002_01a Autocorrelation	-0.0698752	-0.21398	-0.00850522	-0.0759528	-0.195688	0.227154	-0.160649	-0.141822	0.098574	0.0407436
PtK_GFP-tub	211223_002_01b Autocorrelation	-0.293843	-0.00559701	0.0960821	-0.0783582	-0.308769	0.274254	-0.253731	-0.0522388	0.129664	-0.00746269
PtK_GFP-tub	211223_002_02a Autocorrelation	0.338053	-0.210029	-0.628589	-0.178343	0.0277549	0.151153
PtK_GFP-tub	211223_002_02b Autocorrelation	0.283244	-0.311882	-0.449213	-0.323355	0.158893	0.142313
PtK_GFP-tub	211223_002_03a Autocorrelation	0.279092	0.0461712	-0.141854	-0.065015	-0.134722	0.00217718	-0.223086	-0.0687688	-0.0129505	0.149174	0.00739489	0.0512012	-0.0779655	-0.109835	-0.201014
PtK_GFP-tub	211223_002_03b Autocorrelation	0.303817	-0.252831	-0.467589	-0.115902	0.12736	0.133079	0.106482	-0.0629719	-0.219137	-0.228821	0.0608011	0.221912	0.0964021	-0.048286	-0.154315
PtK_GFP-tub	211223_008_01a Autocorrelation	0.561657	0.431787	0.128285	-0.0402328	-0.111556	-0.18016	-0.141979	-0.294465	-0.254137	-0.327035	-0.129965	-0.137446	-0.0523142	0.0475618
PtK_GFP-tub	211223_008_01b Autocorrelation	0.0279034	0.107491	-0.0727273	-0.217874	-0.405245	-0.028934	-0.154699	-0.1501	0.0875404	0.225042	0.0792032	0.103646	0.0826334	-0.183879
PtK_GFP-tub	211223_008_02a Autocorrelation	0.800789	0.561245	0.369351	0.178795	0.0439179	-0.122278	-0.244306	-0.325912	-0.364688	-0.385351	-0.424484	-0.318082	-0.170279	-0.0880588	-0.0106574
PtK_GFP-tub	211223_008_02b Autocorrelation	0.739919	0.52621	0.41129	0.133065	-0.199597	-0.328629	-0.387097	-0.429435	-0.350806	-0.282258	-0.171371	-0.104839	-0.0443548	-0.0120968	0
PtK_GFP-tub	211223_008_03a Autocorrelation	0.747439	0.536164	0.304464	0.10601	0.00273173	-0.109456	-0.119079	-0.297541	-0.399081	-0.417179	-0.411809	-0.293661	-0.149004
PtK_GFP-tub	211223_008_03b Autocorrelation	0.527815	0.387016	-0.0185803	-0.129784	-0.210225	-0.277036	-0.355919	-0.421173	-0.177236	-0.110481	0.140854	0.0950712	0.0496773
PtK_GFP-tub	211223_008_04a Autocorrelation	0.613538	0.150604	-0.0224244	-0.0738283	0.0309633	-0.0236379	-0.240049	-0.344896	-0.372386	-0.219896	0.0303557	0.118927	0.0271812	-0.0988504	-0.0756008
PtK_GFP-tub	211223_008_04b Autocorrelation	0.537462	0.0543885	-0.22293	-0.106345	0.174114	0.215719	-0.13059	-0.293659	-0.316587	-0.172937	-0.0200115	-0.0500991	-0.0812224	-0.0660069	-0.0212949
PtK_GFP-tub	211223_008_05a Autocorrelation	0.73189	0.364651	0.0509992	-0.0771745	-0.0762213	-0.0134699	0.0468514	0.0171778	-0.139528	-0.270257	-0.28644	-0.293699	-0.254787	-0.206951	-0.093043
PtK_GFP-tub	211223_008_05b Autocorrelation	0.57181	-0.162139	-0.592058	-0.638483	-0.357403	0.115856	0.433045	0.384559	0.164242	-0.0760906	-0.228978	-0.185164	-0.00762236	0.0635889	0.0148374
PtK_GFP-tub	211223_010_01a Autocorrelation	0.0932489	-0.437553	-0.174684	-0.144726	0.0535865	0.207595	0.0780591	0.0637131	-0.107595	-0.283966	0.035865	0.0658228	0.021097	0.0295359
PtK_GFP-tub	211223_010_01b Autocorrelation	0.571951	-0.0629168	-0.409092	-0.255412	0.0851793	0.0502099	-0.15437	-0.293075	-0.193615	0.0363641	0.0935476	0.0680614	-0.00665026	-0.0301819
PtK_GFP-tub	211223_010_02a Autocorrelation	0.188751	-0.328823	-0.255417	-0.164126	0.259461	0.30591	-0.174857	-0.114671	0.0551581	-0.0344738	0.0093831	-0.104095	-0.117522	-0.024676
PtK_GFP-tub	211223_010_02b Autocorrelation	0.602027	-0.0230219	-0.288165	-0.105314	0.14258	0.0792072	-0.167029	-0.300064	-0.219398	-0.0749383	-0.0514737	-0.0497546	-0.0370666	-0.00758844
PtK_GFP-tub	211223_010_03a Autocorrelation	0.445637	-0.345311	-0.73189	-0.322453	0.332742	0.50076	0.140123	-0.300855	-0.408483	-0.130236	0.104018	0.157615	0.0736108	-0.0152759
PtK_GFP-tub	211223_010_03b Autocorrelation	0.393615	-0.339344	-0.497618	-0.149597	0.379948	0.506975	-0.00805263	-0.365374	-0.218952	-0.0311897	0.104344	0.0415107	-0.15351	-0.162754
Average Autocorrelation of control		0.260066	-0.0215592	-0.171655	-0.111899	-0.0515498	0.0224405	-0.082496	-0.147596	-0.1287	-0.0784954	-0.06174	-0.0543952	-0.0572828	-0.0455045	-0.0471111	-0.0763536	-0.0657867	-0.0567489	0.00526726	-0.0242267	-0.0278812	-0.00696872
Standard Deviation of Autocorrelation of control		0.358784	0.268801	0.276722	0.191091	0.227315	0.202546	0.185793	0.179601	0.168541	0.176807	0.17742	0.168592	0.104317	0.0964699	0.0731105	0.0818761	0.113962	0.0276502	0.038329	0.0252696	0.0325069	0.0130337
Standard Error of Autocorrelation of control		0.0497544	0.037276	0.0383744	0.0264996	0.0335157	0.0298637	0.0293764	0.0283973	0.0297941	0.0322804	0.034795	0.0344137	0.0212936	0.0205674	0.0211052	0.040938	0.0569808	0.0195517	0.0271027	0.0178683	0.0229858	0.00921625
PtK_GFP-tub_mCh-p50	181001_001_01a Autocorrelation	0.792703	0.675537	0.621546	0.465344	0.29302	0.156538	0.150724	0.0642857	-0.0287408	-0.0623837	-0.097912	-0.166157	-0.303326	-0.363441	-0.375763	-0.405421	-0.435612	-0.372376	-0.26771	-0.236118	-0.177972	-0.0665791	-0.0380122	-0.0666841	-0.0732479	-0.0364828	-0.0613584	-0.077765	-0.0345628	-0.0313955	0.0020961	0.00224687	0.0135176	0.0414632
PtK_GFP-tub_mCh-p50	181001_001_01b Autocorrelation	0.482222	0.24337	0.236602	0.209781	0.0662231	-0.0109311	0.0486383	0.133527	0.0443479	0.00540806	-0.00247661	0.0696015	-0.122061	-0.18511	-0.141967	-0.0899954	-0.160612	-0.186823	-0.0742725	-0.0320578	-0.123474	-0.0303851	0.0133792	-0.0130443	-0.0766761	-0.148727	-0.0663215	-0.0444312	-0.128384	-0.168084	-0.056248	0.0214253	-0.116263	-0.096183
PtK_GFP-tub_mCh-p50	181001_001_02a Autocorrelation	0.296518	-0.084231	-0.0745069	-0.415938	-0.311394	0.0204241	-0.0146375	0.0810706	0.137114	-0.00134416	0.00869148	-0.128295	-0.195917	0.123271	0.0464901	-0.091375	0.0118044	0.00176139	-0.0370775	0.169889	0.221463	0.00508779	-0.0631636	-0.0751245	-0.0586092	-0.0570957	-0.0571985	0.00960272	0.0177456	0.00956766	0.0396334	0.0180499	-0.0548871	-0.0165182	0.0557289	-0.0162885	-0.0314808	0.0111697
PtK_GFP-tub_mCh-p50	181001_001_02b Autocorrelation	0.784359	0.550917	0.322013	0.144247	-0.000462385	-0.166347	-0.221791	-0.239268	-0.229282	-0.20378	-0.253834	-0.255691	-0.298128	-0.256257	-0.194767	-0.140333	-0.124372	-0.14822	-0.0821045	-0.0144405	0.0149334	0.0401221	0.0302551	0.0810511	0.0913892	0.065012	0.0223322	0.0146335	0.0298207	0.028517	0.0241003	0.0353859	0.02529	0.0103456	0.0176798	0.0112193	-0.00570155	-0.00884563
PtK_GFP-tub_mCh-p50	181001_001_03a Autocorrelation	0.513033	-0.0702746	-0.282195	-0.247978	-0.346169	-0.319708	-0.000161451	0.170688	0.126219	-0.0146321	-0.0294211	0.000599067
PtK_GFP-tub_mCh-p50	181001_001_03b Autocorrelation	0.407293	0.347329	0.341307	-0.0388639	-0.0702645	-0.124873	-0.234482	-0.377735	-0.249049	-0.258362	-0.238926	-0.00337239
PtK_GFP-tub_mCh-p50	181001_001_04a Autocorrelation	0.405385	-0.0948733	-0.308845	0.018253	0.339484	0.322671	0.0394424	-0.285212	-0.275981	-0.147138	0.0989434	0.0273881	-0.150131	-0.255231	-0.216945	-0.0408596	0.0236496
PtK_GFP-tub_mCh-p50	181001_001_04b Autocorrelation	0.783141	0.6884	0.529803	0.375952	0.102111	-0.11251	-0.193414	-0.349608	-0.438612	-0.446004	-0.378693	-0.350708	-0.316275	-0.181507	-0.120606	-0.0493307	-0.0421385
PtK_GFP-tub_mCh-p50	181005_002_01a Autocorrelation	0.242319	-0.392331	-0.349987
PtK_GFP-tub_mCh-p50	181005_002_01b Autocorrelation	-0.412019	-0.233368	0.145387
PtK_GFP-tub_mCh-p50	181005_002_02a Autocorrelation	0.202552	-0.0968003	-0.151058	-0.134046	-0.174181	-0.268744	-0.243997	-0.000338022	0.366613
PtK_GFP-tub_mCh-p50	181005_002_02b Autocorrelation	0.27821	0.0601561	-0.160056	-0.386082	-0.153546	-0.0920777	-0.0141671	0.137652	-0.170088
PtK_GFP-tub_mCh-p50	190624_003_01a Autocorrelation	0.685893	0.578751	0.604298	0.565465	0.427992	0.253927	0.191184	0.156509	0.0724486	-0.037398	-0.0242392	-0.0448424	-0.116431	-0.0848588	-0.144204	-0.127247	-0.138459	-0.225768	-0.200028	-0.213704	-0.241356	-0.275567	-0.353559	-0.294874	-0.259586	-0.271309	-0.307986	-0.224991	-0.163029	-0.114564	-0.0886077	-0.0838596
PtK_GFP-tub_mCh-p50	190624_003_01b Autocorrelation	0.619246	0.458303	0.501534	0.496427	0.368866	0.1572	0.00582394	0.0035262	0.0341106	-0.242262	-0.245273	-0.289028	-0.324575	-0.328289	-0.372217	-0.412087	-0.327098	-0.254144	-0.212772	-0.11633	-0.167736	-0.09511	0.0213635	0.00496328	-0.0305396	0.0332942	0.0312973	0.0216452	0.052504	0.0149125	0.0298147	0.0473188	0.0153117
PtK_GFP-tub_mCh-p50	190624_003_02a Autocorrelation	0.698222	0.675712	0.597573	0.597692	0.528716	0.472683	0.465411	0.415952	0.29081	0.262478	0.185074	0.11243	0.065572	-0.0211951	-0.029355	-0.0651125	-0.137076	-0.177227	-0.338923	-0.286529	-0.361601	-0.376387	-0.385458	-0.316417	-0.275129	-0.339605	-0.344924	-0.307175	-0.307454	-0.27872	-0.234856	-0.23386	-0.192879	-0.208851	-0.175023	-0.128258	-0.128938	-0.0968526	-0.0881249	-0.0323948
PtK_GFP-tub_mCh-p50	190624_003_02b Autocorrelation	0.351685	0.0792596	0.345515	0.154485	-0.0263408	0.269578	0.184148	-0.0885145	-0.0142383	0.0659706	-0.00498339	-0.0308495	0.0484101	-0.0505458	-0.121737	-0.0828192	-0.0923113	-0.338633	-0.157333	-0.0348837	-0.262933	-0.200997	-0.051495	-0.137636	-0.129093	0.0652587	0.02729	-0.018747	-0.0128144	-0.0189843	-0.067869	-0.0415282	-0.0536308	-0.021832	-0.0199336	-0.0154248	-0.00735643	0.00806834	0.00427148	-0.000474608
PtK_GFP-tub_mCh-p50	190624_003_03a Autocorrelation	0.754212	0.48529	0.247593	0.0450655	-0.095012	-0.155055	-0.200254	-0.299412	-0.334648	-0.425448	-0.443835	-0.388473	-0.248462	-0.165485	-0.0549612	0.0328296	0.0465365	0.0313587	0.0619818	0.158799	0.206539	0.242445	0.172506	0.0666622	-0.0319604	-0.0599091	-0.0912677	-0.0920032	-0.0114335	0.00314255	0.0240706	0.0403183	0.0236694	-0.00742177	-0.0269457	-0.0110324
PtK_GFP-tub_mCh-p50	190624_003_03b Autocorrelation	0.732228	0.623053	0.365769	0.1976	-0.0416152	-0.175937	-0.298463	-0.324865	-0.202322	-0.214976	-0.0990401	-0.0210112	0.117614	0.136324	0.167239	0.098961	0.0391949	-0.0244385	-0.168892	-0.242919	-0.372939	-0.368156	-0.39657	-0.310489	-0.237794	-0.100512	-0.0257717	0.0350146	0.103312	0.107105	0.120535	0.0901523	0.0837769	0.0513355	0.0429752	0.0145241
PtK_GFP-tub_mCh-p50	190624_003_04a Autocorrelation	0.752027	0.586334	0.519368	0.520269	0.446948	0.387421	0.315734	0.205736	0.0971409	0.0850054	0.0355659	-0.0750093	-0.0960785	-0.157612	-0.168764	-0.18608	-0.184124	-0.303765	-0.317123	-0.314292	-0.296831	-0.304266	-0.282467	-0.284764	-0.347488	-0.353122	-0.232211	-0.166766	-0.144254	-0.0977636	-0.0802848	-0.0349358	-0.0162509	0.00541049	-0.0196933	-0.0378859	0.00447514	0.0282248	0.0121723
PtK_GFP-tub_mCh-p50	190624_003_04b Autocorrelation	0.248601	0.0995121	0.16338	0.274261	0.229718	0.0577916	-0.07438	0.0335144	-0.016496	-0.126292	-0.17671	-0.144025	-0.27015	-0.0921604	-0.212891	-0.223355	-0.124494	-0.136171	-0.175193	-0.141214	-0.123889	-0.00360343	-0.0330215	-0.124063	0.0637027	0.00343688	0.0755232	0.129524	0.0686159	0.011319	0.0336759	0.127224	0.0946374	0.00917196	-0.035851	-0.0029128	0.101451	-0.0997113	0.0115231
PtK_GFP-tub_mCh-p50	190625_009_01a Autocorrelation	0.210803	-0.449286	0.000950676	0.561543	0.119543	-0.489225	-0.256406	0.226763	-0.019896	-0.327786	-0.163913	0.0686621	0.00871393	-0.0698657	-0.0182691	0.0976685
PtK_GFP-tub_mCh-p50	190625_009_01b Autocorrelation	0.240627	-0.306217	-0.100235	0.179615	0.0651314	-0.237301	-0.0637364	0.326276	0.0167499	-0.262132	-0.214774	0.0465159	0.097503	-0.173748	-0.164088	0.0498129
PtK_GFP-tub_mCh-p50	190625_009_02a Autocorrelation	0.257822	-0.531609	-0.552203	0.0249042	0.275064	0.131865	-0.105843
PtK_GFP-tub_mCh-p50	190625_009_02b Autocorrelation	0.117632	-0.539474	-0.260579	0.398105	0.235737	-0.193579	-0.257842
PtK_GFP-tub_mCh-p50	191111_005_01a Autocorrelation	0.450638	0.411484	0.102795	-0.133178	-0.322973	-0.229156	-0.385092	-0.112829	-0.156207	-0.0691474	-0.0868322	0.0304963
PtK_GFP-tub_mCh-p50	191111_005_01b Autocorrelation	0.0638446	-0.620299	-0.136434	0.22067	-0.0112599	-0.022868	0.0616004	-0.126567	-0.0446138	0.14247	0.0247253	-0.0512692
PtK_GFP-tub_mCh-p50	191111_005_02a Autocorrelation	0.600276	0.0602467	-0.106763	0.0775661	0.145838	-0.0828316	-0.369065	-0.372175	-0.175558	-0.0997494	-0.170582	-0.216346	-0.0710123	0.112388	0.146853	0.0209143
PtK_GFP-tub_mCh-p50	191111_005_02b Autocorrelation	0.623734	0.29148	-0.0291845	-0.164681	-0.0589949	0.0567915	0.163775	0.073495	-0.0612411	-0.315159	-0.307219	-0.256565	-0.234313	-0.134041	-0.101594	-0.0462847
PtK_GFP-tub_mCh-p50	191111_005_03a Autocorrelation	0.463007	-0.143812	-0.0362597	0.163468	-0.0741888	-0.44793	-0.470536	-0.182775	0.0485107	0.0219066	-0.0777734	0.0145715	0.113735	0.0804193	0.0235067	0.00414948
PtK_GFP-tub_mCh-p50	191111_005_03b Autocorrelation	0.734931	0.582619	0.483255	0.347277	0.155249	-0.0157629	-0.208493	-0.301301	-0.379793	-0.416502	-0.377036	-0.374112	-0.24505	-0.187266	-0.181949	-0.116067
PtK_GFP-tub_mCh-p50	200611_001_01a Autocorrelation	0.861494	0.713437	0.602404	0.479751	0.42848	0.356262	0.261034	0.192042	0.134339	0.112283	0.120998	0.0749372	0.0101578	-0.0473067	-0.0645974	-0.0502048	-0.0325659	-0.036187	-0.0770777	-0.100879	-0.130937	-0.174305	-0.248774	-0.315494	-0.347104	-0.348009	-0.29913	-0.252845	-0.236847	-0.242835	-0.253203	-0.253638	-0.226552	-0.219984	-0.222371	-0.218239	-0.201719	-0.164115	-0.14161	-0.125712	-0.126383	-0.134243	-0.11325	-0.0673596	-0.0248325	0.0160809	0.0539583	0.0856991
PtK_GFP-tub_mCh-p50	200611_001_01b Autocorrelation	0.622682	0.253626	0.00243458	0.0788627	0.226818	0.258415	0.0688782	-0.0541955	-0.136302	-0.0416012	0.0782572	0.109271	0.0443642	0.00966098	0.0299203	0.0544803	0.0624532	-0.0436767	-0.0191775	0.0586202	0.0842228	0.035551	-0.0952843	-0.161964	-0.162397	-0.0934	0.0181886	0.0927643	0.0324179	-0.0443807	-0.0876102	-0.00543472	-0.00688382	-0.0593075	-0.199093	-0.260642	-0.253253	-0.183169	-0.117285	-0.147469	-0.186622	-0.181522	-0.0950833	-0.00326462	0.0176349	-0.0348862	-0.0713519	-0.0598279
PtK_GFP-tub_mCh-p50	200612_004_01a Autocorrelation	0.540815	0.222542	0.120869	0.186546	0.134475	0.0628103	-0.0507735	-0.0257104	0.06127	0.0737352	0.0989297	-0.0360279	-0.0482932	0.0616282	0.138973	-0.022555	-0.236274	-0.327129	-0.141682	-0.0402836	-0.130674	-0.202288	-0.150149	-0.115602	-0.111994	-0.0591872	-0.0507662	-0.0221645	-0.00127711	-0.0195077	-0.0602546	-0.14108	-0.142962	-0.0659605
PtK_GFP-tub_mCh-p50	200612_004_01b Autocorrelation	0.508297	0.256377	0.120849	0.0105139	-0.051338	-0.187986	-0.175378	-0.0431867	0.0844138	0.0598477	-0.0337476	-0.104053	-0.184324	-0.331105	-0.333109	-0.23742	-0.109372	-0.189755	-0.0306349	0.0947262	0.147027	0.0755459	-0.0335573	0.00194827	0.0399171	0.0299071	-0.0154854	-0.0669242	-0.00644945	0.0536894	0.0335461	0.053096	0.031777	0.032348
PtK_GFP-tub_mCh-p50	200612_004_02a Autocorrelation	0.161335	-0.510977	-0.13774	0.273263	0.0947487	-0.0718635	-0.121332	-0.137475	-0.0996469	0.0108753	0.0373508	0.00683386	-0.00537227
PtK_GFP-tub_mCh-p50	200612_004_02b Autocorrelation	0.136705	-0.0886994	0.00184848	-0.129118	0.0560614	0.00678696	-0.0137119	-0.0355625	-0.251117	-0.188959	0.0829333	0.0991282	-0.176295
PtK_GFP-tub_mCh-p50	200612_004_03a Autocorrelation	0.415747	-0.391032	-0.43795	-0.116224	0.0189469	0.0117217	-0.00120938
PtK_GFP-tub_mCh-p50	200612_004_03b Autocorrelation	0.179993	-0.376665	-0.433803	-0.213205	0.198377	0.26913	-0.123828
PtK_GFP-tub_mCh-p50	210122_009_01a Autocorrelation	0.569914	0.2789	0.131247	-0.0646138	0.0651186	0.0896012	-0.00126199	0.0239778	-0.0562847	-0.130742	0.0446744	0.163301	0.205704	0.0908632	-0.103483	-0.182231	-0.247855	-0.214538	-0.0519939	0.0499748	0.106259	0.0636042	-0.0411408	0.0661282	0.130237	0.0810197	0.0762241	-0.130994	-0.228168	-0.250126	-0.215043	-0.0593135	0.023473	-0.0121151	-0.0749621	-0.138566	-0.158758	-0.0802625	-0.107017	-0.121656	-0.146138	-0.19687	-0.150934	-0.0595659	0.0285209	0.111812	0.143362	0.101212
PtK_GFP-tub_mCh-p50	210122_009_01b Autocorrelation	0.688476	0.467463	0.227176	0.214334	0.3135	0.367768	0.357504	0.195144	0.00776668	-0.0781942	-0.0658699	-0.0049549	0.0239721	-0.0650775	-0.159178	-0.203355	-0.167702	-0.115889	-0.0704705	-0.103216	-0.144592	-0.187586	-0.199704	-0.136296	-0.163989	-0.195762	-0.228864	-0.247374	-0.220851	-0.181027	-0.136879	-0.103807	-0.116864	-0.0982818	-0.0739639	0.0203207	0.0480657	0.0165901	-0.0441283	-0.0682219	-0.0224094	0.0110281	0.108043	0.0721652	0.064735	-0.0127604	-0.0224308	-0.038622
PtK_GFP-tub_mCh-p50	210122_009_02a Autocorrelation	0.811213	0.700443	0.547839	0.453024	0.44409	0.464544	0.489814	0.445626	0.337686	0.238317	0.141018	0.0730921	0.0992758	0.140352	0.0745059	0.0598363	-0.0649712	-0.1058	-0.164654	-0.16462	-0.156692	-0.159338	-0.182611	-0.213701	-0.278425	-0.319828	-0.312953	-0.276463	-0.233123	-0.210091	-0.243546	-0.253335	-0.305343	-0.295635	-0.293767	-0.257305	-0.216423	-0.183533	-0.166951	-0.177047	-0.186372	-0.172165	-0.157375	-0.113367	-0.0879476	-0.0401785	-0.021277	-0.00303658
PtK_GFP-tub_mCh-p50	210122_009_02b Autocorrelation	0.426736	0.143534	0.0156031	-0.0944274	-0.0406367	-0.00423622	0.0193112	0.0618624	-0.166742	-0.185518	-0.10085	-0.0852873	0.055358	0.111797	-0.0382549	-0.0562317	-0.0967702	-0.0862413	-0.0127573	-0.103122	-0.126974	-0.0733485	-0.144296	-0.0474226	-0.0775628	-0.170148	-0.156213	-0.0480862	0.0256185	0.0979992	0.080712	0.160319	0.0788356	-0.0667752	0.0244438	0.0181893	0.0657741	0.0715727	0.0614706	0.027331	-0.0328871	-0.0207171	0.00880179	-0.0142913	-0.00199724	-0.00990668	0.00426299	0.00207674
PtK_GFP-tub_mCh-p50	210122_009_03a Autocorrelation	0.734733	0.53815	0.288974	0.1068	-0.0806573	-0.293331	-0.35903	-0.423048	-0.366749	-0.244888	-0.186668	-0.101311	-0.112975
PtK_GFP-tub_mCh-p50	210122_009_03b Autocorrelation	0.197343	0.113669	0.0183051	0.246272	0.13628	-0.319942	-0.0746804	-0.149058	-0.0339492	-0.261652	-0.242312	-0.109909	-0.0203656
PtK_GFP-tub_mCh-p50	210122_013_01a Autocorrelation	0.49447	0.307678	0.22132	0.0417341	-0.0276276	-0.00124778	-0.157527	-0.134826	-0.113207	-0.0777935	0.0305556	0.0455149	0.0376913	-0.0550353	-0.0909154	-0.132488	-0.123769	-0.125003	-0.0629185	-0.0111947	0.145409	0.140775	0.0654882	0.0993652	0.00188878	-0.029195	-0.0444809	-0.200969	-0.202716	-0.18445	-0.233544	-0.122983
PtK_GFP-tub_mCh-p50	210122_013_01b Autocorrelation	0.721006	0.526671	0.381749	0.259878	0.195185	0.0365625	-0.0426505	-0.0260472	-0.048465	-0.0438934	-0.0619907	-0.0813459	-0.100482	-0.152761	-0.116797	-0.118788	-0.0928058	-0.0698312	-0.112976	-0.0488478	-0.0601636	-0.0250752	0.0145798	-0.0223581	-0.118169	-0.21316	-0.232515	-0.203142	-0.188125	-0.204718	-0.163751	-0.0867701
Average Autocorrelation of P50		0.46635	0.154137	0.114163	0.142059	0.0960241	0.00425112	-0.0434345	-0.0285515	-0.0552422	-0.101196	-0.0815051	-0.0625342	-0.0797631	-0.0830399	-0.0966308	-0.0886996	-0.114781	-0.15675	-0.123354	-0.0760292	-0.0887687	-0.0881755	-0.108259	-0.105264	-0.111483	-0.114433	-0.103481	-0.0944389	-0.0813389	-0.0781998	-0.0697051	-0.0375005	-0.0443277	-0.0565995	-0.071484	-0.0730215	-0.065322	-0.0567386	-0.0575678	-0.0807055	-0.116802	-0.115748	-0.066633	-0.0309471	-0.000647747	0.00502687	0.0144206	0.0145835
Standard Deviation of Autocorrelation of P50		0.263205	0.398745	0.312658	0.25759	0.211864	0.237969	0.218868	0.218964	0.185387	0.174143	0.155498	0.141368	0.147325	0.14736	0.138448	0.126559	0.118634	0.114196	0.101901	0.134828	0.176591	0.163099	0.152466	0.13746	0.137149	0.143461	0.136228	0.125062	0.124057	0.118999	0.115124	0.115029	0.111457	0.0968805	0.108921	0.105946	0.120725	0.0893233	0.0773052	0.0737178	0.0729642	0.0889214	0.104427	0.0642087	0.0522838	0.056038	0.0752084	0.0654165
Standard Error of Autocorrelation of P50		0.0388074	0.0587918	0.0460989	0.0388332	0.0319397	0.0358752	0.0329955	0.0346212	0.0293123	0.0282497	0.0252252	0.022933	0.0252661	0.0269042	0.025277	0.0231063	0.0242161	0.0243466	0.0217254	0.0287455	0.0376494	0.0347728	0.032506	0.0293066	0.0292402	0.030586	0.0290439	0.0266633	0.026449	0.0253707	0.0245446	0.0245242	0.02557	0.022835	0.0291103	0.0283152	0.0348502	0.0257854	0.0244461	0.0260632	0.0297875	0.036302	0.0426323	0.0262131	0.0213448	0.0228774	0.0307037	0.0267062
p-value		0.00498079	0.0136538	5.79776e-06	6.91516e-07	0.00201836	0.696685	0.382889	0.00951787	0.0864632	0.597782	0.638907	0.83838	0.523605	0.27306	0.141208	0.851693	0.44933	0.238402	0.0952243	0.600043
[truncated: 6 more columns]
