# Supplementary material for: Kinetochore-fiber lengths are maintained locally but coordinated globally by poles in the mammalian spindle
Source: eLife. 2023 Jul 3;12:e85208. doi: 10.7554/eLife.85208 (PMC10348741; doi:10.7554/eLife.85208)
Supplement: Figure 2—source data 1. [file elife-85208-fig2-data1.xlsx]

## Sheet: Raw-2C
Condition	# K-fiber_ID	[Time after ablation (min)] [Length (µm)]
PtK_GFP-tub	220329_002_02a	[-2.4	-1.6	-0.6	0.4	1.4	2.4	3.4	4.4	5.4]	[6.38	5.015	4.805	5.855	6.59	5.75	5.12	5.015	5.75]
PtK_GFP-tub	220329_002_03b	[-2.4	-1.6	-0.6	0.4	1.4	2.4]	[4.07	4.28	5.33	5.96	7.01	8.584999999999999]
PtK_GFP-tub	220329_002_01a_abl1	[-2.4	-2.2	-2	-1.8	-1.6	-1.4	-1.2	-1	-0.8	-0.6	-0.4	-0.2	0	0.2	0.4	0.6	0.8	1	1.2	1.4	1.6	1.8	2	2.2	2.4	2.6	2.8	3	3.2	3.4	3.6	3.8	4	4.2	4.4	4.6	4.8	5.0]	[6.065	6.065	6.275	6.065	5.96	6.38	6.065	6.695	7.01	7.22
PtK_GFP-tub	220329_002_02b	[-2.4	-1.6	-0.6	0.4	1.4]	[7.325	8.27	8.795	8.795	8.479999999999999]
PtK_GFP-tub	220324_024_02a	[-1.8	-1	0	1	2	3	4	5	6	7	8	9	10	11	12	13	14	15	16	17	18	19	20	20.6	21.6	22.6	23.6	24.6	25.6	26.6	27.6	28.6	29.6	30.6	31.6	32.6	34.6	35.6]	[7.64	7.85	7.64	7.64	8.06	7.535	8.06	8.06	6.59	6.695
PtK_GFP-tub	220324_024_04a	[-1.8	-1	0	1	2	3	4	5	6	7	8	9	10	11	12	13	14	15	16	20.6	21.6	22.6	23.6	24.6	25.6	26.6	27.6	28.6	29.6	30.6	31.6]	[9.215	10.265	8.165	7.22	5.96	5.225	6.695	5.96	6.17	5.645	5.855	5.855	7.01	6.17	7.43	5.75	6.59
PtK_GFP-tub	220324_024_01a_abl1	[-1.8	-1.6	-1.4	-1.2	-1	-0.8	-0.6	-0.4	-0.2	0	0.2	0.4	0.6	0.8	1	1.2	1.4	1.6	1.8	2	2.2	2.4	2.6	2.8	3	3.2	3.4	3.6	3.8	4	4.2	4.4	4.6	4.8	5	5.2	5.4	5.6	5.8	6	6.2	6.4	6.6	6.8	7	7.2	7.4	7.6
PtK_GFP-tub	220324_024_03a	[-1.8	-1	0	1	1.8	2	3	4	5	6	7	8.0]	[7.64	8.06	7.115	6.695	7.01	7.115	6.905	6.905	7.535	7.745	6.905	6.905]
PtK_GFP-tub	181120_003_02b	[-1.8171666666666666	-1.14733	-0.3045	0.2525	0.670833	1.10483	1.5228333333333335]	[7.114999999999999	7.955	6.59	7.955	7.64	8.48	8.374999999999998]
PtK_GFP-tub	181120_003_01b	[-1.8171666666666666	-1.14733	-0.3045	0.2525	0.670833	1.10483	1.52283	1.941	2.35983	2.7781666666666665]	[6.8	6.38	7.01	7.22	6.59	6.8	7.01	6.695	6.905	6.485]
PtK_GFP-tub	181120_003_03a	[-1.8171666666666666	-1.14733	-0.3045	0.2525	0.670833	1.10483	1.52283	1.941	2.35983	2.77817	3.23767	3.65533	4.0735	4.908333333333333]	[7.22	6.905	7.01	6.17	6.275	6.8	6.59	5.855	6.275	7.115	6.905	7.22	7.325	7.01]
PtK_GFP-tub	181120_003_02a	[-1.8171666666666666	-1.14733	-0.3045	0.2525	0.670833	1.10483	1.52283	1.941	2.35983	2.77817	3.23767	3.65533	4.0735	4.741666666666666]	[6.8	6.17	6.275	6.17	6.59	6.275	6.905	6.38	6.59	7.325	7.325	7.325	7.535	6.905]
PtK_GFP-tub	181120_003_03b	[-1.8171666666666666	-1.14733	-0.3045	0.2525	0.670833	1.10483	1.52283	1.941	2.35983	2.77817	3.23767	3.65533	4.0735	4.741666666666666]	[8.69	8.48	8.9	8.585	8.48	8.375	7.955	7.955	8.06	8.27	8.27	8.165	7.01	7.325]
PtK_GFP-tub	181120_003_01a_abl1	[-1.8171666666666666	-1.64967	-1.48233	-1.3145	-1.14733	-0.9805	-0.806333	-0.639667	-0.471333	-0.3045	-0.137333	0	0.085	0.169	0.2525	0.336	0.419333	0.503333	0.587167	0.670833	0.754	0.838833	0.922167	1.00617	1.10483	1.18767	1.27117	1.35517	1.43833	1.52283	1.60633	1.69	1.7735	1.8575	1.941	2.02517	2.10833	2.19267	2.27617	2.35983	2.4435	2.52733	2.61067	2.695	2.86183	2.94517	3.02933	3.15433
PtK_GFP-tub	181206_001_02a	[-3.3003333333333336	-2.922	-2.50267	-1.995	-1.57667	-1.1585	-0.490667	0.168167	0.920167	1.75633	2.59283	3.43433	3.854	4.44	5.28167	5.701]	[6.59	7.01	7.535	7.955	7.745	7.85	7.64	7.535	8.27	7.22	7.01	6.8	6.275	6.275	6.38	6.17]
PtK_GFP-tub	181206_001_01b_abl2	[-3.3003333333333336	-3.21367	-3.12567	-3.014	-2.922	-2.8385	-2.75517	-2.67033	-2.58583	-2.50267	-2.41817	-2.33467	-2.25067	-2.0785	-1.995	-1.91133	-1.828	-1.74417	-1.66067	-1.57667	-1.49317	-1.40917	-1.326	-1.24283	-1.1585	-1.07483	-0.991667	-0.8245	-0.657833	-0.490667	-0.323	-0.155667	0	0.0836667	0.168167	0.252	0.418667	0.585333	0.752667	0.920167	1.08683	1.254	1.422	1.58883	1.75633	1.923	2.08983	2.25767
PtK_GFP-tub	181206_001_03a	[-3.3003333333333336	-2.922	-2.50267	-1.995	-1.57667	-1.1585	-0.490667	0.168167	0.920167	1.75633	2.59283	3.43433	3.854	4.44	5.28167	5.701]	[6.485	6.695	6.275	5.435	4.805	4.7	5.015	6.065	6.275	5.12	3.86	5.75	6.485	7.43	7.43	7.325]
PtK_GFP-tub	181206_001_02b	[-3.3003333333333336	-2.922	-2.50267	-1.995	-1.57667	-1.1585	-0.490667	0.168167	0.920167	1.75633	2.59283	3.43433	3.854	4.44	5.28167	5.785]	[8.899999999999999	9.425	8.69	8.48	8.375	8.69	8.48	8.27	6.485	7.115	7.115	7.43	7.535	7.85	6.905	8.165]
PtK_GFP-tub	200218_006_02a	[-1.4041666666666666	-1.203	-0.2	0.8015	1.8025	2.80367	3.80467	4.8055	5.80667	7.00767	7.80867	8.8095	9.8105]	[9.319999999999999	8.9	8.69	8.375	7.43	7.745	8.165	9.11	9.32	8.795	7.64	7.535	8.059999999999999]
PtK_GFP-tub	200218_006_04b	[-3.1511666666666667	-2.284	-1.203	-0.2	0.8015	1.8025	2.80367	3.80467	4.8055	5.00567	5.80667	6.00667	6.80767	7.80867	8.809500000000002]	[7.534999999999999	7.22	7.85	7.43	7.43	8.06	8.27	7.43	7.01	7.01	6.59	6.485	6.275	5.96	5.75]
PtK_GFP-tub	200218_006_05a	[4.805499999999999	5.80667	6.80767	7.80867	8.8095	9.8105]	[5.54	6.905	5.96	7.325	6.905	6.59]
PtK_GFP-tub	200218_006_03b	[-0.2	0.8015	1.8025	2.80367	3.80467	4.8055	5.80667	6.80767	7.80867	8.8095	9.8105]	[10.055	9.53	9.005	8.27	9.11	9.32	9.11	8.27	8.795	9.11	9.53]
PtK_GFP-tub	200218_006_02b	[-3.1511666666666667	-2.284	-1.203	-0.2	0.8015	1.8025	2.80367	3.80467	4.8055	5.80667	6.80767	7.80867	8.8095	9.8105]	[8.479999999999999	8.27	8.375	7.64	8.69	9.11	8.375	7.955	8.375	7.745	9.005	9.32	9.005	9.004999999999999]
PtK_GFP-tub	200218_006_01a_abl2	[-3.1511666666666667	-2.9475	-2.74367	-2.54267	-2.284	-2.0835	-1.88367	-1.60533	-1.40417	-1.203	-1.00133	-0.805167	-0.600833	-0.400667	-0.2	0	0.200333	0.401833	0.601833	0.8015	1.00167	1.19833	1.40217	1.60217	1.8025	2.00267	2.203	2.403	2.60333	2.80367	3.00383	3.20017	3.404	3.6045	3.80467	4.00467	4.20483	4.40533	4.60533	4.8055	5.00567	5.20217	5.40633	5.60617	5.80667	6.00667	6.20717	6.40733
PtK_GFP-tub	200218_006_03a	[-3.1511666666666667	-2.284	-1.203	-0.2	0.8015	1.8025	2.80367	5.80667	6.80767	7.80867	8.8095	9.8105]	[9.11	9.005	8.69	8.9	8.27	8.585	8.48	7.85	7.64	7.745	6.905	6.8]
PtK_GFP-tub	220324_024_02a_abl2	[-10.4	-10.2	-10	-9.8	-9.6	-9.4	-9.2	-9	-8.8	-8.6	-8.4	-8.2	-8	-7.8	-7.6	-7.4	-7.2	-7	-6.8	-6.6	-6.4	-6.2	-6	-5.8	-5.6	-5.4	-5.2	-5	-4.8	-4.6	-4.4	-4.2	-4	-3.8	-3.6	-3.4	-3.2	-3	-2.8	-2.6	-2.4	-2.2	-2	-1.8	-1.6	-1.4	-1.2	-1
PtK_GFP-tub	191112_002_01b_abl2	[-11.140166666666666	-10.1372	-9.13167	-8.13083	-7.1295	-6.129	-5.12717	-4.12733	-3.12633	-2.3255	-2.07383	-2.00667	-1.93933	-1.87217	-1.80467	-1.73717	-1.66983	-1.6035	-1.40233	-1.202	-1.002	-0.801667	-0.601333	-0.401167	-0.200667	0	0.0676667	0.134333	0.201833	0.2695	0.336667	0.404167	0.471333	0.538833	0.605833	0.673167	0.739667	0.940833	1.1405	1.341	1.5425	1.7425	1.943	2.1435	2.34367	2.5455	2.74567	2.946
PtK_GFP-tub	191112_002_03a	[-2.006666666666667	-1.80467	-1.202	-0.200667	0.2695	0.605833	1.341	2.34367	3.3465	5.46867	6.05433	6.3919999999999995]	[5.75	6.38	6.485	6.17	5.855	5.855	6.17	7.955	7.115	4.49	5.855	6.275]
PtK_GFP-tub	191112_002_02b	[-11.140166666666666	-7.1295	-2.3255	-1.80467	-1.202	-0.200667	0.2695	0.605833	1.341	2.34367	3.3465	5.468666666666667]	[4.7	6.38	7.01	7.64	8.27	9.215	8.9	7.955	7.115	5.855	8.06	9.319999999999999]
PtK_GFP-tub	191112_002_02a	[-11.140166666666666	-7.1295	-2.3255	-1.80467	-1.202	-0.200667	0.2695	0.605833	1.341	2.34367	3.3465	5.468666666666667]	[5.645	6.17	8.27	8.165	7.325	7.43	8.48	8.69	8.9	9.635	8.06	6.485]
PtK_GFP-tub	200903_001_02a	[-1.0156666666666667	-0.200333	0.803	1.80533	2.80817	3.8115	4.8155	5.819	6.82133	7.82617	8.82983	9.84083	10.8398	11.8443	12.848166666666666]	[7.114999999999999	7.22	6.275	6.485	6.59	7.01	7.01	7.325	7.22	7.745	8.27	7.01	6.8	6.485	6.38]
PtK_GFP-tub	200903_001_01b_abl1	[-1.0156666666666667	-0.8055	-0.601	-0.400833	-0.200333	0	0.200167	0.401333	0.602	0.803	1.00383	1.19983	1.40383	1.6045	1.80533	2.00633	2.20717	2.40717	2.60783	2.80817	3.009	3.20533	3.41	3.61017	3.8115	4.01233	4.21333	4.41417	4.61467	4.8155	5.01567	5.214	5.41817	5.618	5.819	6.019	6.21967	6.4205	6.62067	6.82133	7.022	7.21967	7.42433	7.62517	7.82617	8.0275	8.22833	8.429
PtK_GFP-tub	200903_001_03a	[-1.0156666666666667	-0.200333	0.803	1.80533	2.80817	3.8115	4.8155	5.819	7.82617	8.82983	9.84083	10.8398	11.844333333333333]	[7.64	7.745	6.695	6.38	7.22	7.85	7.43	7.85	8.165	7.115	5.645	5.015	5.855]
PtK_GFP-tub	200903_001_02b	[-1.0156666666666667	-0.200333	0.803	1.80533	2.80817	3.8115	4.8155	5.819	6.82133	7.82617	8.82983	9.84083	10.0352	10.8398	11.8443	12.848166666666666]	[8.899999999999999	8.69	8.69	7.64	7.64	6.59	7.325	7.325	8.06	8.165	9.215	6.695	5.855	6.8	7.22	7.745]
PtK_GFP-tub_mCh-p50	220331_005_01b_abl2	[-7.2	-7	-6.8	-6.6	-6.4	-6.2	-6	-5.8	-5.6	-5.4	-5.2	-5	-4.8	-4.6	-4.4	-4.2	-4	-3.8	-3.6	-3.4	-3.2	-3	-2.8	-2.6	-2.4	-2.2	-2	-1.8	-1.6	-1.4	-1.2	-1	-0.8	-0.6	-0.4	-0.2	0	0.2	0.4	0.6	0.8	1	1.2	1.4	1.6	1.8	2	2.2
PtK_GFP-tub_mCh-p50	220331_005_04b	[-7.2	-6.4	-5.4	-4.4]	[10.08	7.98	6.825	5.88]
PtK_GFP-tub_mCh-p50	220331_005_02a	[-7.2	-6.4	-5.4	-4.4	-3.4	-2.4	-1.4	-0.4	0.6	1.6	2.6]	[3.78	2.835	3.885	4.095	3.465	2.31	2.94	2.52	3.675	2.835	2.1]
PtK_GFP-tub_mCh-p50	220331_005_03b	[-7.2	-6.4	-5.4	-3.4	-2.4	-1.4	-0.6	-0.4	0.6	1.6	2.6	3.6	3.8	4.8	5.8	6.8	7.8	8.8	9.8	10.8	11.8	12.8	13.8	14.8	15.8	16.8	17.8	18.8	19.8	20.8	21.8	22.8	23.8]	[7.56	5.775	5.67	3.675	4.41	3.465	4.095	4.2	4.41	5.25	3.675	3.465	6.51	5.565	5.565
PtK_GFP-tub_mCh-p50	220331_005_05a	[13.8	14.8	15.8	16.8	17.8]	[3.675	3.675	3.045	3.885	4.095]
PtK_GFP-tub_mCh-p50	220331_005_02b	[-7.2	-6.4	-5.4	-4.4	-3.4	3.8	4.8	5.8	6.8	7.8	8.8	9.8	10.8	11.8]	[5.7749999999999995	5.985	6.615	6.3	5.88	7.77	7.35	6.3	5.985	5.985	7.35	7.455	6.09	6.51]
PtK_GFP-tub_mCh-p50	220331_005_05b	[13.8	14.8	15.8	16.8	17.8]	[2.835	2.73	3.045	3.36	2.94]
PtK_GFP-tub_mCh-p50	220401_005_03a	[-3.6	-2.8	-1.8	-0.8	0.2	1.2	2.2	3.2	5.6	6.2	7.2	8.2	9.2	10.2	11.2	12.2	12.6	12.8	12.8	13.8	14.8	15.8	16.8	17.8	18.8	19.8	20.8	21.8	22.8	23.8	24.8	25.8	26.8	27.8	28.8	29.8	30.8]	[2.835	4.2	3.045	2.835	2.415	2.415	2.94	2.625	2.415	3.465	3.57
PtK_GFP-tub_mCh-p50	220401_005_02b	[0.4	0.8	1.2	12.8	12.8	13.8	14.8	15.8	16.8	17.8	18.8	19.8	20.8	21.8	22.8	25.8	26.8	27.8	28.8]	[5.25	5.355	5.355	5.145	6.09	6.615	6.3	5.88	5.775	5.775	5.04	4.935	4.2	5.145	3.465	3.36	3.15	2.205	2.205]
PtK_GFP-tub_mCh-p50	220401_005_03b	[0.4	1.2	2.2	3.2	9.2	10.2	11.2	12.4	12.6	12.8	12.8	13.8	14.8	15.8	16.8	17.8	18.8	19.8	20.8	21.8	22.8	23.8	24.8	25.8	26.8	27.8	28.8	29.8	30.8]	[7.245	6.93	4.62	3.99	6.72	6.615	7.035	7.77	6.93	6.51	6.09	4.725	4.305	4.83	4.305	4.2	3.78	3.99	3.78
PtK_GFP-tub_mCh-p50	220401_005_01b_abl1	[-3.6	-3.4	-3.2	-3	-2.8	-2.6	-2.4	-2.2	-2	-1.8	-1.6	-1.4	-1.2	-1	-0.8	-0.6	-0.4	-0.2	0	0.2	0.4	0.6	0.8	1	1.2	1.4	1.6	1.8	2	2.2	2.4	2.6	2.8	3	3.2	3.4	3.6	3.8	4	4.2	4.4	4.6	4.8	5	5.2	5.4	5.6	5.8
PtK_GFP-tub_mCh-p50	220401_005_02a	[-3.6	-2.8	-1.8	-0.8	0.2	1.2	2.2	3.2	4.2	5.2	6.2	7.2	8.2	9.2	10.2	11.2	12.2	12.6	12.8	12.8	13.8	14.8	15.8	16.8	17.8	18.8	19.8	20.8	21.8	22.8	23.8	24.8	25.8	26.8	27.8	28.8	29.8	30.8]	[5.25	4.095	4.095	4.41	3.255	4.095	4.305	3.675	3.045	3.36
PtK_GFP-tub_mCh-p50	220401_005_04b	[-3.6	-2.8	-1.8	-0.8	-0.6	-0.4	0.8]	[5.88	6.405	6.405	7.35	7.455	7.665	7.77]
PtK_GFP-tub_mCh-p50	220328_015_01b_abl1	[-2.2	-2	-1.8	-1.6	-1.4	-1.2	-1	-0.8	-0.6	-0.4	-0.2	0	0.2	0.4	0.6	0.8	1	1.2	1.4	1.6	1.8	2	2.2	2.4	2.6	2.8	3	3.2	3.4	3.6	3.8	4	4.2	4.4	4.6	4.8	5	5.2	5.4	5.6	5.8	6	6.2	6.4	6.6	6.8	7	7.2
PtK_GFP-tub_mCh-p50	220329_019_02b	[-4.4	-0.6	0.4	1.4	2.4	3.4	4.4	5.4	6.4	7.4	8.4	9.4	10.4	10.8	11.8	12.8	13.8	14.8	15.8	16.8	19.8	20.8	21.8	22.8	23.8	24.8	25.8	26.8	27.8]	[10.709999999999999	6.3	5.355	5.355	4.515	3.675	4.2	4.305	5.775	7.35	8.085	7.56	8.61	8.19	8.505	7.98	7.77	6.825	7.77
PtK_GFP-tub_mCh-p50	220329_019_02a	[-4.4	1.2	1.4	2.4	3.4	7.4	8.4	9.4	10.4	10.6	10.8	11.8	12.8	13.8	14.8	15.8	16.8	19.8	20.8	21.8	22.8	23.8	24.8]	[3.15	3.36	3.675	3.465	3.78	4.41	4.62	5.04	5.04	5.565	7.245	4.2	3.78	4.305	3.99	2.835	2.625	3.255	3.255	2.31	2.94	3.045	2.73]
PtK_GFP-tub_mCh-p50	220329_019_01b_abl1	[-4.4	-4.2	-4	-3.8	-3.6	-3.4	-3.2	-3	-2.8	-2.6	-2.4	-2.2	-2	-1.8	-1.6	-1.4	-1.2	-1	-0.8	-0.6	-0.4	-0.2	0	0.2	0.4	0.6	0.8	1	1.2	1.4	1.6	1.8	2	2.2	2.4	2.6	2.8	3	3.2	3.4	3.6	3.8	4	4.2	4.4	4.6	4.8	5
PtK_GFP-tub_mCh-p50	220328_009_03a	[-4.8	-4	-3	-2	-1	0	2.2	3	17	18	19	19.8	20	21	22	23	24	25	26	27	28	29	30	31	32	33	34	35	36	37	38	39	40.0]	[4.095	5.25	4.935	6.3	6.09	5.775	6.72	8.19	7.455	6.195	6.09	6.3	7.245	8.085	8.295
PtK_GFP-tub_mCh-p50	220328_009_04a	[-4.6	-4	-3	-2	-1	0	1	2	9.8	10	11	12	13	14	15	16	17	18	19.2	19.8	20	21	22	23	24	25	26	27	28	29	30	31	32	33	34	35	36	37.0]	[6.825	6.615	6.51	7.56	7.665	6.195	6.51	7.35	6.195	6.93
PtK_GFP-tub_mCh-p50	220328_009_02b	[-4.6	-4	-3	-2	-1	0	1	2	8.8	9	10	11	12	13	14	15	16	17	18	19	19.8	20	21	22	23	24	25	26	27	28	29	30	31	32	33	34	35	36	37	38	39	40.0]	[5.88	6.51	7.035	7.35	5.88	3.675
PtK_GFP-tub_mCh-p50	220328_009_03b	[2.2	3	4	5	6	7	8	18	19	19.8	20	21	22	23	24	25	26	27	28	29	30	31	32	33	34	35	36	37	38	39	40.0]	[7.9799999999999995	6.825	6.72	6.09	8.19	7.98	7.665	8.4	7.35	7.455	7.14	6.09	5.775	6.72	7.35	8.19	8.82
PtK_GFP-tub_mCh-p50	220328_009_01b_abl1	[-4.8	-4.6	-4.4	-4.2	-4	-3.8	-3.6	-3.4	-3.2	-3	-2.8	-2.6	-2.4	-2.2	-2	-1.8	-1.6	-1.4	-1.2	-1	-0.8	-0.6	-0.4	-0.2	0	0.2	0.4	0.6	0.8	1	1.2	1.4	1.6	1.8	2	2.2	2.4	2.6	2.8	3	3.2	3.4	3.6	3.8	4	4.2	4.4	4.6
PtK_GFP-tub_mCh-p50	220328_009_04b	[-4.6	-4	-3	-2	-1	0	1	2	3	4	5	12.2	13	14	15	16	17	18	18.2	19	19.8	20	21	22	23	24	25	26	27	28	29	30	31	32	33	34	35	36	37	38	39	40.0]	[4.515	5.46	4.725	4.41	4.935	4.41
PtK_GFP-tub_mCh-p50	220328_009_02a	[-4.6	-4	-3	-2	-1	0	1	16.6	17	18	19	19.8	20	21	22	23	24	25	26	27	28	29	30	31	32	33	34	35	36	37	38	39	40.0]	[4.305	3.885	3.78	4.41	4.725	6.09	6.09	6.09	6.3	6.93	6.51	6.09	5.775	5.46	5.775
PtK_GFP-tub_mCh-p50	220401_005_01b_abl2	[-8.2	-8	-7.8	-7.6	-7.4	-7.2	-7	-6.8	-6.6	-6.4	-6.2	-6	-5.8	-5.6	-5.4	-5.2	-5	-4.8	-4.6	-4.4	-4.2	-4	-3.8	-3.6	-3.4	-3.2	-3	-2.8	-2.6	-2.4	-2.2	-2	-1.8	-1.6	-1.4	-1.2	-1	-0.8	-0.6	-0.4	-0.2	0	0.2	0.4	0.6	0.8	1	1.2
PtK_GFP-tub_mCh-p50	220323_012_01b_abl2	[-4.6	-4.4	-4.2	-4	-3.8	-3.6	-3.4	-3.2	-3	-2.8	-2.6	-2.4	-2.2	-2	-1.8	-1.6	-1.4	-1.2	-1	-0.8	-0.6	-0.4	-0.2	0	0.2	0.4	0.6	0.8	1	1.2	1.4	1.6	1.8	2	2.2	2.4	2.6	2.8	3	3.2	3.4	3.6	3.8	4	4.2	4.4	4.6	4.8
PtK_GFP-tub_mCh-p50	220323_012_02a	[-4.6	-3.8	-3.4	-2.4	-1.8	2	2.2	3.2	4.2	5.2	6.2	7.2	8	8.2	9	9.2	16.4	17.4	18.4	19.4	20.4	21.4	22.4	23.4	24.4	25.4	26.4	27.4]	[3.045	2.835	3.36	2.94	3.99	4.41	4.725	4.62	4.095	5.67	4.83	4.725	4.83	4.305	4.935	5.145	3.885	3.885	3.57	2.94
PtK_GFP-tub_mCh-p50	220323_012_03a	[-4.6	-3.8	-2.8	-1.8	-0.8]	[4.41	5.775	4.2	5.46	5.04]
PtK_GFP-tub_mCh-p50	220323_012_02b	[-4.6	-3.8	-2.8	-1.8	7.2	8.2	9.2	10.2	16.4	17.4	18.4	19.4	20.4	21.4	22.4	23.4	24.4	25.4	26.4	27.4]	[4.725	6.51	7.14	6.825	2.73	3.36	2.415	1.89	3.465	2.73	2.73	4.2	3.885	2.31	2.205	3.15	3.36	2.835	2.415	2.31]
PtK_GFP-tub_mCh-p50	181206_005_03b	[-6.633333333333334	-5.96667	-5.31667	-4.9	-4.46667	-3.05	-2.48333	-2.05	-1.63333	-1.21667	-0.75	-0.333333	0.0833333	0.5	1.35	2.18333	3.18333	3.85	4.68333	5.51667	6.51667	7.18333	8.01667	8.85	9.68333	10.5167	11.3667	12.2	13.0333	13.8667	14.7167	15.2	15.616666666666667]	[4.515	5.46	5.985	5.145	4.41	3.99	4.305	2.94	4.725	3.885	4.095	4.41	4.2	3.465	3.255
PtK_GFP-tub_mCh-p50	181206_005_05a	[3.85	4.68333	5.51667	6.35	7.18333	8.01667	8.85	9.68333	10.5167	11.3667	12.2	13.0333	13.8667	14.7167	15.2	15.6167	16.2833	16.7	17.3667	17.7833	18.45	18.95	19.5333	20.1167	20.616666666666667]	[2.94	3.255	3.57	2.94	3.045	3.255	3.78	4.935	5.775	5.67	5.355	5.88	5.985	5.985	5.985	7.245	7.14	6.72	6.825	6.615	8.4	7.35	8.19
PtK_GFP-tub_mCh-p50	181206_005_04b	[19.283333333333335	19.5333	20.116666666666667]	[4.83	4.515	4.2]
PtK_GFP-tub_mCh-p50	181206_005_02a	[-6.633333333333334	-6.46667	-6.3	-6.13333	-5.96667	-5.8	-5.63333	-5.48333	-5.4	-5.31667	-5.23333	-5.15	-5.06667	-4.98333	-4.9	-4.81667	-4.71667	-4.63333	-4.55	-4.46667	-4.38333	-4.3	-3.21667	-3.13333	-3.05	-2.91667	-2.83333	-2.65	-2.58333	-2.48333	-2.4	-2.31667	-2.23333	-2.15	-2.05	-1.96667	-1.88333	-1.8	-1.71667	-1.63333	-1.55	-1.46667	-1.38333	-1.3	-1.21667	-1.08333	-1	-0.916667
PtK_GFP-tub_mCh-p50	181206_005_03a	[-6.633333333333334	-5.96667	-5.31667	-4.9	-4.46667	-3.05	-2.48333	-2.05	-1.63333	-1.21667	-0.75	-0.333333	0.0833333	0.5	1.35	2.18333	3.01667	3.85	4.68333	5.51667	6.35	7.18333	8.01667	8.85	9.68333	10.5167	11.3667	12.2	13.033333333333333]	[3.78	3.15	2.205	2.31	2.31	2.73	2.73	2.73	2.31	2.31	2.31	2.31	3.045	3.99	3.15	3.57	3.57	3.36	2.835
PtK_GFP-tub_mCh-p50	181206_005_01a_abl3	[-6.633333333333334	-6.46667	-6.3	-6.13333	-5.96667	-5.8	-5.63333	-5.48333	-5.4	-5.31667	-5.23333	-5.15	-5.06667	-4.98333	-4.9	-4.81667	-4.71667	-4.63333	-4.55	-4.46667	-4.38333	-4.3	-3.21667	-3.13333	-3.05	-2.91667	-2.83333	-2.65	-2.58333	-2.48333	-2.4	-2.31667	-2.23333	-2.15	-2.05	-1.96667	-1.88333	-1.8	-1.71667	-1.63333	-1.55	-1.46667	-1.38333	-1.3	-1.21667	-1.08333	-1	-0.916667
PtK_GFP-tub_mCh-p50	181206_005_05b	[8.016666666666667	8.85	9.68333	10.5167	11.3667	12.2	13.0333	13.8667	14.7167	15.2	15.616666666666667]	[4.935	4.305	5.88	6.615	7.35	6.825	6.3	6.09	6.825	5.67	3.15]
PtK_GFP-tub_mCh-p50	181206_005_04a	[-6.633333333333334	-5.96667	-5.31667	-4.9	-4.46667	-3.05	-2.48333	-2.05	-1.63333	-1.08333	-0.75	-0.333333	0.0833333	0.5	1.35	2.18333	3.01667	3.85	4.68333	5.51667	6.35]	[5.984999999999999	6.72	6.615	7.035	6.825	7.665	6.3	5.46	4.935	5.145	5.46	5.88	6.3	6.615	6.195	6.3	5.67	5.25	4.83	5.46	5.145]
PtK_GFP-tub_mCh-p50	181206_005_01b	[-6.633333333333334	-6.46667	-6.3	-6.13333	-5.96667	-5.8	-5.63333	-5.48333	-5.4	-5.31667	-5.23333	-5.15	-5.06667	-4.98333	-4.9	-4.81667	-4.71667	-4.63333	-4.55	-4.46667	-4.38333	-4.3	-3.21667	-3.13333	-3.05	-2.91667	-2.83333	-2.65	-2.58333	-2.48333	-2.4	-2.31667	-2.23333	-2.15	-2.05	-1.96667	-1.8833333333333333]	[4.725	5.355	5.88	5.775	5.985	6.09	5.88	6.615	6.405	6.72	6.405
PtK_GFP-tub_mCh-p50	181206_005_02b	[-6.633333333333334	-6.46667	-6.3	-6.13333	-5.96667	-5.8	-5.63333	-5.48333	-5.4	-5.31667	-5.23333	-5.15	-5.06667	-4.98333	-4.9	-4.81667	-4.71667	-4.63333	-4.55	-4.46667	-4.38333	-4.3	-3.21667	-3.13333	-3.05	-2.91667	-2.83333	-2.65	-2.58333	-2.48333	-2.4	-2.31667	-2.23333	-2.15	-2.05	-1.96667	-1.88333	-1.8	-1.71667	-1.63333	-1.21667	-0.75	-0.333333	0.0833333	0.5	1.35	2.18333	2.35
[truncated: 354 more columns]

## Sheet: 2D
Condition	Time after ablation (min)	-10	-9	-8	-7	-6	-5	-4	-3	-2	-1	0	1	2	3	4	5	6	7	8	9	10	11	12	13	14	15	16	17	18	19	20	21	22	23	24	25	26	27	28	29
PtK_GFP-tub_ablate	Mean length	8.7635	8.081	7.808	7.9865	6.7055	7.766	7.6295	6.933	7.24027	6.84572	3.06269	4.26108	5.10018	6.00547	6.94329	6.74657	6.36525	6.62675	7.36	7.5525	8.081	7.50087	8.417	8.333	8.291	8.06	7.892	7.346	7.724	7.934	8.2	nan	nan	nan	nan	nan	nan	nan	nan	nan
PtK_GFP-tub_ablate	SD	1.0815	1.029	0.882	0.8085	0.5355	0.504	0.528454	1.0499	1.0956	1.07621	1.03586	1.10915	1.23311	1.35448	1.1809	0.69193	0.55543	0.677779	0.570317	0.940804	0.168	0.832125	0	0	0	0	0	0	0	0	0	nan	nan	nan	nan	nan	nan	nan	nan	nan
PtK_GFP-tub_ablate	Upper bound	9.845	9.11	8.69	8.795	7.241	8.27	8.15795	7.9829	8.33588	7.92193	4.09855	5.37024	6.33329	7.35995	8.12419	7.4385	6.92068	7.30453	7.93032	8.4933	8.249	8.333	8.417	8.333	8.291	8.06	7.892	7.346	7.724	7.934	8.2	nan	nan	nan	nan	nan	nan	nan	nan	nan
PtK_GFP-tub_ablate	Lower bound	7.682	7.052	6.926	7.178	6.17	7.262	7.10105	5.8831	6.14467	5.7695	2.02683	3.15193	3.86707	4.65099	5.76239	6.05464	5.80982	5.94897	6.78968	6.6117	7.913	6.66875	8.417	8.333	8.291	8.06	7.892	7.346	7.724	7.934	8.2	nan	nan	nan	nan	nan	nan	nan	nan	nan
PtK_GFP-tub_nonablated	Mean length	8.7635	8.081	7.808	7.9865	6.7055	7.766	7.6295	6.933	7.24027	6.84572	3.06269	4.26108	5.10018	6.00547	6.94329	6.74657	6.36525	6.62675	7.36	7.5525	8.081	7.50087	8.417	8.333	8.291	8.06	7.892	7.346	7.724	7.934	8.2	nan	nan	nan	nan	nan	nan	nan	nan	nan
PtK_GFP-tub_nonablated	SD	1.0815	1.029	0.882	0.8085	0.5355	0.504	0.528454	1.0499	1.0956	1.07621	1.03586	1.10915	1.23311	1.35448	1.1809	0.69193	0.55543	0.677779	0.570317	0.940804	0.168	0.832125	0	0	0	0	0	0	0	0	0	nan	nan	nan	nan	nan	nan	nan	nan	nan
PtK_GFP-tub_nonablated	Upper bound	9.845	9.11	8.69	8.795	7.241	8.27	8.15795	7.9829	8.33588	7.92193	4.09855	5.37024	6.33329	7.35995	8.12419	7.4385	6.92068	7.30453	7.93032	8.4933	8.249	8.333	8.417	8.333	8.291	8.06	7.892	7.346	7.724	7.934	8.2	nan	nan	nan	nan	nan	nan	nan	nan	nan
PtK_GFP-tub_nonablated	Lower bound	7.682	7.052	6.926	7.178	6.17	7.262	7.10105	5.8831	6.14467	5.7695	2.02683	3.15193	3.86707	4.65099	5.76239	6.05464	5.80982	5.94897	6.78968	6.6117	7.913	6.66875	8.417	8.333	8.291	8.06	7.892	7.346	7.724	7.934	8.2	nan	nan	nan	nan	nan	nan	nan	nan	nan
PtK_GFP-tub_mCh-p50_ablate	Mean length	nan	4.935	5.313	6.398	6.06044	7.31218	7.432	6.7725	6.7169	6.22519	2.58154	2.34194	2.48194	2.94787	3.85525	4.26519	4.33913	4.11031	4.32731	4.56487	4.42969	4.51806	4.75694	5.51469	5.55562	5.55856	5.26662	5.45971	5.60787	5.57521	5.63719	6.03	6.12	6.435	5.74	5.215	5.215	5.565	5.754	5.502
PtK_GFP-tub_mCh-p50_ablate	SD	nan	0	0.273	1.22418	1.1928	1.96248	2.14292	1.82053	1.79161	1.57461	0.890626	1.03301	0.943949	0.723429	1.34274	1.65579	1.65361	1.21332	0.750115	1.1024	0.930039	0.977934	1.10347	1.25609	1.81622	2.24678	1.32348	1.97389	1.54633	1.69392	1.43704	1.197	1.13882	1.27085	1.23892	0.65479	1.12872	1.01621	0.918735	1.01062
PtK_GFP-tub_mCh-p50_ablate	Upper bound	nan	4.935	5.586	7.62218	7.25325	9.27466	9.57492	8.59303	8.5085	7.7998	3.47217	3.37494	3.42589	3.6713	5.19799	5.92098	5.99273	5.32364	5.07743	5.66727	5.35973	5.496	5.86041	6.77078	7.37185	7.80534	6.59011	7.4336	7.15421	7.26913	7.07423	7.227	7.25882	7.70585	6.97892	5.86979	6.34372	6.58121	6.67273	6.51262
PtK_GFP-tub_mCh-p50_ablate	Lower bound	nan	4.935	5.04	5.17382	4.86764	5.3497	5.28908	4.95197	4.92529	4.65058	1.69092	1.30893	1.53799	2.22445	2.51251	2.60939	2.68552	2.89699	3.5772	3.46248	3.49965	3.54013	3.65346	4.2586	3.7394	3.31177	3.94314	3.48582	4.06154	3.88129	4.20015	4.833	4.98118	5.16415	4.50108	4.56021	4.08628	4.54879	4.83527	4.49138
PtK_GFP-tub_mCh-p50_nonablated	Mean length	nan	4.935	5.313	6.398	6.06044	7.31218	7.432	6.7725	6.7169	6.22519	2.58154	2.34194	2.48194	2.94787	3.85525	4.26519	4.33913	4.11031	4.32731	4.56487	4.42969	4.51806	4.75694	5.51469	5.55562	5.55856	5.26662	5.45971	5.60787	5.57521	5.63719	6.03	6.12	6.435	5.74	5.215	5.215	5.565	5.754	5.502
PtK_GFP-tub_mCh-p50_nonablated	SD	nan	0	0.273	1.22418	1.1928	1.96248	2.14292	1.82053	1.79161	1.57461	0.890626	1.03301	0.943949	0.723429	1.34274	1.65579	1.65361	1.21332	0.750115	1.1024	0.930039	0.977934	1.10347	1.25609	1.81622	2.24678	1.32348	1.97389	1.54633	1.69392	1.43704	1.197	1.13882	1.27085	1.23892	0.65479	1.12872	1.01621	0.918735	1.01062
PtK_GFP-tub_mCh-p50_nonablated	Upper bound	nan	4.935	5.586	7.62218	7.25325	9.27466	9.57492	8.59303	8.5085	7.7998	3.47217	3.37494	3.42589	3.6713	5.19799	5.92098	5.99273	5.32364	5.07743	5.66727	5.35973	5.496	5.86041	6.77078	7.37185	7.80534	6.59011	7.4336	7.15421	7.26913	7.07423	7.227	7.25882	7.70585	6.97892	5.86979	6.34372	6.58121	6.67273	6.51262
PtK_GFP-tub_mCh-p50_nonablated	Lower bound	nan	4.935	5.04	5.17382	4.86764	5.3497	5.28908	4.95197	4.92529	4.65058	1.69092	1.30893	1.53799	2.22445	2.51251	2.60939	2.68552	2.89699	3.5772	3.46248	3.49965	3.54013	3.65346	4.2586	3.7394	3.31177	3.94314	3.48582	4.06154	3.88129	4.20015	4.833	4.98118	5.16415	4.50108	4.56021	4.08628	4.54879	4.83527	4.49138

## Sheet: 2E
Condition	Time after ablation	0	1	2	3	4	5
PtK_GFP-tub_ablate	Mean length (µm)	3.06269	4.26108	5.10018	6.00547	6.94329	6.74657
PtK_GFP-tub_ablate	SD	1.03586	1.10915	1.23311	1.35448	1.1809	0.69193
PtK_GFP-tub_ablate	Growth rate	mean slope=0.85 ± 0.092
PtK_GFP-tub_mCh-p50_ablate	Mean length (µm)	2.58154	2.34194	2.48194	2.94787	3.85525	4.26519
PtK_GFP-tub_mCh-p50_ablate	SD	0.890626	1.03301	0.943949	0.723429	1.34274	1.65579
PtK_GFP-tub_mCh-p50_ablate	Growth rate	mean slope=0.38 ± 0.42

## Sheet: 2F
Condition	Time after ablation (min)	-10	-9	-8	-7	-6	-5	-4	-3	-2	-1	0	1	2	3	4	5	6	7	8	9	10	11	12	13	14	15	16	17	18	19	20	21	22	23	24	25	26	27	28	29
PtK_GFP-tub_ablate	Percent recovery after ablation	1.23487	1.1387	1.10023	1.12538	0.944874	1.09431	1.07508	0.976931	1.02023	0.964632	0.431565	0.600431	0.718668	0.846232	0.978381	0.950661	0.896929	0.933777	1.0371	1.06423	1.1387	1.05695	1.18604	1.17421	1.16829	1.13574	1.11206	1.03513	1.08839	1.11798	1.15546	nan	nan	nan	nan	nan	nan	nan	nan	nan
PtK_GFP-tub_ablate	SD	0.152394	0.144997	0.124283	0.113926	0.0754575	0.0710188	0.0744646	0.147941	0.154382	0.15165	0.145963	0.156291	0.173758	0.190861	0.166401	0.0975001	0.0782658	0.095506	0.0803636	0.132569	0.0236729	0.117255	0	0	0	0	0	0	0	0	0	nan	nan	nan	nan	nan	nan	nan	nan	nan
PtK_GFP-tub_mCh-p50_ablate	Percent recovery after ablation	nan	0.899201	0.968076	1.16577	1.10427	1.33235	1.35418	1.23401	1.22388	1.13429	0.47038	0.426722	0.452231	0.537129	0.702461	0.777156	0.790628	0.748936	0.788475	0.831761	0.807129	0.823232	0.866757	1.00483	1.01228	1.01282	0.959627	0.994808	1.02181	1.01585	1.02715	1.09872	1.11512	1.17251	1.04588	0.95022	0.95022	1.01399	1.04843	1.00251
PtK_GFP-tub_mCh-p50_ablate	SD	nan	0	0.0497431	0.223057	0.21734	0.357582	0.390459	0.331717	0.326447	0.286908	0.16228	0.188223	0.171996	0.131815	0.244659	0.301701	0.301302	0.221079	0.136678	0.200867	0.169461	0.178188	0.201063	0.228871	0.330932	0.409384	0.24115	0.35966	0.281756	0.308648	0.261841	0.218104	0.207502	0.23156	0.225743	0.119309	0.205662	0.185162	0.167402	0.184144

## Sheet: 2S1
Condition	# kfiber_ID	raw_length	z_slice1	z_slice_2	z_length	hypot_len	centrosome-adjusted_hypot_length
PtK_GFP-tub_mCh-p50	220401_004_05b_MAX25-29	8.19	25	29	1.2	8.27745	8.27745
PtK_GFP-tub_mCh-p50	220401_004_03a_MAX20-27	9.135	20	27	2.1	9.37327	9.37327
PtK_GFP-tub_mCh-p50	220328_014_04b_MAX11-13	7.35	11	13	0.6	7.37445	7.37445
PtK_GFP-tub_mCh-p50	220328_014_09a_MAX21-24	9.555	21	24	0.9	9.59729	9.59729
PtK_GFP-tub_mCh-p50	220328_014_07b_MAX14-26	7.56	14	26	3.6	8.37339	8.37339
PtK_GFP-tub_mCh-p50	220328_008_07a_MAX26-40	11.13	26	40	4.2	11.8961	11.8961
PtK_GFP-tub_mCh-p50	220331_004_09b_MAX20-24	7.14	20	24	1.2	7.24014	7.24014
PtK_GFP-tub_mCh-p50	220401_004_04a_MAX14-24	6.93	14	24	3	7.55148	7.55148
PtK_GFP-tub_mCh-p50	220331_004_01a_MAX9-11	3.15	9	11	0.6	3.20663	3.20663
PtK_GFP-tub_mCh-p50	220328_014_12b_MAX25-33	9.87	25	33	2.4	10.1576	10.1576
PtK_GFP-tub_mCh-p50	220328_014_10a_MAX29-34	7.98	29	34	1.5	8.11975	8.11975
PtK_GFP-tub_mCh-p50	220328_008_02b_MAX16-21	5.46	16	21	1.5	5.6623	5.6623
PtK_GFP-tub_mCh-p50	220328_014_03a_MAX11-19	9.24	11	19	2.4	9.5466	9.5466
PtK_GFP-tub_mCh-p50	220328_014_03b_MAX20-32	9.135	20	32	3.6	9.81877	9.81877
PtK_GFP-tub_mCh-p50	220328_008_10a_MAX36-41	3.36	36	41	1.5	3.67962	3.67962
PtK_GFP-tub_mCh-p50	220328_008_08a_MAX25-41	10.71	25	41	4.8	11.7364	11.7364
PtK_GFP-tub_mCh-p50	220328_014_06b_MAX25-30	8.505	25	30	1.5	8.63626	8.63626
PtK_GFP-tub_mCh-p50	220328_008_04b_MAX27-35	8.4	27	35	2.4	8.73613	8.73613
PtK_GFP-tub_mCh-p50	220328_014_02b_MAX21-26	5.46	21	26	1.5	5.6623	5.6623
PtK_GFP-tub_mCh-p50	220329_018_03a_MAX25-29	6.3	25	29	1.2	6.41327	6.41327
PtK_GFP-tub_mCh-p50	220328_014_11b_MAX31-37	6.3	31	37	1.8	6.5521	6.5521
PtK_GFP-tub_mCh-p50	220401_004_02a_MAX17-22	3.57	17	22	1.5	3.87232	3.87232
PtK_GFP-tub_mCh-p50	220331_004_10b_MAX22-26	4.62	22	26	1.2	4.7733	4.7733
PtK_GFP-tub_mCh-p50	220401_004_08a_MAX29-37	6.09	29	37	2.4	6.54585	6.54585
PtK_GFP-tub_mCh-p50	220328_014_06a_MAX23-28	7.14	23	28	1.5	7.29586	7.29586
PtK_GFP-tub_mCh-p50	220331_004_04b_MAX6-9	4.095	6	9	0.9	4.19273	4.19273
PtK_GFP-tub_mCh-p50	220328_014_07a_MAX23-26	7.665	23	26	0.9	7.71766	7.71766
PtK_GFP-tub_mCh-p50	220331_004_05a_MAX14-19	7.98	14	19	1.5	8.11975	8.11975
PtK_GFP-tub_mCh-p50	220329_018_02b_MAX16-24	8.925	16	24	2.4	9.24206	9.24206
PtK_GFP-tub_mCh-p50	220329_018_02a_MAX18-29	6.93	18	29	3.3	7.6756	7.6756
PtK_GFP-tub_mCh-p50	220401_004_07a_MAX28-33	5.145	28	33	1.5	5.3592	5.3592
PtK_GFP-tub_mCh-p50	220331_004_01b_MAX5-10	5.46	5	10	1.5	5.6623	5.6623
PtK_GFP-tub_mCh-p50	220401_004_06a_MAX21-24	6.405	21	24	0.9	6.46792	6.46792
PtK_GFP-tub_mCh-p50	220328_008_07b_MAX37-41	7.455	37	41	1.2	7.55096	7.55096
PtK_GFP-tub_mCh-p50	220328_014_10b_MAX24-34	9.765	24	34	3	10.2154	10.2154
PtK_GFP-tub_mCh-p50	220328_008_05a_MAX17-25	6.615	17	25	2.4	7.03692	7.03692
PtK_GFP-tub_mCh-p50	220328_008_02a_MAX15-19	7.77	15	19	1.2	7.86212	7.86212
PtK_GFP-tub_mCh-p50	220401_004_05a_MAX23-27	8.19	23	27	1.2	8.27745	8.27745
PtK_GFP-tub_mCh-p50	220328_008_01a_MAX15-20	6.3	15	20	1.5	6.47611	6.47611
PtK_GFP-tub_mCh-p50	220328_014_09b_MAX20-23	7.56	20	23	0.9	7.61338	7.61338
PtK_GFP-tub_mCh-p50	220328_014_02b_MAX17-23	1.995	17	23	1.8	2.68701	2.68701
PtK_GFP-tub_mCh-p50	220331_004_09a_MAX12-22	10.08	12	22	3	10.517	10.517
PtK_GFP-tub_mCh-p50	220328_008_09a_MAX31-41	7.14	31	41	3	7.74465	7.74465
PtK_GFP-tub_mCh-p50	220331_004_05b_MAX9-17	10.5	9	17	2.4	10.7708	10.7708
PtK_GFP-tub_mCh-p50	220328_014_04a_MAX12-21	7.35	12	21	2.7	7.83023	7.83023
PtK_GFP-tub_mCh-p50	220401_004_01b_MAX15-21	3.99	15	21	1.8	4.37723	4.37723
PtK_GFP-tub_mCh-p50	220331_004_10a_MAX16-23	10.29	16	23	2.1	10.5021	10.5021
PtK_GFP-tub_mCh-p50	220328_014_01b_MAX26-31	6.09	26	31	1.5	6.27201	6.27201
PtK_GFP-tub_mCh-p50	220328_008_04a_MAX15-30	11.445	15	30	4.5	12.2979	12.2979
PtK_GFP-tub_mCh-p50	220331_004_09b_MAX8-24	9.135	8	24	4.8	10.3193	10.3193
PtK_GFP-tub_mCh-p50	220329_018_01b_MAX13-18	8.61	13	18	1.5	8.73969	8.73969
PtK_GFP-tub_mCh-p50	220329_018_03b_MAX22-27	7.56	22	27	1.5	7.70737	7.70737
PtK_GFP-tub_mCh-p50	220328_014_05a_MAX21-24	9.45	21	24	0.9	9.49276	9.49276
PtK_GFP-tub_mCh-p50	220331_004_06a_MAX13-19	9.135	13	19	1.8	9.31065	9.31065
PtK_GFP-tub_mCh-p50	220331_004_02b_MAX5-11	5.25	5	11	1.8	5.55	5.55
PtK_GFP-tub_mCh-p50	220328_008_06a_MAX24-30	6.3	24	30	1.8	6.5521	6.5521
PtK_GFP-tub_mCh-p50	220328_014_08a_MAX27-30	7.35	27	30	0.9	7.4049	7.4049
PtK_GFP-tub_mCh-p50	220328_014_11a_MAX33-37	9.03	33	37	1.2	9.10939	9.10939
PtK_GFP-tub_mCh-p50	220401_004_04b_MAX23-29	6.51	23	29	1.8	6.75427	6.75427
PtK_GFP-tub_mCh-p50	220328_008_03a_MAX15-23	6.3	15	23	2.4	6.74166	6.74166
PtK_GFP-tub_mCh-p50	220328_008_01b_MAX15-20	6.3	15	20	1.5	6.47611	6.47611
PtK_GFP-tub_mCh-p50	220331_004_03b_MAX7-10	10.395	7	10	0.9	10.4339	10.4339
PtK_GFP-tub_mCh-p50	220328_014_02a_MAX11-19	4.305	11	19	2.4	4.9288	4.9288
PtK_GFP-tub_mCh-p50	220328_014_08b_MAX28-32	7.14	28	32	1.2	7.24014	7.24014
PtK_GFP-tub_mCh-p50	220331_004_04a_MAX9-14	8.295	9	14	1.5	8.42953	8.42953
PtK_GFP-tub_mCh-p50	220401_004_03b_MAX20-27	6.825	20	27	2.1	7.14077	7.14077
PtK_GFP-tub_mCh-p50	220401_004_01a_MAX9-24	9.765	9	24	4.5	10.752	10.752
PtK_GFP-tub_mCh-p50	220328_008_03b_MAX16-22	9.45	16	22	1.8	9.6199	9.6199
PtK_GFP-tub_mCh-p50	220328_008_06b_MAX27-31	7.35	27	31	1.2	7.44731	7.44731
PtK_GFP-tub_mCh-p50	220331_004_07a_MAX10-18	7.77	10	18	2.4	8.13221	8.13221
PtK_GFP-tub_mCh-p50	220331_004_02a_MAX7-11	5.355	7	11	1.2	5.48781	5.48781
PtK_GFP-tub_mCh-p50	220331_004_07b_MAX15-20	3.255	15	20	1.5	3.584	3.584
PtK_GFP-tub_mCh-p50	220328_008_05b_MAX22-29	6.195	22	29	2.1	6.54126	6.54126
PtK_GFP-tub_mCh-p50	220328_014_05b_MAX20-25	7.875	20	25	1.5	8.01658	8.01658
PtK_GFP-tub_mCh-p50	220401_004_02b_MAX11-19	9.03	11	19	2.4	9.3435	9.3435
PtK_GFP-tub_mCh-p50	220331_004_08b_MAX9-17	6.405	9	17	2.4	6.83988	6.83988
PtK_GFP-tub_mCh-p50	220328_014_12a_MAX29-34	6.825	29	34	1.5	6.98789	6.98789
PtK_GFP-tub_mCh-p50	220331_004_03a_MAX7-14	7.035	7	14	2.1	7.34175	7.34175
PtK_GFP-tub_mCh-p50	220401_004_07b_MAX32-37	4.83	32	37	1.5	5.05756	5.05756
