# Supplementary material for: Kinetochore-fiber lengths are maintained locally but coordinated globally by poles in the mammalian spindle
Source: eLife. 2023 Jul 3;12:e85208. doi: 10.7554/eLife.85208 (PMC10348741; doi:10.7554/eLife.85208)
Supplement: Figure 2—source data 2. [file elife-85208-fig2-data2.xlsx]

## Sheet: Raw-2H
Condition	Kfiber_ID	[Time after NZ washout (min)] [Length (µm)]
PtK_GFP-tub	220728_001_01a_preNZ	[-14.0	-13	-12	-11	-10	-9.0]	[8.69	8.69	9.11	7.955	2.52	0.21]
PtK_GFP-tub	220728_001_07b_postNZ	[19.0	20	21	22	23	24	25	26	28.0]	[5.75	3.545	5.855	5.33	5.96	2.915	5.015	3.965	5.12]
PtK_GFP-tub	220728_002_02b_preNZ	[-11.0	-10	-9	-8	-7	-6.0]	[4.7	4.62	2.94	1.26	0.735	0.315]
PtK_GFP-tub	220728_002_05a_postNZ	[10.0	11	12	13	14	15	16	17	18	19	20	21	22	23	24	25	26	27	28	29	30	31	32	33	34	35	36.0]	[7.665	6.275	6.905	4.595	5.435	5.33	4.28	4.385	3.965	4.07	2.075	3.86	6.275	4.49	6.59	7.115	5.96	5.015	5.12	5.645	5.435
PtK_GFP-tub	220728_001_03a_preNZ	[-13.0	-12	-11	-10	-9.0]	[9.319999999999999	9.95	8.27	2.1	0.315]
PtK_GFP-tub	220728_002_04a_preNZ	[-11.0	-10	-9	-8	-7	-6.0]	[7.745	8.085	5.04	2.415	0.63	0.21]
PtK_GFP-tub	220728_001_06b_postNZ	[4.0	5	6	7	8	9	10	11	12	19	21	22	23	24	25	26	27	28	29.0]	[3.36	3.885	4.095	4.83	5.46	6.09	4.41	5.855	4.91	6.17	6.38	5.435	4.91	5.015	5.12	5.225	3.65	5.12	5.225]
PtK_GFP-tub	220728_001_01b_preNZ	[-14.0	-13	-12	-11	-10	-9	-8	-7.0]	[8.059999999999999	6.275	5.225	5.435	6.825	4.305	1.47	0.315]
PtK_GFP-tub	220728_002_07a_postNZ	[12.0	13	14	15	16	17	18	19	20	21	22	23	24	25	26	27	28	29	30	31	32	33	34	35.0]	[4.805	4.07	6.695	6.695	6.275	4.595	7.325	8.48	6.485	6.275	5.75	5.54	5.75	6.695	6.485	7.325	5.33	6.8	7.01	6.38	7.01	7.01	6.695	5.12]
PtK_GFP-tub	220728_002_02a_preNZ	[-11.0	-10	-9	-8	-7	-6.0]	[8.479999999999999	7.665	5.04	2.625	1.05	0.21]
PtK_GFP-tub	220728_001_05b_postNZ	[6.0	7	8	9	10	11	12	13	14	15	16	17	18	19	20	21	22	23	24	25	26	27	28	29	30	31.0]	[4.2	4.2	5.04	5.25	6.195	7.325	6.485	6.485	6.8	6.275	5.54	5.855	5.96	4.805	6.38	6.59	6.17	6.275	7.01	6.275	5.75	6.38
PtK_GFP-tub	220728_002_04b_preNZ	[-11.0	-10	-9	-8	-7	-6.0]	[3.545	4.305	2.625	1.26	0.945	0.315]
PtK_GFP-tub	220728_002_06a_postNZ	[13.0	14	15	16	17	18	19	20	21	22	23	24	25	26	27.0]	[4.175	5.645	5.33	4.07	5.435	3.86	4.175	7.535	8.06	8.375	9.635	9.215	9.845	9.005	10.475]
PtK_GFP-tub	220728_001_03b_preNZ	[-13.0	-12	-11	-10	-9	-8	-7	-6.0]	[7.325	5.225	6.695	6.72	4.095	3.045	1.68	0.21]
PtK_GFP-tub	220728_002_05b_postNZ	[10.0	11	12	13	14	15	16	17	18	19	20	21	22	23	24	32	33.0]	[3.78	4.7	3.335	6.275	6.8	5.96	5.75	6.38	6.485	6.065	7.64	6.905	5.645	5.96	5.645	5.12	4.595]
PtK_GFP-tub	220728_002_01b_preNZ	[-11.0	-10	-9	-8	-7.0]	[7.430000000000001	6.195	4.41	3.15	0.315]
PtK_GFP-tub	220523_003_01a_NZ	[-12.0	-11	-10	-9	-8	-7	-6	-5	-4	-3	-2	-1	0	1	2	3	4	5	6	7	8	9	10	11	12	13	14	15	16	17	18	19	20	21	22	23	24	25	26	27	28	29	30	31	32.0]	[6.485	5.75	5.355
PtK_GFP-tub	220728_001_06a_postNZ	[8.0	9	10	11	12	19	20	21	22	23	26.0]	[6.194999999999999	5.775	8.085	5.33	8.69	5.33	5.96	5.33	5.855	4.595	5.435]
PtK_GFP-tub	220728_001_07a_postNZ	[19.0	20	21	22	23	24.0]	[5.015	6.905	4.7	5.015	4.385	6.38]
PtK_GFP-tub	220728_001_02a_preNZ	[-14.0	-13	-12	-11	-10.0]	[8.794999999999998	6.17	6.17	6.8	0.42]
PtK_GFP-tub	220728_002_03b_preNZ	[-11.0	-10	-9	-8	-7	-6.0]	[5.96	5.565	3.255	1.155	0.735	0.21]
PtK_GFP-tub	220728_001_04b_preNZ	[-13.0	-12	-11	-10	-9	-8	-7.0]	[7.22	7.85	7.115	7.035	3.57	1.68	0.315]
PtK_GFP-tub	220728_001_05a_postNZ	[9.0	10	11	12	13	14	15	16	17	18	19	20	21	22	23	24	25	26	27	28	29	30	31	32.0]	[7.9799999999999995	7.665	4.805	4.175	3.86	3.23	2.81	1.97	1.655	2.39	7.115	5.855	5.12	6.065	7.535	5.54	7.115	7.01	5.855	6.17	6.275	5.54	6.59	6.275]
PtK_GFP-tub	220728_002_01a_preNZ	[-11.0	-10	-9	-8	-7	-6.0]	[8.165	8.505	2.52	1.785	0.315	0.21]
PtK_GFP-tub	220728_001_02b_preNZ	[-14.0	-13	-12	-11	-10.0]	[6.275	7.64	8.06	7.955	0.42]
PtK_GFP-tub	220728_002_07b_postNZ	[12.0	13	14	15	16	17	18	19	20	22	23	24	25	26	27	28	29	30	31	32	33	34	35	36.0]	[7.01	7.115	5.435	4.805	5.645	7.43	6.065	4.91	7.955	6.38	6.8	6.275	4.805	6.17	5.54	5.645	5.015	5.96	6.695	7.22	6.17	5.435	7.535	6.59]
PtK_GFP-tub	220728_001_04a_preNZ	[-13.0	-12	-11	-10	-9.0]	[7.64	7.64	7.115	3.78	0.315]
PtK_GFP-tub	220728_002_03a_preNZ	[-11.0	-10	-9	-8	-7	-6.0]	[7.64	6.825	2.1	0.84	0.63	0.315]
PtK_GFP-tub_mCh-p50	220530_003_06a_postNZ	[48.0	49	50	51	52	53	54	55	56	57	58	59	60.0]	[4.095	3.675	3.885	3.57	2.835	5.67	4.515	4.305	4.62	4.62	4.62	6.51	4.62]
PtK_GFP-tub_mCh-p50	220523_013_01b_NZ	[-15.0	-14	-13	-12	-11	-10	-9	-8	-7	-6	-5	-4	-3	-2	-1	0	1	2	3	4	5	6	7	8	9	10	11	12	13	14	15	16	17.0]	[8.084999999999999	7.665	8.085	5.145	2.52	1.575	1.05	0.735	0.945	0.84	1.155	0.84	0.84	0.945	0.735
PtK_GFP-tub_mCh-p50	220530_003_04a_postNZ	[30.0	31	32	33	34	35	36	37	38	39	40	41	42	43	44	45	46	47	48.0]	[1.785	1.785	3.78	5.04	4.515	3.675	4.725	5.145	5.565	4.2	6.3	5.46	4.2	1.68	1.575	1.575	2.205	3.045	2.31]
PtK_GFP-tub_mCh-p50	220523_013_02b_NZ	[-15.0	-14	-13	-12	-11	-10	-9	-8	-7	-6	-5	-4	-3	-2	-1	0	1	2	3	4	5	6	7	8	9	10	11	12	13	14	15	16	17	18	19	20	21.0]	[4.515	6.615	6.51	6.09	2.31	1.26	0.735	0.735	0.735	0.735	0.735
PtK_GFP-tub_mCh-p50	201120_005_02a_NZ	[-14.0	-13	-12	-11	-10	-9	-8	-7	-6	-5	-4	-3	-2	-1	0	1	2	3	4	5	6	7	8	9	10	11	12	13	14	15	16	17	18	19	20	21	22	23.0]	[10.185	10.5	9.975	9.975	9.03	9.03	2.73	0.735	0.315	0.42
PtK_GFP-tub_mCh-p50	201120_005_03a_NZ	[-14.0	-13	-12	-11	-10	-9	-8	-7	-6	-5	-4	-3	-2	-1	0	1	2	3	4	5	6	7	8	9	10	11	12	13	14	15	16	17	18	19	20	21	22	23.0]	[7.455	7.875	7.35	6.195	6.72	7.56	0.63	0.525	0.315	0.42
PtK_GFP-tub_mCh-p50	220804_001_02a_preNZ	[-18.0	-17	-16	-15	-14	-13	-12	-11	-10	-9.0]	[6.93	5.565	6.405	5.565	5.46	6.825	7.56	6.615	5.88	0.21]
PtK_GFP-tub_mCh-p50	220530_003_02a_preNZ	[-13.0	-12	-11	-10	-9.0]	[4.725	4.83	5.04	0.735	0.42]
PtK_GFP-tub_mCh-p50	201120_005_01a_NZ	[-14.0	-13	-12	-11	-10	-9	-8	-7	-6	-5	-4	-3	-2	-1	0	1	2	3	4	5	6	7	8	9	10	11	12	13	14	15	16	17	18	19	20	21	22	23.0]	[7.245	5.04	6.3	6.93	8.295	6.3	3.57	1.26	0.945	0.63
PtK_GFP-tub_mCh-p50	220804_001_03b_postNZ	[-4.0	-3	-2	-1	0	1	2	3.0]	[1.9949999999999999	1.68	1.575	1.785	1.995	2.1	3.885	5.46]
PtK_GFP-tub_mCh-p50	220530_003_05a_postNZ	[34.0	35	36	37	38	39	40	41	42	43.0]	[7.9799999999999995	9.03	9.66	5.565	8.82	9.03	9.24	8.82	9.555	8.19]
PtK_GFP-tub_mCh-p50	201120_005_02b_NZ	[-14.0	-13	-12	-11	-10	-9	-8	-7	-6	-5	-4	-3	-2	-1	0	1	2	3	4	5	6	7	8	9	10	11	12	13	14	15	16	17	18	19	20	21	22	23.0]	[9.24	9.24	9.975	7.77	7.665	5.355	5.985	6.51	5.46	2.94
PtK_GFP-tub_mCh-p50	220804_001_01b_preNZ	[-18.0	-17	-16	-15	-14	-13	-12	-11	-10	-9	-8.0]	[5.7749999999999995	6.195	6.09	3.045	4.935	6.405	6.405	6.825	2.415	2.52	1.155]
PtK_GFP-tub_mCh-p50	220523_013_04a_NZ	[-15.0	-14	-13	-12	-11	-10	-9	-8	-7	-6	-5	-4	-3	-2	-1	0	1	2	3	4	5	6	7	8	9	10	11	12	13	14	15	16	17	18	19	20	21	22	23	24	25	26	27	28	29	30	31	32
PtK_GFP-tub_mCh-p50	220530_003_01b_preNZ	[-16.0	-15	-14	-13	-12	-11	-10	-9	-8.0]	[5.145	4.095	2.835	3.465	3.57	0.945	0.525	0.315	0.21]
PtK_GFP-tub_mCh-p50	220523_013_01a_NZ	[-15.0	-14	-13	-12	-11	-10	-9	-8	-7	-6	-5	-4	-3	-2	-1	0	1	2	3	4	5	6	7	8	9	10	11	12	13	14	15	16	17	18	19	20	21	22	23	24.0]	[5.25	7.455	4.41	4.095	6.195	6.195	7.665	7.245
PtK_GFP-tub_mCh-p50	220523_013_02a_NZ	[-15.0	-14	-13	-12	-11	-10	-9	-8	-7	-6	-5	-4	-3	-2	-1	0	1	2	3	4	5	6	7	8	9	10	11	12	13	14	15	16	17	18	19	20	21.0]	[8.504999999999999	6.09	5.46	7.14	8.085	7.875	4.515	0.525	0.525	0.525	0.525
PtK_GFP-tub_mCh-p50	220523_013_03a_NZ	[-15.0	-14	-13	-12	-11	-10	-9	-8	-7	-6	-5	-4	-3	-2	-1	0	1	2	3	4	5	6	7	8	9	10.0]	[4.41	4.515	5.565	5.145	3.57	3.78	2.94	2.52	2.73	3.99	4.305	4.62	3.78	3.78	0.735	0.945	3.36	0.945	2.205	2.625	3.78	4.2
PtK_GFP-tub_mCh-p50	220804_001_01a_preNZ	[-18.0	-17	-16	-15	-14	-13	-12	-11	-10	-9	-8	-7	-6	-5.0]	[11.235	10.29	9.555	10.29	7.56	4.935	4.935	6.3	4.305	1.785	1.89	1.05	0.63	0.315]
PtK_GFP-tub_mCh-p50	220530_003_05b_postNZ	[39.0	40	41	42	43.0]	[6.72	6.72	5.88	6.825	5.5649999999999995]
PtK_GFP-tub_mCh-p50	220530_003_01a_preNZ	[-16.0	-15	-14	-13	-12	-11	-10	-9	-8	-7	-6.0]	[5.5649999999999995	5.355	7.245	6.93	7.35	7.035	6.09	1.05	0.735	0.525	0.21]
PtK_GFP-tub_mCh-p50	220530_003_04b_postNZ	[35.0	36	37	38	39	40	41	42	43	44	45	46	47	48	49.0]	[1.575	1.785	1.785	3.36	2.415	3.57	3.99	3.15	2.73	2.73	0.84	1.05	0.525	2.31	1.05]
PtK_GFP-tub_mCh-p50	220530_003_03a_preNZ	[-12.0	-10	-9	-8.0]	[6.3	4.2	4.62	0.63]
[truncated: 50 more columns]

## Sheet: 2I
Condition	Before or after NZ washout	K-fiber length averaged over time (µm)
PtK_GFP-tub	Before	7.393	4.66	7.41	7.915	6.364	8.0725	3.925	6.49125	6.8125	5.86333	5.671	5.7625	7.305	8.335	6.07	6.54375	7.2325
PtK_GFP-tub	After	4.82833	5.33481	5.18654	6.275	5.985	6.989	5.70824	5.88348	6.06778	5.4	5.24435	6.19187
PtK_GFP-tub_mCh-p50	Before	5.5125	4.55	9.933	7.119	6.31167	3.8325	6.762	8.778	5.34333	4.725	2.94	5.6	7.1925	4.4975	7.71167	6.51	5.25
PtK_GFP-tub_mCh-p50	After	4.42615	6.93	3.60868	4.655	7.6575	6.2475	3.45	8.589	7.8	6.72	5.446	4.795	6.342	2.191
