# Supplementary material for: Kinetochore-fiber lengths are maintained locally but coordinated globally by poles in the mammalian spindle
Source: eLife. 2023 Jul 3;12:e85208. doi: 10.7554/eLife.85208 (PMC10348741; doi:10.7554/eLife.85208)
Supplement: Figure 3—source data 1. [file elife-85208-fig3-data1.xlsx]

## Sheet: 3D
Condition	[Photomark position relative to minus-end (µm)] [Time after ablation or bleaching (min)] Slope
PtK_GFP-tub_flux	[8.23878009574468	8.17322	8.10767	8.04211	7.97655	7.91099	7.84544	7.77988	7.71432	7.64877	7.58321	7.51765	7.45209	7.38654	7.320979236170212]	[0.0	0.2	0.4	0.6	0.8	1	1.2	1.4	1.6	1.8	2	2.2	2.4	2.6	2.8]	-0.327786
PtK_GFP-tub_flux	[5.934021586956522	5.87191	5.80979	5.74768	5.68556	5.62345	5.56133	5.49922	5.4371	5.37499	5.312870638339919]	[0.0	0.2	0.4	0.6	0.8	1	1.2	1.4	1.6	1.8	2.0]	-0.310575
PtK_GFP-tub_flux	[8.538753374999999	8.38438	8.23	8.07563	7.92125	7.76688	7.6125	7.45813	7.30375	7.14938	6.995	6.840627]	[0.0	0.2	0.4	0.6	0.8	1	1.2	1.4	1.6	1.8	2	2.2]	-0.771876
PtK_GFP-tub_flux	[4.13210616	4.06906	4.00601	3.94296	3.87991	3.81685	3.7538	3.69075	3.6277	3.56465	3.5016	3.43855	3.3755	3.3124525199999995]	[0.0	0.05	0.1	0.15	0.2	0.25	0.3	0.35	0.4	0.45	0.5	0.55	0.6	0.65]	-1.26101
PtK_GFP-tub_flux	[5.934021586956523	5.87032	5.80661	5.74291	5.6792	5.61549	5.55179	5.48808	5.42438	5.36067	5.296967911067194]	[0.0	0.2	0.4	0.6	0.8	1	1.2	1.4	1.6	1.8	2.0]	-0.318527
PtK_GFP-tub_flux	[6.957549765957446	6.83164	6.70573	6.57982	6.45392	6.32801	6.2021	6.07619	5.95028	5.82437	5.69846	5.57256	5.446647265139116]	[0.0	0.2	0.4	0.6	0.8	1	1.2	1.4	1.6	1.8	2	2.2	2.4]	-0.629543
PtK_GFP-tub_flux	[6.430577192307692	6.30011	6.16965	6.03918	5.90872	5.77825	5.64779	5.51732	5.38686	5.25639	5.12593	4.995461557692307]	[0.0	0.2	0.4	0.6	0.8	1	1.2	1.4	1.6	1.8	2	2.2]	-0.652325
PtK_GFP-tub_flux	[8.10999975	7.93846	7.76692	7.59538	7.42385	7.25231	7.08077	6.90923	6.73769	6.56615	6.39462	6.22308	6.051538442307692]	[0.0	0.2	0.4	0.6	0.8	1	1.2	1.4	1.6	1.8	2	2.2	2.4]	-0.857692
PtK_GFP-tub_flux	[6.8381215	6.71416	6.5902	6.46625	6.34229	6.21833	6.09437	5.97041	5.84645	5.7225	5.59854	5.47458	5.41625	5.35791	5.29958	5.24124	5.18291	5.124577208333332]	[0.0	0.2	0.4	0.6	0.8	1	1.2	1.4	1.6	1.8	2	2.2	2.4	2.6	2.8	3	3.2	3.4]	-0.522608
PtK_GFP-tub_flux	[6.237000000000001	6.1665	6.096	6.0255	5.955	5.8845	5.813999999999999]	[0.0	0.2	0.4	0.6	0.8	1	1.2]	-0.3525
PtK_GFP-tub_flux	[6.880591941176471	6.85027	6.81995	6.78963	6.75931	6.72899	6.69867	6.66835	6.63802	6.6077	6.577382262032083]	[0.0	0.2	0.4	0.6	0.8	1	1.2	1.4	1.6	1.8	2.0]	-0.151605
PtK_GFP-tub_flux	[4.708842923076923	4.61394	4.51904	4.42413	4.32923	4.23433	4.13942	4.04452	3.94961	3.85471	3.75981	3.6649035769230767]	[0.0	0.2	0.4	0.6	0.8	1	1.2	1.4	1.6	1.8	2	2.2]	-0.474518
PtK_GFP-tub_mCh-p50_flux	[3.114997499999999	3.05375	2.9925	2.93125	2.87	2.66875	2.4675	2.51125	2.555	2.59875	2.6425	2.88	3.1175	3.02	2.9225	2.825	2.7275009999999997]	[0.0	0.2	0.4	0.6	0.8	1	1.2	1.4	1.6	1.8	2	2.2	2.4	2.6	2.8	3	3.2]	-0.0320606
PtK_GFP-tub_mCh-p50_flux	[6.115848852272728	6.09698	6.07811	6.05924	6.04037	6.0215	6.00263	5.98376	5.96489	5.94602	5.96188	5.97773	5.99358	6.00943	6.02529	6.04114	6.05699	6.07284	6.08869	6.10455	6.1204	6.13625	6.1521	6.16796	6.18381	6.19966	6.21551	6.23137	6.24722	6.26307	6.27892	6.24016	6.2014	6.16263	6.12387
PtK_GFP-tub_mCh-p50_flux	[5.554400727272728	5.48053	5.40665	5.33277	5.2589	5.18502	5.11115	5.03727	4.9634	4.88952	4.81565	4.74177	4.66789	4.59402	4.57685	4.55968	4.54251	4.52534	4.50817	4.49101	4.47384	4.45667	4.4395	4.42233	4.40516	4.38799	4.37082	4.35365	4.33648430965909]	[0.0	0.2	0.4	0.6	0.8	1	6.08511	6.04634	6.00758	5.96882	5.93005	5.89129	5.85253	5.8137633015734265]	[0.0	0.2	0.4	0.6	0.8	1
PtK_GFP-tub_mCh-p50_flux	[4.014791375	3.92663	3.83847	3.7503	3.66214	3.57398	3.48581	3.39765	3.30949	3.22133	3.133162852272726]	[0.0	0.2	0.4	0.6	0.8	1	1.2	1.4	1.6	1.8	2.0]	-0.440814													1.2	1.4	1.6	1.8	2	2.2	2.4	2.6	2.8	3	3.2	3.4	3.6	3.8
PtK_GFP-tub_mCh-p50_flux	[4.291753256756757	4.27988	4.26801	4.25614	4.24427	4.2324	4.22053	4.20865	4.19678	4.18491	4.17304	4.16117	4.1493	4.13743	4.12556	4.11368	4.10181	4.08994	4.07807	4.0662	4.05433	4.03677	4.01921	4.00165	3.98409	3.96653	3.94897	3.931413972972973]	[0.0	0.2	0.4	0.6	0.8	1	1.2
PtK_GFP-tub_mCh-p50_flux	[3.234317863636364	3.18614	3.13795	3.08977	3.04159	2.99341	2.94523	2.89705	2.77136	2.64568	2.52	2.46575	2.4115	2.35725	2.42113	2.485	2.54888	2.61275	2.67663	2.74051	2.80438	2.75042	2.52146	2.2925	2.063541375]	[0.0	0.2	0.4	0.6	0.8	1	1.2	1.4	1.6	1.8	1.4	1.6	1.8	2	2.2	2.4	2.6	2.8	3	3.2	3.4	3.6	3.8	4
PtK_GFP-tub_mCh-p50_flux	[3.8772195	3.86194	3.84666	3.83139	3.81611	3.80083	3.7855545]	[0.0	0.2	0.4	0.6	0.8	1	1.2]	-0.0763875																					2	2.2	2.4	2.6	2.8	3	3.2	3.4	3.6	3.8	4	4.2	4.4	4.6
PtK_GFP-tub_mCh-p50_flux	[7.823846153846157	7.76955	7.71526	7.66096	7.60667	7.55237	7.49808	7.44378	7.38949	7.33519	7.2809	7.2266	7.17231	7.11801	7.06372	7.00942	6.95513	6.90083	6.84654	6.79224	6.73795	6.68365	6.62936	6.57506	6.52077	6.46647	6.41218	6.35788	6.30359	6.24929	6.195	6.1407	6.08641	6.03211	5.97782
PtK_GFP-tub_mCh-p50_flux	[3.8903913461538466	3.87633	3.86227	3.84821	3.83415	3.82009	3.80603	3.79197	3.77791	3.76385	3.83923	3.91462	3.99	3.926363318181817]	[0.0	0.2	0.4	0.6	0.8	1	1.2	1.4	1.6	1.8	2	2.2	2.4	2.6]	0.0179575							5.92352	5.86923	5.81493	5.760637615384615]	[0.0	0.2	0.4	0.6	0.8	1	1.2	1.4	1.6	1.8
PtK_GFP-tub_mCh-p50_flux	[4.700931374999999	4.80287	4.90481	5.00675	5.10869	5.21062	5.31256	5.4145	5.27411	5.13372	4.99333	4.93444	4.87556	4.81667	4.75778	4.69889	4.64	4.82125	4.72062	4.62	4.51938	4.41875	4.31813	4.2175	4.11688	4.01626	4.23719	4.18688	4.13657	4.08625	4.03594	3.98563	3.93531	3.885	3.53208
PtK_GFP-tub_mCh-p50_flux	[3.7537535	3.68667	3.61959	3.5525	3.48542	3.41834	3.35125	3.28417	3.21709	3.15001	3.08292	3.01584	3.09843	3.18101	3.2636	3.34619	3.32961	3.31303	3.29645	3.27987	3.26329	3.24671	3.23013	3.21355	3.19697	3.18039	3.16381	3.4319	3.69999	3.96807	4.23616	4.19611	4.15605	4.116	4.07594	3.50417	3.47625	3.44833	3.4204185000000003]	[0.0	0.2	0.4	0.6	0.8	1	1.2	1.4	1.6	1.8
[truncated: 38 more columns]
