# Supplementary material for: Kinetochore-fiber lengths are maintained locally but coordinated globally by poles in the mammalian spindle
Source: eLife. 2023 Jul 3;12:e85208. doi: 10.7554/eLife.85208 (PMC10348741; doi:10.7554/eLife.85208)
Supplement: Figure 4—source data 1. [file elife-85208-fig4-data1.xlsx]

## Sheet: 4C
Figure	Condition	[Photomark position relative to minus-end (µm)] [Time after ablation or bleaching (min)] Slope
4C	PtK_GFP-tub_flux_ablate	[3.363888499999999	3.31819	3.2725	3.22681	3.18111	3.1354172500000006]	[0.0	0.2	0.4	0.6	0.8	1.0]	-0.228471
4C	PtK_GFP-tub_flux_ablate	[3.179173375	3.14334	3.10751	3.07167	3.03584	3.00001	2.96417	2.92834	2.8925	2.85667	2.82084	2.785	2.89695	3.00889	3.12084	3.12951	3.13819	3.14686	3.15554	3.16422	3.17289	3.06529	2.95769	2.85008	2.74248	2.63488	2.52727	2.41967	2.46065	2.50163	2.5426	2.58358	2.62456	2.66554	2.706515174999999]	[0.0	0.2	0.4	0.6	0.8	1	1.2	1.4	1.6	1.8	2	2.2	2.4
4C	PtK_GFP-tub_flux_ablate	[2.01140625	2.05538	2.09934	2.14331	2.18728	2.23125	2.27522	2.31919	2.28375	2.2483124999999995]	[0.0	0.2	0.4	0.6	0.8	1	1.2	1.4	1.6	1.8]	0.159688
4C	PtK_GFP-tub_flux_ablate	[2.129166666666665	2.21521	2.30125	2.38729	2.47333	2.55937	2.64541	2.7314552708333317]	[0.0	0.2	0.4	0.6	0.8	1	1.2	1.4]	0.430206
4C	PtK_GFP-tub_flux_ablate	[1.1946735500000005	1.21101	1.22734	1.24367	1.26	1.2763338000000009]	[0.0	0.2	0.4	0.6	0.8	1.0]	0.0816603
4C	PtK_GFP-tub_flux_ablate	[2.1145774999999998	2.12479	2.135	2.1452060000000004]	[0.0	0.2	0.4	0.6]	0.0510475
4C	PtK_GFP-tub_mCh-p50_flux_ablate	[2.974996499999999	3.09346	3.21192	3.33038	3.25365	3.17692	3.10019	3.02346	2.94673	2.87	2.79327	2.71653	2.6398041923076914]	[0.0	0.2	0.4	0.6	0.8	1	1.2	1.4	1.6	1.8	2	2.2	2.4]	-0.212056
4C	PtK_GFP-tub_mCh-p50_flux_ablate	[2.2067466749999993	2.12975	2.05275	1.9757445749999982]	[0.0	0.2	0.4	0.6]	-0.385004
4C	PtK_GFP-tub_mCh-p50_flux_ablate	[2.6337507954545454	2.645	2.65625	2.6675	2.67875	2.69	2.7012487500000004]	[0.0	0.2	0.4	0.6	0.8	1	1.2]	0.0562483
4C	PtK_GFP-tub_mCh-p50_flux_ablate	[2.257499999999999	2.268	2.2785	2.289	2.299499999999999]	[0.0	0.2	0.4	0.6	0.8]	0.0525
4C	PtK_GFP-tub_mCh-p50_flux_ablate	[1.1899964999999992	1.37875	1.5675	1.75625	1.65187	1.5475	1.4431199999999984]	[0.0	0.2	0.4	0.6	0.8	1	1.2]	0.210936
4C	PtK_GFP-tub_mCh-p50_flux_ablate	[1.834807153846154	1.85315	1.87149	1.88983	1.90817	1.92651	1.94485	1.9631946923076924]	[0.0	0.2	0.4	0.6	0.8	1	1.2	1.4]	0.0917054
4C	PtK_GFP-tub_mCh-p50_flux_ablate	[1.6065042000000003	1.40467	1.20284	1.001	0.799169	1.24333	1.6875	1.74667	1.80583	1.865	1.92417	1.9833362500000007]	[0.0	0.2	0.4	0.6	0.8	1	1.2	1.4	1.6	1.8	2	2.2]	0.363053
[truncated: 23 more columns]

## Sheet: 4D
	Minus-end Depolymerization Rates (µm/min)
PtK_GFP-tub_flux	0.327786	0.310575	0.771876	1.26101	0.318527	0.629543	0.652325	0.857692	0.522608	0.3525	0.151605	0.474518
PtK_GFP-tub_flux_ablate	0.228471	0.080144	-0.159688	-0.430206	-0.0816603	-0.0510475
PtK_GFP-tub_mCh-p50_flux	0.0320606	-0.00187889	0.212946	0.440814	0.0643686	0.159529	0.0763875	0.271475	-0.0179575	0.23123	-0.093292
PtK_GFP-tub_mCh-p50_flux_ablate	0.212056	0.385004	-0.0562483	-0.0525	-0.210936	-0.0917054	-0.363053
