# Supplementary material for: Kinetochore-fiber lengths are maintained locally but coordinated globally by poles in the mammalian spindle
Source: eLife. 2023 Jul 3;12:e85208. doi: 10.7554/eLife.85208 (PMC10348741; doi:10.7554/eLife.85208)
Supplement: Figure 5—source data 1. [file elife-85208-fig5-data1.xlsx]

## Sheet: 5C
Condition	# Chromatid Separation Distance (µm)
PtK_GFP-tub	0.315	0.525	0.735	2.205	4.2	6.3	7.245	8.19	8.4	9.87	11.13	12.18	12.6
PtK_GFP-tub	0.105	0.21	0.735	1.155	0.84	2.625	7.14	8.505	8.925	8.925	12.495	13.86	15.75	16.8	16.275	16.275	16.17
PtK_GFP-tub	0.525	1.68	1.575	2.73	6.615	8.085	8.715	9.66	10.08	11.55
PtK_GFP-tub	0.525	0.735	1.365	1.575	1.05	2.625	2.625	4.095	5.355	6.615	9.555	12.075	13.125
PtK_GFP-tub	0.315	1.05	3.885	3.36	7.77	9.975	10.29	11.655	12.075	12.915	13.44	14.49	14.49
PtK_GFP-tub_mCh-p50	0.21	0.735	0.945	1.05	2.31	1.89	2.52	2.415	2.415	3.045	2.94	3.675	4.095	3.57	3.36	3.885	4.095	3.675	3.99	4.2	4.2	4.2
PtK_GFP-tub_mCh-p50	0.21	0.84	0.945	1.365	1.26	1.89	2.625	2.1	3.255	3.15	2.94	2.625	3.465	3.99	3.78	3.78	3.36	3.255	2.835	2.835	3.465	3.255	3.36
PtK_GFP-tub_mCh-p50	0.105	0.42	0.84	1.26	1.785	1.995	4.2	3.885	5.46	5.46	5.985	7.14	9.03	11.76	13.65	15.225	16.59	18.69
PtK_GFP-tub_mCh-p50	0.735	1.05	1.155	1.05	1.47	1.89	2.835	4.305	5.565	7.14	9.135	10.29	12.075	13.65	15.645	17.22	18.69	20.79
PtK_GFP-tub_mCh-p50	0.21	0.315	0.945	1.05	1.47	2.94	3.255	4.41	5.04	5.355	5.775	5.985	5.88	6.51	6.51	5.88	6.3	6.825	7.035	6.93	6.09	6.615	6.615	6.825
PtK_GFP-tub_mCh-p50	0.315	0.945	0.945	1.26	2.1	2.1	2.31	3.15	2.835	3.36	4.515	5.25	5.88	6.405	6.195	6.3	7.035	7.14	7.245	7.56	7.875	7.98	8.4	8.4
PtK_GFP-tub_mCh-p50	1.26	1.68	1.89	2.415	3.045	2.835	3.15	3.36	3.78	4.62	5.985	7.14	8.085	10.395	11.76	12.915
PtK_GFP-tub_mCh-p50	0.21	0.21	0.315	0.735	1.155	2.205	1.68	2.31	3.465	4.935	5.04	5.46	5.67	5.775	6.09	6.615
PtK_GFP-tub_mCh-p50	0.945	0.525	0.525	1.365	2.52	1.05	0.735	0.84	1.47	2.31	1.995	1.785	4.095	3.675	3.99	4.515	5.04	5.25	5.565	5.88	5.775	5.565	5.565	5.145	5.355	5.46	5.145	4.935

## Sheet: 5D
Condition	Cell segments formed
PtK_GFP-tub	0.536682	0.463318	0.387186	0.612814	0.341094	0.658906	0.477649	0.522351	0.500784	0.499216	0.4987	0.5013	0.492571	0.507429	0.594854	0.405146
PtK_GFP-tub_mCh-p50	1	0.84068	0.15932	1	0.318615	0.210633	0.235912	0.23484	0.48951	0.51049	0.450282	0.0954396	0.454278	0.801018	0.198982	0.387397	0.612603	0.3718	0.440821	0.187379	0.537025	0.462975

## Sheet: 5E
Condition	Fraction DNA per cell
PtK_GFP-tub	0.536682	0.463318	0.387186	0.612814	0.341094	0.658906	0.477649	0.522351	0.500784	0.499216	0.4987	0.5013	0.492571	0.507429	0.594854	0.405146
PtK_GFP-tub_mCh-p50	1	0.84068	0.15932	1	0.318615	0.210633	0.235912	0.23484	0.48951	0.51049	0.450282	0.0954396	0.454278	0.801018	0.198982	0.387397	0.612603	0.3718	0.440821	0.187379	0.537025	0.462975
