# Supplementary material for: Kinetochore-fiber lengths are maintained locally but coordinated globally by poles in the mammalian spindle
Source: eLife journal article supplement (doi:10.7554/elife.85208), 2023-07-03
Supplement: supp [file elife_poa_e85208_Source_data_1.xlsx]

## Sheet: Raw-3D,4C
Figure	Condition	[Photomark position relative to minus-end (µm)] [Time after ablation or bleaching (min)] Slope
3D	PtK_GFP-tub_flux	[8.23878009574468	8.17322	8.10767	8.04211	7.97655	7.91099	7.84544	7.77988	7.71432	7.64877	7.58321	7.51765	7.45209	7.38654	7.320979236170212]	[0.0	0.2	0.4	0.6	0.8	1	1.2	1.4	1.6	1.8	2	2.2	2.4	2.6	2.8]	-0.327786
3D	PtK_GFP-tub_flux	[5.934021586956522	5.87191	5.80979	5.74768	5.68556	5.62345	5.56133	5.49922	5.4371	5.37499	5.312870638339919]	[0.0	0.2	0.4	0.6	0.8	1	1.2	1.4	1.6	1.8	2.0]	-0.310575
3D	PtK_GFP-tub_flux	[8.538753374999999	8.38438	8.23	8.07563	7.92125	7.76688	7.6125	7.45813	7.30375	7.14938	6.995	6.840627]	[0.0	0.2	0.4	0.6	0.8	1	1.2	1.4	1.6	1.8	2	2.2]	-0.771876
3D	PtK_GFP-tub_flux	[4.13210616	4.06906	4.00601	3.94296	3.87991	3.81685	3.7538	3.69075	3.6277	3.56465	3.5016	3.43855	3.3755	3.3124525199999995]	[0.0	0.05	0.1	0.15	0.2	0.25	0.3	0.35	0.4	0.45	0.5	0.55	0.6	0.65]	-1.26101
3D	PtK_GFP-tub_flux	[5.934021586956523	5.87032	5.80661	5.74291	5.6792	5.61549	5.55179	5.48808	5.42438	5.36067	5.296967911067194]	[0.0	0.2	0.4	0.6	0.8	1	1.2	1.4	1.6	1.8	2.0]	-0.318527
3D	PtK_GFP-tub_flux	[6.957549765957446	6.83164	6.70573	6.57982	6.45392	6.32801	6.2021	6.07619	5.95028	5.82437	5.69846	5.57256	5.446647265139116]	[0.0	0.2	0.4	0.6	0.8	1	1.2	1.4	1.6	1.8	2	2.2	2.4]	-0.629543
3D	PtK_GFP-tub_flux	[6.430577192307692	6.30011	6.16965	6.03918	5.90872	5.77825	5.64779	5.51732	5.38686	5.25639	5.12593	4.995461557692307]	[0.0	0.2	0.4	0.6	0.8	1	1.2	1.4	1.6	1.8	2	2.2]	-0.652325
3D	PtK_GFP-tub_flux	[8.10999975	7.93846	7.76692	7.59538	7.42385	7.25231	7.08077	6.90923	6.73769	6.56615	6.39462	6.22308	6.051538442307692]	[0.0	0.2	0.4	0.6	0.8	1	1.2	1.4	1.6	1.8	2	2.2	2.4]	-0.857692
3D	PtK_GFP-tub_flux	[6.8381215	6.71416	6.5902	6.46625	6.34229	6.21833	6.09437	5.97041	5.84645	5.7225	5.59854	5.47458	5.41625	5.35791	5.29958	5.24124	5.18291	5.124577208333332]	[0.0	0.2	0.4	0.6	0.8	1	1.2	1.4	1.6	1.8	2	2.2	2.4	2.6	2.8	3	3.2	3.4]	-0.522608
3D	PtK_GFP-tub_flux	[6.237000000000001	6.1665	6.096	6.0255	5.955	5.8845	5.813999999999999]	[0.0	0.2	0.4	0.6	0.8	1	1.2]	-0.3525
3D	PtK_GFP-tub_flux	[6.880591941176471	6.85027	6.81995	6.78963	6.75931	6.72899	6.69867	6.66835	6.63802	6.6077	6.577382262032083]	[0.0	0.2	0.4	0.6	0.8	1	1.2	1.4	1.6	1.8	2.0]	-0.151605
3D	PtK_GFP-tub_flux	[4.708842923076923	4.61394	4.51904	4.42413	4.32923	4.23433	4.13942	4.04452	3.94961	3.85471	3.75981	3.6649035769230767]	[0.0	0.2	0.4	0.6	0.8	1	1.2	1.4	1.6	1.8	2	2.2]	-0.474518
4C	PtK_GFP-tub_flux_ablate	[3.363888499999999	3.31819	3.2725	3.22681	3.18111	3.1354172500000006]	[0.0	0.2	0.4	0.6	0.8	1.0]	-0.228471
4C	PtK_GFP-tub_flux_ablate	[3.179173375	3.14334	3.10751	3.07167	3.03584	3.00001	2.96417	2.92834	2.8925	2.85667	2.82084	2.785	2.89695	3.00889	3.12084	3.12951	3.13819	3.14686	3.15554	3.16422	3.17289	3.06529	2.95769	2.85008	2.74248	2.63488	2.52727	2.41967	2.46065	2.50163	2.5426	2.58358	2.62456	2.66554	2.706515174999999]	[0.0	0.2	0.4	0.6	0.8	1	1.2	1.4	1.6	1.8	2	2.2	2.4
4C	PtK_GFP-tub_flux_ablate	[2.01140625	2.05538	2.09934	2.14331	2.18728	2.23125	2.27522	2.31919	2.28375	2.2483124999999995]	[0.0	0.2	0.4	0.6	0.8	1	1.2	1.4	1.6	1.8]	0.159688
4C	PtK_GFP-tub_flux_ablate	[2.129166666666665	2.21521	2.30125	2.38729	2.47333	2.55937	2.64541	2.7314552708333317]	[0.0	0.2	0.4	0.6	0.8	1	1.2	1.4]	0.430206
4C	PtK_GFP-tub_flux_ablate	[1.1946735500000005	1.21101	1.22734	1.24367	1.26	1.2763338000000009]	[0.0	0.2	0.4	0.6	0.8	1.0]	0.0816603
4C	PtK_GFP-tub_flux_ablate	[2.1145774999999998	2.12479	2.135	2.1452060000000004]	[0.0	0.2	0.4	0.6]	0.0510475
3D	PtK_GFP-tub_mCh-p50_flux	[3.114997499999999	3.05375	2.9925	2.93125	2.87	2.66875	2.4675	2.51125	2.555	2.59875	2.6425	2.88	3.1175	3.02	2.9225	2.825	2.7275009999999997]	[0.0	0.2	0.4	0.6	0.8	1	1.2	1.4	1.6	1.8	2	2.2	2.4	2.6	2.8	3	3.2]	-0.0320606
3D	PtK_GFP-tub_mCh-p50_flux	[6.115848852272728	6.09698	6.07811	6.05924	6.04037	6.0215	6.00263	5.98376	5.96489	5.94602	5.96188	5.97773	5.99358	6.00943	6.02529	6.04114	6.05699	6.07284	6.08869	6.10455	6.1204	6.13625	6.1521	6.16796	6.18381	6.19966	6.21551	6.23137	6.24722	6.26307	6.27892	6.24016	6.2014	6.16263	6.12387
3D	PtK_GFP-tub_mCh-p50_flux	[5.554400727272728	5.48053	5.40665	5.33277	5.2589	5.18502	5.11115	5.03727	4.9634	4.88952	4.81565	4.74177	4.66789	4.59402	4.57685	4.55968	4.54251	4.52534	4.50817	4.49101	4.47384	4.45667	4.4395	4.42233	4.40516	4.38799	4.37082	4.35365	4.33648430965909]	[0.0	0.2	0.4	0.6	0.8	1	6.08511	6.04634	6.00758	5.96882	5.93005	5.89129	5.85253	5.8137633015734265]	[0.0	0.2	0.4	0.6	0.8
3D	PtK_GFP-tub_mCh-p50_flux	[4.014791375	3.92663	3.83847	3.7503	3.66214	3.57398	3.48581	3.39765	3.30949	3.22133	3.133162852272726]	[0.0	0.2	0.4	0.6	0.8	1	1.2	1.4	1.6	1.8	2.0]	-0.440814													1.2	1.4	1.6	1.8	2	2.2	2.4	2.6	2.8	3	3.2	3.4	3.6
3D	PtK_GFP-tub_mCh-p50_flux	[4.291753256756757	4.27988	4.26801	4.25614	4.24427	4.2324	4.22053	4.20865	4.19678	4.18491	4.17304	4.16117	4.1493	4.13743	4.12556	4.11368	4.10181	4.08994	4.07807	4.0662	4.05433	4.03677	4.01921	4.00165	3.98409	3.96653	3.94897	3.931413972972973]	[0.0	0.2	0.4	0.6	0.8	1	1.2
3D	PtK_GFP-tub_mCh-p50_flux	[3.234317863636364	3.18614	3.13795	3.08977	3.04159	2.99341	2.94523	2.89705	2.77136	2.64568	2.52	2.46575	2.4115	2.35725	2.42113	2.485	2.54888	2.61275	2.67663	2.74051	2.80438	2.75042	2.52146	2.2925	2.063541375]	[0.0	0.2	0.4	0.6	0.8	1	1.2	1.4	1.6	1.8	1.4	1.6	1.8	2	2.2	2.4	2.6	2.8	3	3.2	3.4	3.6	3.8
3D	PtK_GFP-tub_mCh-p50_flux	[3.8772195	3.86194	3.84666	3.83139	3.81611	3.80083	3.7855545]	[0.0	0.2	0.4	0.6	0.8	1	1.2]	-0.0763875																					2	2.2	2.4	2.6	2.8	3	3.2	3.4	3.6	3.8	4	4.2	4.4
3D	PtK_GFP-tub_mCh-p50_flux	[7.823846153846157	7.76955	7.71526	7.66096	7.60667	7.55237	7.49808	7.44378	7.38949	7.33519	7.2809	7.2266	7.17231	7.11801	7.06372	7.00942	6.95513	6.90083	6.84654	6.79224	6.73795	6.68365	6.62936	6.57506	6.52077	6.46647	6.41218	6.35788	6.30359	6.24929	6.195	6.1407	6.08641	6.03211	5.97782
3D	PtK_GFP-tub_mCh-p50_flux	[3.8903913461538466	3.87633	3.86227	3.84821	3.83415	3.82009	3.80603	3.79197	3.77791	3.76385	3.83923	3.91462	3.99	3.926363318181817]	[0.0	0.2	0.4	0.6	0.8	1	1.2	1.4	1.6	1.8	2	2.2	2.4	2.6]	0.0179575							5.92352	5.86923	5.81493	5.760637615384615]	[0.0	0.2	0.4	0.6	0.8	1	1.2	1.4	1.6
3D	PtK_GFP-tub_mCh-p50_flux	[4.700931374999999	4.80287	4.90481	5.00675	5.10869	5.21062	5.31256	5.4145	5.27411	5.13372	4.99333	4.93444	4.87556	4.81667	4.75778	4.69889	4.64	4.82125	4.72062	4.62	4.51938	4.41875	4.31813	4.2175	4.11688	4.01626	4.23719	4.18688	4.13657	4.08625	4.03594	3.98563	3.93531	3.885	3.53208
3D	PtK_GFP-tub_mCh-p50_flux	[3.7537535	3.68667	3.61959	3.5525	3.48542	3.41834	3.35125	3.28417	3.21709	3.15001	3.08292	3.01584	3.09843	3.18101	3.2636	3.34619	3.32961	3.31303	3.29645	3.27987	3.26329	3.24671	3.23013	3.21355	3.19697	3.18039	3.16381	3.4319	3.69999	3.96807	4.23616	4.19611	4.15605	4.116	4.07594	3.50417	3.47625	3.44833	3.4204185000000003]	[0.0	0.2	0.4	0.6	0.8	1	1.2	1.4	1.6
4C	PtK_GFP-tub_mCh-p50_flux_ablate	[2.974996499999999	3.09346	3.21192	3.33038	3.25365	3.17692	3.10019	3.02346	2.94673	2.87	2.79327	2.71653	2.6398041923076914]	[0.0	0.2	0.4	0.6	0.8	1	1.2	1.4	1.6	1.8	2	2.2	2.4]	-0.212056
4C	PtK_GFP-tub_mCh-p50_flux_ablate	[2.2067466749999993	2.12975	2.05275	1.9757445749999982]	[0.0	0.2	0.4	0.6]	-0.385004
4C	PtK_GFP-tub_mCh-p50_flux_ablate	[2.6337507954545454	2.645	2.65625	2.6675	2.67875	2.69	2.7012487500000004]	[0.0	0.2	0.4	0.6	0.8	1	1.2]	0.0562483
4C	PtK_GFP-tub_mCh-p50_flux_ablate	[2.257499999999999	2.268	2.2785	2.289	2.299499999999999]	[0.0	0.2	0.4	0.6	0.8]	0.0525
4C	PtK_GFP-tub_mCh-p50_flux_ablate	[1.1899964999999992	1.37875	1.5675	1.75625	1.65187	1.5475	1.4431199999999984]	[0.0	0.2	0.4	0.6	0.8	1	1.2]	0.210936
4C	PtK_GFP-tub_mCh-p50_flux_ablate	[1.834807153846154	1.85315	1.87149	1.88983	1.90817	1.92651	1.94485	1.9631946923076924]	[0.0	0.2	0.4	0.6	0.8	1	1.2	1.4]	0.0917054
4C	PtK_GFP-tub_mCh-p50_flux_ablate	[1.6065042000000003	1.40467	1.20284	1.001	0.799169	1.24333	1.6875	1.74667	1.80583	1.865	1.92417	1.9833362500000007]	[0.0	0.2	0.4	0.6	0.8	1	1.2	1.4	1.6	1.8	2	2.2]	0.363053
[truncated: 39 more columns]

## Sheet: 4D
	Minus-end Depolymerization Rates (µm/min)
PtK_GFP-tub_flux	0.327786	0.310575	0.771876	1.26101	0.318527	0.629543	0.652325	0.857692	0.522608	0.3525	0.151605	0.474518
PtK_GFP-tub_flux_ablate	0.228471	0.080144	-0.159688	-0.430206	-0.0816603	-0.0510475
PtK_GFP-tub_mCh-p50_flux	0.0320606	-0.00187889	0.212946	0.440814	0.0643686	0.159529	0.0763875	0.271475	-0.0179575	0.23123	-0.093292
PtK_GFP-tub_mCh-p50_flux_ablate	0.212056	0.385004	-0.0562483	-0.0525	-0.210936	-0.0917054	-0.363053

## Sheet: 4S1B
Condition	[Photomark position relative to minus-end (µm)] [Time after ablation (min)] Slope
PtK_GFP-tub_ablate_flux	[6.0375	5.97875	5.92	5.86125	5.8025	5.74375	5.685	5.62625	5.5675	5.50875	5.45	5.39125	5.3325	5.27375	5.215	5.15625	5.0975	5.03875	4.98	4.92125	4.838636363636365]	[9.2	9.4	9.6	9.8	10	10.2	10.4	10.6	10.8	11	11.2	11.4	11.6	11.8	12	12.2	12.4	12.6	12.8	13	13.2]	-0.2953
PtK_GFP-tub_ablate_flux	[4.265625	4.18493	4.10424	4.02355	3.94286	3.86217	3.78148	3.70079	3.6201	3.53941	3.45872	3.37803	3.29734	3.21664	3.13595	3.05526	2.97457	2.89388	2.813190789473685]	[3.6	3.8	4	4.2	4.4	4.6	4.8	5	5.2	5.4	5.6	5.8	6	6.2	6.4	6.6	6.8	7	7.2]	-0.403454
PtK_GFP-tub_ablate_flux	[4.4210094193548395	4.28374	4.14647	4.00919	3.87192	3.7346484112903227]	[6.0	6.2	6.4	6.6	6.8	7.0]	-0.686361

## Sheet: 4S1C
Condition	Minus-end Depolymerization Rates (µm/min)
PtK_GFP-tub_ablate_flux	0.2953
PtK_GFP-tub_ablate_flux	0.403454
PtK_GFP-tub_ablate_flux	0.686361
